# Supplementary material
Source: PubMed Central journal article supplement (PMC5004206)

**Table of Contents**

|                                                                                                                                                                                                                  |         |
|------------------------------------------------------------------------------------------------------------------------------------------------------------------------------------------------------------------|---------|
| Participating Institutions.....                                                                                                                                                                                  | Page 2  |
| Treatment Protocols.....                                                                                                                                                                                         | Page 3  |
| Definition of Clinical End Points.....                                                                                                                                                                           | Page 3  |
| Supplementary Methods.....                                                                                                                                                                                       | Page 4  |
| Supplementary References.....                                                                                                                                                                                    | Page 5  |
| Supplementary Table S1. Cytogenetic, hematologic and clinical characteristics and treatment outcomes of AML patients with t(11;19)(q23;p13.1).....                                                               | Page 12 |
| Supplementary Table S2. Cytogenetic, hematologic and clinical characteristics and treatment outcomes of AML patients with t(11;19)(q23;p13.3).....                                                               | Page 14 |
| Supplementary Table S3. Cytogenetic, hematologic and clinical characteristics and treatment outcomes of ALL patients with t(11;19)(q23;p13.3).....                                                               | Page 16 |
| Supplementary Table S4. Cytogenetic, hematologic and clinical characteristics and treatment outcomes of previously reported adult patients with t(11;19)(q23;p13.1) for whom outcome data are available .....    | Page 19 |
| Supplementary Table S5. Cytogenetic, hematologic and clinical characteristics and treatment outcomes of previously reported adult patients with t(11;19)(q23;p13.1) for whom outcome data are available.....     | Page 23 |
| Supplementary Table S6. Comparison of selected genetic changes between AML patients with t(11;19)(q23;p13.1) and those with t(11;19)(q23;p13.3).....                                                             | Page 26 |
| Supplementary Table S7A. Gene mutations in patients with t(11;19) rearrangements.....                                                                                                                            | Page 27 |
| Supplementary Table S8. Comparison between results of cytogenetic analysis and RNA Sequencing.....                                                                                                               | Page 28 |
| Supplementary Table S9. Genes differentially expressed between t(11;19)(q23;p13.1) and t(11;19)(q23;p13.3) with two aberrant cases removed from analysis.....                                                    | Page 29 |
| Supplementary Table 10A. Genes differentially expressed between patients who achieved CR versus those who did not.....                                                                                           | Page 54 |
| Supplementary Table S10B. Genes differentially expressed between those who achieved CR versus those who did not controlling for translocation partner.....                                                       | Page 56 |
| Supplementary Figure S1. Outcome of AML patients with t(11;19)(q23;p13.1) and AML patients plus one with ambiguous lineage acute leukemia with t(11;19)(q23;p13.3) for whom survival data is available.....      | Page 59 |
| Supplementary Figure S2. Gene set enrichment analysis.....                                                                                                                                                       | Page 60 |
| Supplementary Figures S3. Principal component analysis plot as in the main text, but colored for both translocation cytogenetic band and whether the translocation exists as a sole cytogenetic abnormality..... | Page 61 |

## **PARTICIPATING INSTITUTIONS**

The following CALGB/Alliance institutions participated in this study. For each of these institutions, the current or last principal investigator and the cytogeneticists who analyzed the cases are listed as follows:

Dana Farber Cancer Institute, Boston, MA: Harold J. Burstein, Ramana Tantravahi, Cynthia C. Morton and Paola Dal Cin (grant no. U10CA032291); Roswell Park Cancer Institute, Buffalo, NY: Ellis G. Levine and AnneMarie W. Block (grant no. U10CA059518); The Ohio State University Medical Center, Columbus, OH: Richard M. Goldberg, Karl S. Theil and Nyla A. Heerema (grant no. U10CA180850); University of Chicago Medical Center, Chicago, IL: Hedy L. Kindler, Diane Roulston, Katrin M. Carlson and Michelle M. LeBeau (grant no. U10CA041287); Duke University Medical Center, Durham, NC: Jeffrey Crawford, Sandra H. Bigner and Barbara K. Goodman (grant no. U10CA047577); North Shore University Hospital, Manhasset, NY: Daniel R. Budman, Prasad R. K. Koduru and Chandrika Sreekantaiah (grant no. U10CA035279); Washington University School of Medicine, St. Louis, MO: Nancy L. Bartlett, Jaime Garcia-Heras and Shashikant Kulkarni (grant no. U10CA077440); University of Alabama at Birmingham: Robert Diasio and Andrew J. Carroll; Georgetown University Medical Center, Washington, DC: Minnetta C. Liu and Jeanne M. Meck; Long Island Jewish Medical Center, Lake Success, NY: Daniel R. Budman and Prasad R. K. Koduru; Vermont Cancer Center, Burlington, VT: Steven M. Grunberg and Mary Tang; University of Missouri/Ellis Fischel Cancer Center, Columbia, MO: Clint Kingsley and Tim Hui-Ming Huang; Mount Sinai School of Medicine, New York, NY: Lewis R. Silverman and Vesna Najfeld; Rhode Island Hospital, Providence, RI: Howard Safran, and Aurelia Meloni-Ehrig; University of Tennessee Cancer Center, Memphis, TN: Harvey B. Niell and Sugandhi A. Tharapel; University of Illinois, Chicago, IL: Arkadiusz Z. Dudek and Valerie Lindgren; Moores University of California San Diego Cancer Center, San Diego, CA: Barbara A. Parker and E. Robert Wassman, Jr.; University of Maryland Cancer Center, Baltimore, MD: Martin J. Edelman and Judith Stamberg.

## TREATMENT PROTOCOLS

Patients in this study received intensive cytarabine/daunorubicin-based therapy on one of the following Cancer and Leukemia Group B (CALGB) frontline treatment protocols: 8525 (n=5),<sup>1</sup> 8923 (n=1),<sup>2</sup> 9120 (n=1),<sup>3</sup> 9222 (n=4),<sup>4</sup> 9621 (n=5),<sup>5</sup> 19808 (n=3),<sup>6</sup> 10503 (n=5),<sup>7</sup> 9720 (n=2),<sup>8</sup> 10201 (n=3),<sup>9</sup> 10603 (n=1),<sup>10</sup> 11002 (n=2) or 10102 (n=3).<sup>11</sup> CALGB 11002 evaluated clinical benefit from primary therapy with decitabine-based chemotherapy, given either alone or in combination with bortezomib.

Patients who enrolled on the treatment protocols also provided written informed consent to participate in the companion protocols CALGB 8461<sup>12</sup> (prospective cytogenetic companion), CALGB 9665 (leukemia tissue bank), which involved collection and preservation of pretreatment bone marrow (BM) aspirates, blood samples, and buccal swabs and CALGB 20202 (molecular studies in AML). Study protocols were in accordance with the Declaration of Helsinki and approved by the institutional review boards at each center, and all patients provided written informed consent.

## DEFINITION OF CLINICAL END POINTS

Complete remission (CR) required an absolute neutrophil count  $\geq 1,500/\mu\text{L}$ , platelet count  $\geq 100,000/\mu\text{L}$ , no leukemic blasts in the blood, BM cellularity  $\geq 20\%$  with maturation of all cell lines, no Auer rods,  $<5\%$  BM blast cells, and no evidence of extramedullary leukemia, all of which had persisted for at least 1 month. Relapse was defined by  $\geq 5\%$  BM blasts, circulating leukemic blasts, or the development of extramedullary leukemia. Disease-free survival (DFS) was measured from the date of CR until the date of relapse or death; patients alive and relapse-free at last follow-up were censored. Overall survival (OS) was measured from the date on study

until the date of death, and patients alive at last follow-up were censored.<sup>13</sup>

## SUPPLEMENTARY METHODS

We reviewed the CALGB/Alliance database, which contains 4,455 AML and ALL patients consecutively, and identified 35 adults with translocations between chromosomes 11 and 19. Nineteen patients, all diagnosed with AML, harbored t(11;19)(q23;p13.1). Among 16 patients with t(11;19)(q23;p13.3), 12 were diagnosed with AML, three with ALL, and one with ambiguous lineage acute leukemia (who received AML-type therapy and is, for the purposes of this study, grouped with AML patients). All patients with t(11;19) received treatment on CALGB protocols and provided Institutional Review Board-approved, protocol-specific informed consent in accordance with federal and institutional guidelines. Pretreatment BM and/or blood samples were analyzed cytogenetically in CALGB-designated institutional laboratories using short-term (24-48 hours) unstimulated cultures, a direct method or both. At least 20 G- or Q-banded metaphases were analyzed in all but one patient. The karyotypes were interpreted according to the International System for Human Cytogenetic Nomenclature.<sup>14</sup> A minimum of two karyotypes from each abnormal clone were centrally reviewed by the CALGB Karyotype Review Committee.<sup>15</sup>

Baseline characteristics were compared between t(11;19)(q23;p13.1) and t(11;19)(q23;p13.3) AML patients using Fisher's exact test for categorical variables and the Wilcoxon rank-sum test for continuous variables.<sup>16</sup> For time-to-event analyses, we calculated survival estimates using the Kaplan-Meier method, and compared groups by the log-rank test.<sup>17</sup> Statistical analyses were performed by the Alliance Statistics and Data Center. Results analyzed were available in the database as of February 9, 2015.

## Molecular analyses

Viable cryopreserved BM or blood cells of patients enrolled onto the CALGB 9665 tissue bank protocol were stored for future analyses prior to starting treatment. Mononuclear cells from BM or blood were enriched by Ficoll-Hypaque gradient and cryopreserved in liquid nitrogen until thawed at 37°C for analysis. DNA extractions were performed using the DNeasy Blood and Tissue Kit (QIAGEN, Hilden, Germany). The mutational status of 32 genes (*ASXL1*, *BCOR*, *BCORL1*, *CBL*, *DNMT3A*, *ETV6*, *EZH2*, *FLT3* for tyrosine kinase domain mutations [*FLT3*-TKD], *GATA2*, *IDH1*, *IDH2*, *KIT*, *KRAS*, *NPM1*, *NRAS*, *PHF6*, *PTPN11*, *RAD21*, *RUNX1*, *SF1*, *SF3A1*, *SF3B1*, *SMC1A*, *SMC3*, *SRSF2*, *STAG2*, *TET2*, *TP53*, *U2AF1*, *U2AF2*, *WT1* and *ZRSR2*) was determined by targeted amplicon sequencing using the Miseq platform (Illumina, San Diego, CA). The variant allele frequency (VAF) cut-off for reporting mutations was set to 0.3. Testing for the presence or absence of *FLT3* internal tandem duplication (*FLT3*-ITD) and mutations in *CEBPA* was performed as previously described.<sup>18,19</sup> Only double *CEBPA* mutations were considered as clinically relevant. Molecular analyses were performed at The Ohio State University, Columbus, OH.

## Gene- and microRNA-expression profiling

Total RNA was extracted from BM or blood blast cells using the Trizol extraction method kit (QIAGEN). For each sample with adequate quantity and quality of RNA, the RNA was used to make two sets of libraries. Gene expression libraries were constructed with the Illumina Truseq stranded mRNA library preparation kit, while small RNA libraries were constructed with the NEBNext small RNA library prep kit (New England Biolabs, Ipswich, MA). Both libraries were sequenced on an Illumina HiSeq 2500 targeting 40x10<sup>6</sup> and 25x10<sup>6</sup> reads for mRNA and small RNA libraries, respectively.

DNA library preparations were performed according to the manufacturer's instructions. Samples were pooled and run on the Miseq machine using the Illumina Miseq Reagent Kit v3. Sequenced reads were aligned to the hg19 genome build using the Illumina Isis Banded Smith-Waterman aligner. Single nucleotide variant and indel calling was performed using MuTect and GATK SomaticIndelDetector (Broad Institute, Cambridge, MA), respectively.<sup>20,21</sup> Aggregate putative variant reports were produced with Mucor.<sup>22</sup> All called variants underwent visual inspection of the aligned reads using the Integrative Genomics Viewer (Broad Institute).<sup>23</sup>

Protein-coding gene expression was quantitated by estimating abundances for protein-coding isoforms from GENCODE21<sup>24</sup> with Sailfish,<sup>25</sup> then using custom bioinformatics scripts to collapse isoforms into genes. Estimated gene-level counts were input into DESeq2<sup>26</sup> and genes were tested for differential expression between groups using the negative binomial test. Raw reads were also aligned to GRCh38 using STAR,<sup>27</sup> and chimeric/fusion transcripts were called using custom bioinformatics scripts.

Alignments of microRNAs from the Illumina FASTQ files were obtained using Novoalign (Novocraft, Selangor, Malaysia). Quality control was performed with FastQC (Babraham Institute, Cambridge, UK), and the adaptor stripping option in Novoalign was used to remove any residual terminal adaptor sequences left in the reads. The microRNAs were normalized as reads per million, thresholded at 10, and invariant microRNAs were removed using standard conditions (<20% of expression data have at least a 1.5-fold change in either direction from microRNA's median value or percent of data missing or filtered out exceeds 50%). MicroRNAs differentially expressed between the two cytogenetic groups with a *P*-value <0.05 and false discovery rate (FDR) <0.1 were used to define the microRNA signature.

**SUPPLEMENTARY REFERENCES**

1. Mayer RJ, Davis RB, Schiffer CA, Berg DT, Powell BL, Schulman P *et al.* Intensive postremission chemotherapy in adults with acute myeloid leukemia. *N Engl J Med* 1994; **331**: 896-903.
2. Stone RM, Berg DT, George SL, Dodge RK, Paciucci PA, Schulman P *et al.* Granulocyte-macrophage colony-stimulating factor after initial chemotherapy for elderly patients with primary acute myelogenous leukemia. *N Engl J Med* 1995; **332**: 1671-1677.
3. Cassileth PA, Harrington DP, Appelbaum FR, Lazarus HM, Rowe JM, Paietta E *et al.* Chemotherapy compared with autologous or allogeneic bone marrow transplantation in the management of acute myeloid leukemia in first remission. *New Engl J Med* 1998; **339**: 1649-1656.
4. Moore JO, George SL, Dodge RK, Amrein PC, Powell BL, Kolitz JE *et al.* Sequential multiagent chemotherapy is not superior to high-dose cytarabine alone as postremission intensification therapy for acute myeloid leukemia in adults under 60 years of age: Cancer and Leukemia Group B study 9222. *Blood* 2005; **105**: 3420-3427.
5. Kolitz JE, George SL, Dodge RK, Hurd DD, Powell BL, Allen SL *et al.* Dose escalation studies of cytarabine, daunorubicin, and etoposide with and without multidrug resistance modulation with PSC-833 in untreated adults with acute myeloid leukemia younger than 60 years: final induction results of Cancer and Leukemia Group B study 9621. *J Clin Oncol* 2004; **22**: 4290-4301.
6. Kolitz JE, George SL, Marcucci G, Vij R, Powell BL, Allen SL *et al.* P-glycoprotein inhibition using valsopodar (PSC-833) does not improve outcomes for patients under age 60 years with newly diagnosed acute myeloid leukemia: Cancer and Leukemia Group B study 19808. *Blood* 2010; **116**:1413-1421.
7. Blum W, Donohue K, Marcucci G, DeAngelo D, Uy GL, Powell BL *et al.* Challenges for

- conducting clinical trials evaluating maintenance chemotherapy in acute myeloid leukemia (AML): a Cancer and Leukemia Group B (CALGB) study. *Blood* 2010; **116**: 898-899 (abstract 2176).
8. Baer MR, George SL, Caligiuri MA, Sanford BL, Bothun SM, Mrózek K *et al.* Low-dose interleukin-2 immunotherapy does not improve outcome of patients age 60 years and older with acute myeloid leukemia in first complete remission: Cancer and Leukemia Group B study 9720. *J Clin Oncol* 2008; **26**: 4934-4939.
  9. Marcucci G, Moser B, Blum W, Stock W, Wetzler M, Koltiz JE *et al.* A phase III randomized trial of intensive induction and consolidation chemotherapy ± oblimersen, a pro-apoptotic Bcl-2 antisense oligonucleotide in untreated acute myeloid leukemia patients >60 years old. *J Clin Oncol* 2007; **25**: 360s (abstract 7012).
  10. Stone RM, Fischer T, Paquette R, Schiller G, Schiffer CA, Ehninger G *et al.* Phase IB study of the FLT3 kinase inhibitor midostaurin with chemotherapy in younger newly diagnosed adult patients with acute myeloid leukemia. *Leukemia* 2012; **26**: 2061-2068.
  11. Stock W, Yu DH, Sanford B, Lozanski G, Cataland S, Vij R *et al.* Incorporation of Alemtuzumab into front-line therapy of adult acute lymphoblastic leukemia (ALL) is feasible: a phase I/II study from the Cancer and Leukemia Group B (CALGB 10102). *Blood* 2005; **106**:46a (abstract 145).
  12. Byrd JC, Mrózek K, Dodge RK, Carroll AJ, Edwards CG, Arthur DC *et al.* Pretreatment cytogenetic abnormalities are predictive of induction success, cumulative incidence of relapse, and overall survival in adult patients with de novo acute myeloid leukemia: results from Cancer and Leukemia Group B (CALGB 8461). *Blood* 2002; **100**: 4325-4336.
  13. Cheson BD, Cassileth PA, Head DR, Schiffer CA, Bennett JM, Bloomfield CD *et al.* Report of the National Cancer Institute-sponsored workshop on definitions of diagnosis and response in acute myeloid leukemia. *J Clin Oncol* 1990; **8**: 813-819.



14. Mitelman F (ed). *ISCN 1995. International System for Human Cytogenetic Nomenclature*. Karger: Basel, Switzerland, 1995.
15. Mrózek K, Carroll AJ, Maharry K, Rao KW, Patil SR, Pettenati MJ *et al*. Central review of cytogenetics is necessary for cooperative group correlative and clinical studies of adult acute leukemia: the Cancer and Leukemia Group B experience. *Int J Oncol* 2008; **33**: 239-244.
16. Vittinghoff E, Glidden DV, Shiboski SC, McCulloch CE. *Regression Methods in Biostatistics: Linear, Logistic, Survival and Repeated Measures Models*. Springer: New York, NY, 2005.
17. Kaplan EL, Meier P. Nonparametric estimation from incomplete observations. *J Am Stat Assoc* 1958; **53**: 457-481.
18. Thiede C, Steudel C, Mohr B, Schaich M, Schäkel U, Platzbecker U *et al*. Analysis of FLT3-activating mutations in 979 patients with acute myelogenous leukemia: association with FAB subtypes and identification of subgroups with poor prognosis. *Blood* 2002; **99**: 4326-4335.
19. Marcucci G, Maharry K, Radmacher MD, Mrózek K, Vukosavljevic T, Paschka P *et al*. Prognostic significance of, and gene and microRNA expression signatures associated with, *CEBPA* mutations in cytogenetically normal acute myeloid leukemia with high-risk molecular features: A Cancer and Leukemia Group B study. *J Clin Oncol* 2008; **26**: 5078-5087.
20. Cibulskis K, Lawrence MS, Carter SL, Sivachenko A, Jaffe D, Sougnez C *et al*. Sensitive detection of somatic point mutations in impure and heterogeneous cancer samples. *Nat Biotechnol* 2013; **31**: 213-219.
21. DePristo MA, Banks E, Poplin R, Garimella KV, Maguire JR, Hartl C *et al*. A framework for variation discovery and genotyping using next-generation DNA sequencing data. *Nat Genet* 2011; **43**: 491-498.

22. Kroll KW, Einfeld A-K, Lozanski G, Bloomfield CD, Byrd JC, Blachly JS. MuCor: mutation aggregation and correlation. bioRxiv doi: 10.1101/022780. Accessed July 30, 2015.
23. Robinson JT, Thorvaldsdóttir H, Winckler W, Guttman M, Lander ES, Getz G *et al.* Integrative genomics viewer. *Nat Biotechnol* 2011; **29**: 24-26.
24. Harrow J, Frankish A, Gonzalez JM, Tapanari E, Diekhans M, Kokocinski F *et al.* GENCODE: the reference human genome annotation for The ENCODE Project. *Genome Res* 2012; **22**: 1760-1774.
25. Patro R, Mount SM, Kingsford C. Sailfish enables alignment-free isoform quantification from RNA-seq reads using lightweight algorithms. *Nat Biotechnol* 2014; **32**: 462-464.
26. Love MI, Huber W, Anders S. Moderated estimation of fold change and dispersion for RNA-seq data with DESeq2. *Genome Biol* 2014; **15**: 550.
27. Dobin A, Davis CA, Schlesinger F, Drenkow J, Zaleski C, Jha S *et al.* STAR: ultrafast universal RNA-seq aligner. *Bioinformatics* 2013; **29**: 15-21.
28. Cerveira N, Lisboa S, Correia C, Bizarro S, Santos J, Torres L *et al.* Genetic and clinical characterization of 45 acute leukemia patients with *MLL* gene rearrangements from a single institution. *Mol Oncol* 2012; **6**: 553-564.
29. De Braekeleer E, Meyer C, Douet-Guilbert N, Basinko A, Le Bris MJ, Morel F *et al.* Identification of *MLL* partner genes in 27 patients with acute leukemia from a single cytogenetic laboratory. *Mol Oncol* 2011; **5**: 555-563.
30. Huh HJ, Lee SH, Yoo KH, Sung KW, Koo HH, Kim K *et al.* Therapy-related myeloid neoplasms in 39 Korean patients: a single institution experience. *Ann Lab Med* 2013; **33**: 97-104.
31. Huret JL, Brizard A, Slater R, Charrin C, Bertheas MF, Guilhot F *et al.* Cytogenetic heterogeneity in t(11;19) acute leukemia: clinical, hematological and cytogenetic analyses of 48 patients—updated published cases and 16 new observations. *Leukemia* 1993; **7**: 152-160.

32. Kakihana K, Kubo F, Wakabayashi S, Kurosu T, Miki T, Murakami N *et al.* A novel variant form of *MLL-ELL* fusion transcript with t(11;19)(q23;p13.1) in chronic myelomonocytic leukemia transforming to acute myeloid leukemia. *Cancer Genet Cytogenet* 2008; **184**: 109-112.
33. Kondo T, Yasumoto A, Arita K, Sugita J, Shigematsu A, Okada K *et al.* Successful treatment of acute myelogenous leukemia with favorable cytogenetics by reduced-intensity stem cell transplantation. *Int J Hematol* 2010; **91**: 310-321.
34. Manola KN, Georgakakos VN, Margaritis D, Stavropoulou C, Panos C, Kotsianidis I *et al.* Disruption of the *ETV6* gene as a consequence of a rare translocation (12;12)(p13;q13) in treatment-induced acute myeloid leukemia after breast cancer. *Cancer Genet Cytogenet* 2008; **180**: 37-42.
35. Moorman AV, Hagemeijer A, Charrin C, Rieder H, Secker-Walker LM. The translocations, t(11;19)(q23;p13.1) and t(11;19)(q23;p13.3): a cytogenetic and clinical profile of 53 patients. *Leukemia* 1998; **12**: 805-810.
36. Muto T, Takeuchi M, Yamazaki A, Sugita Y, Tsukamoto S, Sakai S *et al.* Efficacy of myeloablative allogeneic hematopoietic stem cell transplantation in adult patients with *MLL-ELL*-positive acute myeloid leukemia. *Int J Hematol* 2015; **102**: 86-92.
37. Parkin B, Ouilllette P, Li Y, Keller J, Lam C, Roulston D *et al.* Clonal evolution and devolution after chemotherapy in adult acute myelogenous leukemia. *Blood* 2013; **121**: 369-377.
38. Sarova I, Brezinova J, Zemanova Z, Bystricka D, Krejcik Z, Soukup P *et al.* Characterization of chromosome 11 breakpoints and the areas of deletion and amplification in patients with newly diagnosed acute myeloid leukemia. *Genes Chromosomes Cancer* 2013; **52**: 619-635.

39. Yamamoto K, Nagata K, Tsurukubo Y, Inagaki K, Ono R, Taki T *et al.* Translocation (8;12)(q13;p13) during disease progression in acute myelomonocytic leukemia with t(11;19)(q23;p13.1). *Cancer Genet Cytogenet* 2002; **137**: 64-67.
40. Takeuchi M, Nakaseko C, Miyagi S, Takeda Y, Ozawa S, Ohwada C *et al.* Clonal expansion of non-leukemic cells expressing two novel *MLL-ELL* variants differing in transforming activity. *Leukemia* 2008; **22**: 861-864.
41. Vermaelen K, Barbieri D, Michaux JL, Tricot G, Casteels-Van Daele M, Noens L *et al.* Anomalies of the long arm of chromosome 11 in human myelo- and lymphoproliferative disorders. I. Acute nonlymphocytic leukemia. *Cancer Genet Cytogenet* 1983; **10**: 105-116.
42. Blanco JG, Dervieux T, Edick MJ, Mehta PK, Rubnitz JE, Shurtleff S *et al.* Molecular emergence of acute myeloid leukemia during treatment for acute lymphoblastic leukemia. *Proc Natl Acad Sci U S A* 2001; **98**: 10338-10343.
43. Naghashpour M, Lancet J, Moscinski L, Zhang L. Mixed phenotype acute leukemia with t(11;19)(q23;p13.3)/*MLL-MLLT1(ENL)*, B/T-lymphoid type: a first case report. *Am J Hematol* 2010; **85**: 451-454.
44. Shen Y-M, Hung G-Y, Yen H-J, Hsieh M-Y, Hsieh T-K. Early development of acute myeloid leukemia following treatment of osteosarcoma: a case report and review of the literature. *Pediatr Neonatol* 2009; **50**: 239-244.
45. Suehiro Y, Uike N, Kumagawa M, Goto T, Muta K, Kozuru M. Therapy-related acute myeloid leukemia with minimal myeloid differentiation (AML-M0) associated with a t(11;19)(q23;p13.3) translocation. *Am J Hematol* 1997; **55**: 165-166.
46. Zhang Y, Poetsch M, Weber-Matthiesen K, Rohde K, Winkemann M, Haferlach T *et al.* Secondary acute leukaemias with 11q23 rearrangement: clinical, cytogenetic, FISH and FICTION studies. *Br J Haematol* 1996; **92**: 673-680.

47. Chin L-K, Cheah CY, Michael PM, MacKinnon RN, Campbell LJ. 11q23 rearrangement and duplication of *MLLT1-MLL* gene fusion in therapy-related acute myeloid leukemia. *Leuk Lymphoma* 2012; **53**: 2066-2068.
48. Cigudosa JC, Odero MD, Calasanz MJ, Solé F, Salido M, Arranz E *et al.* De novo erythroleukemia chromosome features include multiple rearrangements, with special involvement of chromosomes 11 and 19. *Genes Chromosomes Cancer* 2003; **36**: 406-412.
49. Ninomiya M, Abe A, Yokozawa T, Ozeki K, Yamamoto K, Ito M *et al.* Establishment of a myeloid leukemia cell line, TRL-01, with *MLL-ENL* fusion gene. *Cancer Genet Cytogenet* 2006; **169**: 1-11.
50. Vendrame-Goloni CB, Varella-Garcia M, Carvalho-Salles AB, Ruiz MA, Junior OR, Fett-Conte AC. Translocation (11;19)(q23;p13.3) associated with a novel t(5;16)(q13;q22) in a patient with acute myelocytic leukemia. *Cancer Genet Cytogenet* 2003; **141**: 71-74.
51. Rubnitz JE, Camitta BM, Mahmoud H, Raimondi SC, Carroll AJ, Borowitz MJ *et al.* Childhood acute lymphoblastic leukemia with the *MLL-ENL* fusion and t(11;19)(q23;p13.3) translocation. *J Clin Oncol* 1999; **17**: 191-196.
52. Wright TL, Bardy PG, Disney P, Moore S, Horvath N. Isolated cardiac recurrence of acute lymphoblastic leukemia characterized by t(11;19) two years after unrelated allogeneic bone marrow transplantation. *Cancer Genet Cytogenet* 2002; **137**: 146-149.
53. Finke J, Kunzmann R, Lange W. Detection of chromosome 11q23 involving translocations by pulsed field gel electrophoresis. *Ann Hematol* 1994; **68**:133-138.
54. Yoo BJ, Nam MH, Sung HJ, Lim CS, Lee CK, Cho YJ *et al.* A case of therapy-related acute lymphoblastic leukemia with t(11;19)(q23;p13.3) and *MLL/MLLT1* gene rearrangement. *Korean J Lab Med* 2011; **31**: 13-17.

**Supplementary Table S1.** Cytogenetic, hematologic and clinical characteristics and treatment outcomes of AML patients with t(11;19)(q23;p13.1)

| Patient no.                                                               | Age/Sex | Race            | Karyotype                               | FAB | Hb (g/dL) | Plts ( $\times 10^9/L$ ) | WBC ( $\times 10^9/L$ ) | PB/BM blasts (%) | Organ involvement | Response        | DFS (mo) | OS (mo)            |
|---------------------------------------------------------------------------|---------|-----------------|-----------------------------------------|-----|-----------|--------------------------|-------------------------|------------------|-------------------|-----------------|----------|--------------------|
| <i>Patients with t(11;19)(q23;p13.1) as a sole chromosome abnormality</i> |         |                 |                                         |     |           |                          |                         |                  |                   |                 |          |                    |
| 1                                                                         | 63/F    | B               | 46,XX,t(11;19)(q23;p13.1)[2]/46,XX[5]   | M1  | 10.4      | 110                      | 4.1                     | 25/43            | No                | CR              | 74.1+    | 75.4+              |
| 2                                                                         | 28/F    | W               | 46,XX,t(11;19)(q23;p13.1)[20]           | M4  | 10.3      | 111                      | 71.3                    | 22/33            | No                | NE <sup>a</sup> | NA       | 11                 |
| 3                                                                         | 47/M    | W               | 46,XY,t(11;19)(q23;p13.1)[7]/ 46,XY[13] | M2  | 8.9       | 22                       | 3.2                     | 4/26             | No                | CR              | 5.5      | 10.4 <sup>b</sup>  |
| 4                                                                         | 54/M    | W               | 46,XY,t(11;19)(q23;p13.1)[30]           | M5a | 8.9       | 19                       | 52.5                    | 1/NR             | No                | NE <sup>c</sup> | NA       | 0.1                |
| 5                                                                         | 58/F    | Native American | 46,XX,t(11;15;19)(q23;q15;p13.1)[20]    | M5b | 8.6       | 74                       | 71.8                    | 26/51            | No                | CR              | 3.6      | 11.4 <sup>d</sup>  |
| 6                                                                         | 43/M    | W               | 46,XY,t(11;19)(q23;p13.1)[15]/ 46,XY[5] | M4  | 15.8      | 163                      | 37.7                    | 8/55             | NR                | CR              | 37.5+    | 38.4+ <sup>d</sup> |
| 7                                                                         | 67/M    | NR              | 46,XY,t(11;19)(q23;p13.1)[24]/ 46,XY[8] | NR  | 8.9       | 34                       | 2.1                     | 14/34            | No                | No CR           | NA       | 3.8                |
| 8                                                                         | 41/F    | W               | 46,XX,t(11;19)(q23;p13.1)[28]           | M4  | 8.2       | 19                       | 90                      | 11/85            | No                | No CR           | NA       | 1.5                |
| 9                                                                         | 60/F    | W               | 46,XX,t(11;19)(q23;p13.1)[20]           | M2  | 8.6       | 16                       | 4.6                     | 41/68            | Skin, gums        | No CR           | NA       | 2                  |
| 10                                                                        | 64/F    | W               | 46,XX,t(11;19)(q23;p13.1)[42]           | M5b | 11.1      | 49                       | 25.4                    | 2/86             | Liver             | CR              | 5.5      | 11                 |
| 11                                                                        | 20/F    | W               | 46,XX,t(11;19)(q23;p13.1)[26]           | M4  | 2.8       | 29                       | 97.5                    | 51/77            | Gums, lymph nodes | No CR           | NA       | 7.5                |

| Patient no.                                                                     | Age/Sex | Race     | Karyotype                                                                                                                               | FAB | Hb (g/dL) | Plts ( $\times 10^9/L$ ) | WBC ( $\times 10^9/L$ ) | PB/BM blasts (%) | Organ involvement            | Response        | DFS (mo) | OS (mo)          |
|---------------------------------------------------------------------------------|---------|----------|-----------------------------------------------------------------------------------------------------------------------------------------|-----|-----------|--------------------------|-------------------------|------------------|------------------------------|-----------------|----------|------------------|
| 12                                                                              | 54/M    | W        | 46,XY,t(11;19)(q23;p13.1)[22]                                                                                                           | M5b | 10.2      | 88                       | 59.3                    | 5/76             | No                           | CR              | 6.3      | 8.2              |
| 13                                                                              | 24/F    | W        | 46,XX,t(11;19)(q23;p13.1)[20]                                                                                                           | M4  | 7.8       | 42                       | 71.6                    | 0/50             | Heart, lung, liver and colon | NE <sup>e</sup> | NA       | 0                |
| 14                                                                              | 58/M    | W        | 46,XY,t(11;19)(q23;p13.1)[19]/46,XY[1]                                                                                                  | M4  | 9.1       | 117                      | 21.5                    | 6/58             | No                           | No CR           | NA       | 9.4              |
| <i>Patients with t(11;19)(q23;p13.1) and secondary chromosome abnormalities</i> |         |          |                                                                                                                                         |     |           |                          |                         |                  |                              |                 |          |                  |
| 15                                                                              | 70/F    | W        | 46,XX,t(11;19)(q23;p13.1)[1]/46,XX,add(5)(q33),add(10)(p11.2),der(11)add(11)(p11.2)add(11)(q12),der(19)t(11;19)(q23;p13.1)[17]/46,XX[2] | M5a | 8.8       | 28                       | 40.6                    | 5/46             | Skin                         | No CR           | NA       | 0.5              |
| 16                                                                              | 35/M    | W        | 47,XY,+8,t(11;19)(q23;p13.1)[30]                                                                                                        | M5a | 9.8       | 59                       | 29.4                    | 75/93            | No                           | CR              | 4.1      | 7.7 <sup>b</sup> |
| 17                                                                              | 66/F    | W        | 46,XX,t(11;19)(q23;p13.1)[3]/47,XX,idem,+21[2]/46,XX[25]                                                                                | M2  | 10        | 97                       | 2.8                     | 21/64            | No                           | CR              | 17.9     | 28.5             |
| 18                                                                              | 33/M    | W        | 46,XY,t(11;19)(q23;p13.1)[17]/46,idem,inv(12)(p12p13)[3]                                                                                | M5b | 10.3      | 111                      | 25.9                    | 10/63            | No                           | No CR           | NA       | 7.6              |
| 19                                                                              | 49/F    | Hispanic | 46,XX,t(11;19)(q23;p13.1)[25]/46,idem,del(20)(q11)[3]                                                                                   | M4  | 10.7      | 42                       | 7.6                     | 2/44             | No                           | CR              | 5.6      | 23.5             |

Abbreviations: B, African American; BM, bone marrow; CR, complete remission; DFS, disease-free survival; FAB, French-American-British classification; F, female; Hb, hemoglobin; M, male; NA, not applicable; NE, not evaluable; NR, not reported; OS, overall survival; PB, peripheral blood; Plts, platelet count; W, Caucasian; WBC, white blood count.

<sup>a</sup> No bone marrow examination after treatment was performed.

<sup>b</sup> Patient underwent autologous hematopoietic stem cell transplant in first complete remission.

<sup>c</sup> Patient died of acute renal failure on day one of treatment.

<sup>d</sup> Patient underwent allogeneic hematopoietic stem cell transplant in first complete remission.

<sup>e</sup> Patient died of cardiac arrest one day after receiving chemotherapy.

**Supplementary Table S2.** Cytogenetic, hematologic and clinical characteristics and treatment outcomes of AML patients with t(11;19)(q23;p13.3)

| Patient no.                                                                             | Age/<br>Sex | Race                    | Karyotype                                                | FAB                | Hb<br>(g/dL) | Plts<br>(x10 <sup>9</sup> /<br>L) | WBC<br>(x10 <sup>9</sup> /<br>L) | PB/BM<br>blasts<br>(%) | Organ<br>involvement    | Res-<br>ponse   | DFS<br>(mo) | OS<br>(mo)         |
|-----------------------------------------------------------------------------------------|-------------|-------------------------|----------------------------------------------------------|--------------------|--------------|-----------------------------------|----------------------------------|------------------------|-------------------------|-----------------|-------------|--------------------|
| <i>Patients with AML and t(11;19)(q23;p13.3) as a sole chromosome abnormality</i>       |             |                         |                                                          |                    |              |                                   |                                  |                        |                         |                 |             |                    |
| 20                                                                                      | 40/F        | W                       | 46,XX,t(11;19)(q23;p13.3)[20]                            | Other <sup>a</sup> | 7.8          | 65                                | 10                               | 13/45                  | No                      | NE <sup>b</sup> | NA          | 0.4                |
| 21                                                                                      | 34/F        | W                       | 46,XX,t(11;19)(q23;p13.3)[20]                            | M1                 | 8.5          | 21                                | 36.5                             | 72/86                  | No                      | No CR           | NA          | 9.2                |
| 22                                                                                      | 25/F        | W                       | 46,XX,t(11;19)(q23;p13.3)[32]/<br>46,XX[2]               | M5a                | 10.7         | 86                                | 29.7                             | 85/92                  | Gums,<br>lymph<br>nodes | CR              | 10.8        | 20.3               |
| 23                                                                                      | 26/F        | W                       | 46,XX,t(11;19)(q23;p13.3)[22]                            | M5b                | 9.6          | 45                                | 8.3                              | 44/87                  | No                      | CR              | 9.5         | 17.8               |
| 24                                                                                      | 84/F        | W                       | 46,XX,t(11;19)(q23;p13.3)[15]/<br>46,XX[5]               | M5a                | 10           | 29                                | 20.2                             | 76/90                  | No                      | CR              | 2.7         | 5.6                |
| <i>Patients with AML and t(11;19)(q23;p13.3) and secondary chromosome abnormalities</i> |             |                         |                                                          |                    |              |                                   |                                  |                        |                         |                 |             |                    |
| 25                                                                                      | 67/F        | W                       | 46,XX,t(11;19)(q23;p13.3)[16]/<br>47,idem,+8[4]          | Other <sup>c</sup> | 10.4         | 140                               | 10.4                             | 6/72                   | No                      | CR              | 89.3+       | 90.7+ <sup>d</sup> |
| 26                                                                                      | 27/M        | Native<br>Ameri-<br>can | 46,XY,t(11;19)(q23;p13.3)[1]/<br>47,idem,+8[22]/46,XY[6] | M5b                | 7.5          | 56                                | 3.6                              | 61/88                  | No                      | CR              | 2.2         | 7.6                |
| 27                                                                                      | 34/F        | B                       | 47,XX,+8,t(11;19)(q23;p13.3)[13]/<br>46,XX[7]            | M5a                | 12           | 21                                | 2.6                              | 45/96                  | Gums                    | CR              | 10          | 15.1               |
| 28                                                                                      | 31/F        | W                       | 46,XX,+8,t(11;19)(q23;p13.3),<br>+13[20]                 | M5a                | 9.5          | 66                                | 52.7                             | 73/94                  | No                      | NE <sup>e</sup> | NA          | 1.3                |



| Patient no. | Age/Sex | Race | Karyotype                                                                                             | FAB                | Hb (g/dL) | Plts ( $\times 10^9/L$ ) | WBC ( $\times 10^9/L$ ) | PB/BM blasts (%) | Organ involvement | Response        | DFS (mo) | OS (mo)            |
|-------------|---------|------|-------------------------------------------------------------------------------------------------------|--------------------|-----------|--------------------------|-------------------------|------------------|-------------------|-----------------|----------|--------------------|
| 29          | 43/F    | W    | 46,XX,+8,dic(10;12)(p11.2;p11.2),t(11;19)(q23;p13.3)[21]                                              | M5b                | 7.4       | 88                       | 6.4                     | 45/90            | NR                | CR              | 6.0      | 10.0               |
| 30          | 38/M    | W    | 46,XY,t(11;19)(q23;p13.3)[15]/47,idem,+X,del(12)(p12p13)[5]                                           | M0                 | 9.6       | 184                      | 2.3                     | 2/60             | No                | CR              | 133+     | 134.3 <sup>f</sup> |
| 31          | 62/M    | W    | 46,XY,+9,t(11;19)(q23;p13.3),-14,i(14)(q10)[20]                                                       | Other <sup>c</sup> | 8.9       | 34                       | 80.7                    | 86/85            | Spleen            | No CR           | NA       | 12.5               |
| 32          | 70/M    | W    | 46,XY,del(7)(q11.2q36),t(11;19)(q23;p13.3),del(20)(q11.2q13.3)[18]/46,idem,add(5)(q31),add(6)(q12)[3] | NR                 | 6.2       | 20                       | 2.6                     | 55/84            | No                | NE <sup>g</sup> | NA       | 1.1                |

Abbreviations: B, African American; BM, bone marrow; CR, complete remission; CRi, complete remission with incomplete count recovery, DFS, disease-free survival; FAB, French-American-British classification; F, female; Hb, hemoglobin; M, male; mo, months; NA, not applicable; NE, not evaluable; NR, not reported, OS, overall survival; PB, peripheral blood; Plts, platelet count; W, Caucasian; WBC, white blood count.

<sup>a</sup> Ambiguous lineage acute leukemia.

<sup>b</sup> Patient died on day 11 of treatment.

<sup>c</sup> Therapy-related AML.

<sup>d</sup> Patient underwent allogeneic hematopoietic stem cell transplant in first complete remission.

<sup>e</sup> Patient died of cardiopulmonary arrest before disease response assessment.

<sup>f</sup> Patient underwent autologous hematopoietic stem cell transplant in first complete remission.

<sup>g</sup> Patient died of massive subdural hemorrhage on day 2 of second induction cycle of treatment.

**Supplementary Table S3.** Cytogenetic, hematologic and clinical characteristics and treatment outcomes of ALL patients with t(11;19)(q23;p13.3)

| <i>Patient no.</i> | <i>Age/ Sex</i> | <i>Race</i> | <i>Karyotype</i>                                                                                      | <i>Hb (g/dL)</i> | <i>Plts (x10<sup>9</sup>/L)</i> | <i>WBC (x10<sup>9</sup>/L)</i> | <i>PB/BM blasts (%)</i> | <i>Organ involvement</i> | <i>Response</i> | <i>DFS (mo)</i> | <i>OS (mo)</i>   |
|--------------------|-----------------|-------------|-------------------------------------------------------------------------------------------------------|------------------|---------------------------------|--------------------------------|-------------------------|--------------------------|-----------------|-----------------|------------------|
| 33                 | 79/F            | W           | 46,XX,t(11;19)(q23;p13.3)[20]                                                                         | 12.5             | 165                             | 92.5                           | 10/90                   | No                       | CRi             | 2.1             | 5.2              |
| 34                 | 79/F            | W           | BM: 46,XX,t(11;19)(q23;p13.3)[20]<br>Blood: 46,XX,t(11;19)(q23;p13.3)[20]                             | 13.8             | 11                              | 231.9                          | 98/94                   | NR                       | No CR           | NA              | 0.8              |
| 35                 | 30/F            | B           | 86<4n>,XXXX,add(1)(p36.1)x2,-9,-11,t(11;19)(q23;p13.3),-12,-15,-17,-18,der(19)t(11;19)(q23;p13.3)[20] | 7.7              | 66                              | 11.8                           | 46/65                   | No                       | CR              | 7.9             | 8.8 <sup>a</sup> |

Abbreviations: B, African American; BM, bone marrow; CR, complete remission; CRi, complete remission with incomplete count recovery, DFS, disease-free survival; F, female; Hb, hemoglobin; mo, months; NA, not applicable; NR, not reported, OS, overall survival; PB, peripheral blood; Plts, platelet count; W, Caucasian; WBC, white blood count.

<sup>a</sup> Patient underwent allogeneic hematopoietic stem cell transplant in first complete remission.

**Supplementary Table S4.** Cytogenetic, hematologic and clinical characteristics and treatment outcomes of previously reported adult patients with t(11;19)(q23;p13.1) for whom outcome data are available

| Study/Case no. <sup>a</sup>                                               | Age/<br>Sex | Race  | Karyotype                                                                                                                                             | FAB   | AML<br>type        | Hb<br>(g/dL) | Plts<br>(x10 <sup>9</sup> /L) | WBC<br>(x10 <sup>9</sup> /L) | PB/BM<br>blasts<br>(%) | Organ<br>involvement | Res-<br>ponse | DFS<br>(mo) | OS<br>(mo) |
|---------------------------------------------------------------------------|-------------|-------|-------------------------------------------------------------------------------------------------------------------------------------------------------|-------|--------------------|--------------|-------------------------------|------------------------------|------------------------|----------------------|---------------|-------------|------------|
| <i>Patients with t(11;19)(q23;p13.1) as a sole chromosome abnormality</i> |             |       |                                                                                                                                                       |       |                    |              |                               |                              |                        |                      |               |             |            |
| Cerveira <sup>28</sup> /5                                                 | 47/F        | NR    | 46,XX,t(11;19)(q23;p13.1)[22]                                                                                                                         | M5    | t-AML              | 9            | 83                            | 107                          | 1/44                   | No                   | No<br>CR      | NA          | 4          |
| De Braekeleer <sup>29</sup> /P9                                           | 50/F        | NR    | 46,XX,t(11;19)(q23;p13)[25]/<br>46,XX[3] <sup>b</sup>                                                                                                 | M2    | t-AML              | 8.8          | 162                           | 6.1                          | 22/38                  | No                   | No<br>CR      | NA          | 5          |
| De Braekeleer <sup>29</sup> /<br>P10                                      | 51/F        | NR    | 46,XX,t(11;19)(q23;p13.1)[19]/<br>46,XX[4] <sup>b</sup>                                                                                               | M2    | s-AML              | 7.1          | 84                            | 68                           | 8/20                   | No                   | CR            | 35          | 38         |
| Huh <sup>30</sup> /S13                                                    | 57/F        | Asian | 46,XX,t(11;19)(q23;p13.1)[16]/<br>46,XX[4]                                                                                                            | NR    | t-AML              | NR           | NR                            | NR                           | NR                     | NR                   | CR            | 10          | NR         |
| Huret <sup>31</sup> /11                                                   | 53/F        | NR    | 46,XX,t(11;19)(q23;p13.1)                                                                                                                             | M4    | t-AML              | 10.1         | 51                            | 1                            | 0/NR                   | No                   | CR            | 12+         | 15+        |
| Huret <sup>31</sup> /14                                                   | 63/F        | NR    | 46,XX,t(11;19)(q23;p13.1)                                                                                                                             | M1/M2 | t-AML              | 10           | 50                            | 24                           | 45/NR                  | No                   | PR            | NA          | 3          |
| Kakahana <sup>32</sup> /1                                                 | 77/M        | Asian | 46,XY,t(11;19)(q23;p13.1)                                                                                                                             | NR    | s-AML              | NR           | NR                            | NR                           | NR/20                  | NR                   | CR            | NR          | 15         |
| Kondo <sup>33</sup> /33                                                   | 42/M        | Asian | 46,XY,t(11;19)(q23;p13.1)                                                                                                                             | NR    | <i>de<br/>novo</i> | NR           | NR                            | NR                           | NR                     | NR                   | No<br>CR      | NA          | 49.8+      |
| Manola <sup>34</sup> /1                                                   | 46/F        | NR    | <u>Diagnosis:</u><br>46,XX,t(11;19)(q23;p13.1)[10]/<br>46,XX[13]<br><u>Relapse:</u><br>46,XX,t(11;19)(q23;p13.1)[5]/<br>46,idem,t(12;12)(p13;q13)[15] | M2    | t-AML              | 8.8          | 40                            | 1.06                         | 0/35                   | No                   | CR            | 8           | 14+        |
| Moorman <sup>35</sup> /128                                                | 50/M        | NR    | 46,XY,t(11;19)(q23;p13.1)                                                                                                                             | M2    | <i>de<br/>novo</i> | NR           | NR                            | 3                            | NR                     | NR                   | CR            | NR          | 26.5       |
| Moorman <sup>35</sup> /129                                                | 63/M        | NR    | 46,XY,t(11;19)(q23;p13.1)                                                                                                                             | M4    | <i>de<br/>novo</i> | NR           | NR                            | 16                           | NR                     | NR                   | CR            | NR          | 14.1       |
| Moorman <sup>35</sup> /136                                                | 36/M        | NR    | 46,XY,t(11;19)(q23;p13.1)                                                                                                                             | M4    | <i>de<br/>novo</i> | NR           | NR                            | 10                           | NR                     | NR                   | CR            | NR          | 13.4+      |
| Moorman <sup>35</sup> /279                                                | 17/M        | NR    | 46,XY,t(11;19)(q23;p13.1)                                                                                                                             | M1    | <i>de<br/>novo</i> | NR           | NR                            | 56                           | NR                     | NR                   | CR            | NR          | 5.4        |
| Moorman <sup>35</sup> /313                                                | 30/F        | NR    | 46,XX,t(11;19)(q23;p13.1)                                                                                                                             | M4    | <i>de<br/>novo</i> | NR           | NR                            | NR                           | NR                     | NR                   | CR            | NR          | 3.4+       |
| Moorman <sup>35</sup> /365                                                | 53/F        | NR    | 46,XX,t(11;19)(q23;p13.1)                                                                                                                             | M4    | s-AML              | NR           | NR                            | 3                            | NR                     | NR                   | CR            | NR          | 52.9       |
| Moorman <sup>35</sup> /372                                                | 66/M        | NR    | 46,XY,t(11;19)(q23;p13.1)                                                                                                                             | M4    | s-AML              | NR           | NR                            | 28                           | NR                     | NR                   | No<br>CR      | NA          | 7.2        |

| Study/Case no. <sup>a</sup>       | Age/<br>Sex | Race  | Karyotype                                                                                                           | FAB | AML<br>type    | Hb<br>(g/dL) | Plts<br>(x10 <sup>9</sup> /L) | WBC<br>(x10 <sup>9</sup> /L) | PB/BM<br>blasts<br>(%) | Organ<br>involve-<br>ment | Res-<br>ponse | DFS<br>(mo) | OS<br>(mo)          |
|-----------------------------------|-------------|-------|---------------------------------------------------------------------------------------------------------------------|-----|----------------|--------------|-------------------------------|------------------------------|------------------------|---------------------------|---------------|-------------|---------------------|
| Moorman <sup>35</sup> /378        | 63/F        | NR    | 46,XX,t(11;19)(q23;p13.1)                                                                                           | M4  | <i>de novo</i> | NR           | NR                            | 6                            | NR                     | NR                        | CR            | NR          | 7.3                 |
| Moorman <sup>35</sup> /382        | 60/F        | NR    | 46,XX,t(11;19)(q23;p13.1)                                                                                           | M2  | s-AML          | NR           | NR                            | 1                            | NR                     | NR                        | CR            | NR          | 19.3                |
| Moorman <sup>35</sup> /383        | 32/F        | NR    | 46,XX,t(11;19)(q23;p13.1)                                                                                           | M5  | <i>de novo</i> | NR           | NR                            | 5                            | NR                     | NR                        | CR            | NR          | 36.2+               |
| Moorman <sup>35</sup> /388        | 60/M        | NR    | 46,XY,t(11;19)(q23;p13.1)                                                                                           | NR  | <i>de novo</i> | NR           | NR                            | 12                           | NR                     | NR                        | CR            | NR          | 12.5+               |
| Moorman <sup>35</sup> /466        | 61/F        | NR    | 46,XX,t(11;19)(q23;p13.1)                                                                                           | M2  | s-AML          | NR           | NR                            | 161                          | NR                     | NR                        | CR            | NR          | 16.5                |
| Moorman <sup>35</sup> /468        | 18/M        | NR    | 46,XY,t(11;19)(q23;p13.1)                                                                                           | M1  | <i>de novo</i> | NR           | NR                            | 7                            | NR                     | NR                        | CR            | NR          | 6.6                 |
| Moorman <sup>35</sup> /470        | 60/F        | NR    | 46,XX,t(11;19)(q23;p13.1)                                                                                           | M5a | <i>de novo</i> | NR           | NR                            | 55                           | NR                     | NR                        | CR            | NR          | 35+                 |
| Muto <sup>36</sup> /1             | 35/F        | Asian | 46,XX,t(11;19)(q23;p13.1)                                                                                           | M5b | <i>de novo</i> | NR           | NR                            | 56.5                         | NR                     | NR                        | CR            | NR          | 15.8 <sup>c</sup>   |
| Muto <sup>36</sup> /2             | 31/M        | Asian | 46,XY,t(11;19)(q23;p13.1)                                                                                           | M5b | <i>de novo</i> | NR           | NR                            | 136.2                        | NR                     | NR                        | CR            | NR          | 9 <sup>c</sup>      |
| Muto <sup>36</sup> /3             | 33/M        | Asian | 46,XY,t(11;19)(q23;p13.1)                                                                                           | M4  | <i>de novo</i> | NR           | NR                            | 27.9                         | NR                     | NR                        | CR            | NR          | 156.6+ <sup>c</sup> |
| Muto <sup>36</sup> /5             | 33/M        | Asian | 46,XY,t(11;19)(q23;p13.1)                                                                                           | M4  | <i>de novo</i> | NR           | NR                            | 4.4                          | NR                     | NR                        | CR            | NR          | 6.3 <sup>c</sup>    |
| Muto <sup>36</sup> /6             | 16/F        | Asian | 46,XX,t(11;19)(q23;p13.1)                                                                                           | M1  | <i>de novo</i> | NR           | NR                            | 4.6                          | NR                     | NR                        | CR            | NR          | 5+ <sup>c</sup>     |
| Muto <sup>36</sup> /7             | 24/F        | Asian | 46,XX,t(11;19)(q23;p13.1)                                                                                           | M1  | <i>de novo</i> | NR           | NR                            | 0.5                          | NR                     | NR                        | CR            | NR          | 127.6+ <sup>c</sup> |
| Muto <sup>36</sup> /8             | 34/M        | Asian | 46,XY,t(11;19)(q23;p13.1)                                                                                           | M4  | <i>de novo</i> | NR           | NR                            | 9.7                          | NR                     | NR                        | CR            | NR          | 88.4 <sup>c</sup>   |
| Parkin <sup>37</sup> / MI-AML-036 | 55/M        | NR    | <u>Diagnosis:</u><br>46,XY,t(11;19)(q23;p13.1)[20]<br><u>Relapse:</u><br>46,XY,t(11;19)(q23;p13.1)[19]/<br>46,XY[1] | M4  | <i>de novo</i> | NR           | NR                            | NR                           | NR                     | NR                        | CR            | 1.3         | NR                  |
| Parkin <sup>37</sup> / MI-AML-068 | 58/F        | NR    | <u>Diagnosis:</u><br>46,XX,t(11;19)(q23;p13.1)[20]<br><u>Relapse:</u><br>46,XX,t(11;19)(q23;p13.1)[18]/<br>46,XY[2] | M4  | t-AML          | NR           | NR                            | NR                           | NR                     | NR                        | CR            | 21.6        | NR                  |

| Study/Case no. <sup>a</sup>                                                     | Age/<br>Sex | Race  | Karyotype                                                                                                                                                               | FAB | AML<br>type        | Hb<br>(g/dL)           | Plts<br>(x10 <sup>9</sup> /L) | WBC<br>(x10 <sup>9</sup> /L) | PB/BM<br>blasts<br>(%) | Organ<br>involve-<br>ment | Res-<br>ponse | DFS<br>(mo) | OS<br>(mo)          |
|---------------------------------------------------------------------------------|-------------|-------|-------------------------------------------------------------------------------------------------------------------------------------------------------------------------|-----|--------------------|------------------------|-------------------------------|------------------------------|------------------------|---------------------------|---------------|-------------|---------------------|
| Sarova <sup>38</sup> /36                                                        | 36/F        | NR    | 46,XX,t(11;19)(q23;p13.1)                                                                                                                                               | NR  | <i>de<br/>novo</i> | NR                     | NR                            | NR                           | NR                     | NR                        | NR            | NR          | 13.5                |
| Yamamoto <sup>39</sup> /1                                                       | 75/F        | Asian | <u>Diagnosis:</u><br>46,XX,t(11;19)(q23;p13.1)[18]/<br>46,XX[2] <sup>b</sup><br><u>Second relapse:</u><br>46,XX,t(11;19)(q23;p13.1)[16]/<br>46,idem,t(8;12)(q13;p13)[4] | M4  | <i>de<br/>novo</i> | 5.7                    | 43                            | 38.9                         | 58/49                  | NR                        | CR            | 8           | 21                  |
| <i>Patients with t(11;19)(q23;p13.1) and secondary chromosome abnormalities</i> |             |       |                                                                                                                                                                         |     |                    |                        |                               |                              |                        |                           |               |             |                     |
| Huret <sup>31</sup> /10                                                         | 49/F        | NR    | 47,XX,+8,t(11;19)(q23;p13.1),<br>del(13q)                                                                                                                               | M5a | <i>de<br/>novo</i> | 4.9                    | 17                            | 47                           | 71/NR                  | No                        | NE            | NA          | 0.5                 |
| Huret <sup>31</sup> /12                                                         | 56/M        | NR    | 45,XY,-7,+t(7q;10q),-10,<br>t(11;19)(q23;p13.1)                                                                                                                         | M5b | <i>de<br/>novo</i> | 12                     | 30                            | 66                           | 61/NR                  | Yes                       | CR            | NR          | 12+                 |
| Huret <sup>31</sup> /13                                                         | 59/M        | NR    | 46,XY,t(11;19)(q23;p13.1)/<br>46,idem,del(6)(p21)                                                                                                                       | M2  | <i>de<br/>novo</i> | 9.1                    | 67                            | 2                            | 6/NR                   | No                        | CR            | NR          | 39                  |
| Huret <sup>31</sup> /16                                                         | 75/F        | NR    | 46,XX,t(11;19)(q23;p13.1)/<br>47,idem,+8                                                                                                                                | M4  | <i>de<br/>novo</i> | 8.1                    | 20                            | 321                          | 74                     | Yes                       | CR            | 2           | 5                   |
| Muto <sup>36</sup> /4                                                           | 32/F        | Asian | 47,XX,t(11;19)(q23;p13.1),+8                                                                                                                                            | M1  | <i>de<br/>novo</i> | NR                     | NR                            | 0.8                          | NR                     | NR                        | CR            | NR          | 135.8+ <sup>c</sup> |
| Moorman <sup>35</sup> / 142                                                     | 38/M        | NR    | 46,XY,t(11;19)(q23;p13.1),<br>del(17)(p12)                                                                                                                              | M5b | <i>de<br/>novo</i> | NR                     | NR                            | 59                           | NR                     | NR                        | ?CR           | NR          | 0.5+                |
| Takeuchi <sup>40</sup> /1                                                       | 32/F        | Asian | 47,XX,+8,t(11;19)(q23;p13.1)<br>[20] <sup>d</sup>                                                                                                                       | M1  | <i>de<br/>novo</i> | Pan-<br>cyto-<br>penic | Pan-<br>cytope-<br>nic        | Pan-<br>cytope-<br>nic       | NR/90                  | NR                        | CR            | 16+         | NR                  |
| Vermaelen <sup>41</sup> /6                                                      | 81/M        | NR    | BM:<br>47,XY,+8,t(11;19)(q23;p13.1)<br>[10] <sup>e</sup><br>Blood:<br>46,XY,t(11;19)(q23;p13.1)[2]/<br>47,idem,+8[9] <sup>e</sup>                                       | M4  | <i>de<br/>novo</i> | NR                     | NR                            | 24.3                         | 50                     | No                        | No CR         | NA          | 0.75                |

Abbreviations: BM, bone marrow; CR, complete remission; DFS, disease-free survival; FAB, French-American-British classification; F, female; Hb, hemoglobin; M, male; mo, months; NA, not applicable; NE, not evaluable; NR, not reported; OS, overall survival; Plts, platelet count; PB, peripheral blood; PR, partial remission; s-AML, secondary AML evolving from antecedent hematologic malignancy; t-AML, therapy-related AML; WBC, white blood count.

<sup>a</sup> For each case from the literature, the first author's name and superscript reference number of the study reporting them is followed by the case number in this study.

- <sup>b</sup> This patient is positive for the *MLL/ELL* gene fusion detected using long distance inverse PCR.
- <sup>c</sup> For these cases, this is survival after transplantation.
- <sup>d</sup> This patient is positive for the *MLL/ELL* gene fusion detected using RT-PCR.
- <sup>e</sup> Translocation (11;19) reported as t(11;19)(q22;p11). The presence of t(11;19)(q23;p13.1) determined based on the Figure 1d in this report.<sup>41</sup>

**Supplementary Table S5:** Cytogenetic, hematologic and clinical characteristics and treatment outcomes of previously reported adult patients with t(11;19)(q23;p13.3) for whom outcome data are available

| Study/ Case no. <sup>a</sup>                                                      | Age/<br>Sex | Race  | Karyotype                                                                                                  | FAB | AML/<br>ALL<br>type | Hb<br>(g/dL) | Plts<br>( $\times 10^9$ /<br>L) | WBC<br>( $\times 10^9$ /<br>L) | PB/BM<br>blasts<br>(%) | Organ<br>involve-<br>ment | Res-<br>ponse | DFS<br>(mo) | OS<br>(mo) |
|-----------------------------------------------------------------------------------|-------------|-------|------------------------------------------------------------------------------------------------------------|-----|---------------------|--------------|---------------------------------|--------------------------------|------------------------|---------------------------|---------------|-------------|------------|
| <i>Patients with AML and t(11;19)(q23;p13.3) as a sole chromosome abnormality</i> |             |       |                                                                                                            |     |                     |              |                                 |                                |                        |                           |               |             |            |
| Blanco <sup>42</sup> /1                                                           | 18/M        | NR    | 46,XY,t(11;19)(q23;p13.3)                                                                                  | M4  | t-AML               | NR           | NR                              | NR                             | NR                     | NR                        | NR            | NR          | 7          |
| Cerveira <sup>28</sup> /21                                                        | 61/M        | NR    | 46,XX,t(11;19)(q23;p13.3)[15]/<br>46,XX[15]                                                                | M5  | t-AML               | 8.6          | 36                              | 65.9                           | 93/83                  | Yes                       | No CR         | NA          | 1+         |
| Naghashpour <sup>43</sup> /1                                                      | 37/M        | NR    | 46,XY,t(11;19)(q23;p13.3)[9]/<br>46,XY[11]                                                                 | NA  | MPAL                | 8.6          | 179                             | 10.6                           | 3/NR                   | No                        | CR            | 7.5+        | 9+         |
| Moorman <sup>35</sup> /117                                                        | 17/F        | NR    | 46,XX,t(11;19)(q23;p13.3)                                                                                  | M4  | <i>de<br/>novo</i>  | NR           | NR                              | NR                             | NR                     | NR                        | CR            | NR          | 9.8        |
| Moorman <sup>35</sup> /556                                                        | 30/F        | NR    | 46,XX,t(11;19)(q23;p13.3)                                                                                  | M4  | <i>de<br/>novo</i>  | NR           | NR                              | 9                              | NR                     | NR                        | CR            | NR          | 10.6+      |
| Sarova <sup>38</sup> /28                                                          | 43/M        | NR    | 46,XY,t(11;19)(q23;p13.3)[19]/<br>46,XY[3]                                                                 | M1  | s-AML               | NR           | NR                              | NR                             | NR                     | NR                        | NR            | NR          | 0.7        |
| Sarova <sup>38</sup> /34                                                          | 42/M        | NR    | 46,XY,t(11;19)(q23;p13.3)[18]/<br>46,XY[4]                                                                 | M5a | <i>de<br/>novo</i>  | NR           | NR                              | NR                             | NR                     | NR                        | NR            | NR          | 21+        |
| Sarova <sup>38</sup> /35                                                          | 31/M        | NR    | 46,XY,t(11;19)(q23;p13.3)[18]/<br>46,XY[3]                                                                 | NR  | <i>de<br/>novo</i>  | NR           | NR                              | NR                             | NR                     | NR                        | NR            | NR          | 14.3       |
| Shen <sup>44</sup> /1                                                             | 18/M        | Asian | 46,XY,t(11;19)(q23;p13.3)                                                                                  | M5b | t-AML               | 10.3         | 54                              | 202.6                          | 90                     | Gums,<br>Skin             | No CR         | NA          | 3          |
| Suehiro <sup>45</sup> /1                                                          | 76/M        | Asian | 46,XY,t(11;19)(q23;p13.3)[20]                                                                              | M0  | t-AML               | 8.2          | 26                              | 3.2                            | 51/84                  | NR                        | NR            | NR          | 3          |
| Zhang <sup>46</sup> /1                                                            | 37/M        | NR    | 46,XY,t(11;19)(q23;p13.3)[7]/<br>46,XY[5]                                                                  | M5a | t-AML               | NR           | NR                              | 74.6                           | 92/NR                  | No                        | NR            | NA          | 2          |
| Cerveira <sup>28</sup> /22                                                        | 59/M        | NR    | 46,XY,t(11;19)(q23;p13.3),<br>add(12)(p12)[10]/46,XY[10]                                                   | NA  | AMDC<br>L           | 11.6         | 136                             | 1.2                            | NA/81                  | Yes                       | CR            | 11          | 13         |
| Cerveira <sup>28</sup> /23                                                        | 68/M        | NR    | 47,XY,der(2)t(1;2)(q21;q37),<br>+i(8)(q10),t(11;19)(q23;p13.3)<br>47,idem,+8,-i(8)(q10)[3]                 | M5  | <i>de<br/>novo</i>  | 8.1          | 9                               | 0.1                            | NA/37.<br>5            | No                        | No CR         | NA          | 23         |
| Chin <sup>47</sup> /1                                                             | 24/F        | NR    | 46,XX,t(11;19)(q23;p13.3),<br>der(22)(22pter→22q13:<br>:19p11→19p13.3::11q23→<br>11qter)[3]/45,idem,-X[19] | NR  | t-AML               | 8.9          | 31                              | NR                             | NR/90                  | NR                        | CR            | NR          | NR         |

| Study/ Case no. <sup>a</sup>                                                            | Age/<br>Sex | Race  | Karyotype                                                                                                                                                                                                                                                                                                                                     | FAB      | AML/<br>ALL<br>type | Hb<br>(g/dL) | Plts<br>(x10 <sup>9</sup> /<br>L) | WBC<br>(x10 <sup>9</sup> /<br>L) | PB/BM<br>blasts<br>(%) | Organ<br>involve-<br>ment | Res-<br>ponse | DFS<br>(mo) | OS<br>(mo) |
|-----------------------------------------------------------------------------------------|-------------|-------|-----------------------------------------------------------------------------------------------------------------------------------------------------------------------------------------------------------------------------------------------------------------------------------------------------------------------------------------------|----------|---------------------|--------------|-----------------------------------|----------------------------------|------------------------|---------------------------|---------------|-------------|------------|
| <i>Patients with AML and t(11;19)(q23;p13.3) and secondary chromosome abnormalities</i> |             |       |                                                                                                                                                                                                                                                                                                                                               |          |                     |              |                                   |                                  |                        |                           |               |             |            |
| Cigudosa <sup>48</sup> /1                                                               | 73/<br>M    | NR    | 37~58,XX,der(3)t(3;21)(q11.2;<br>q11.2),del(5)(q12q33),+8,<br>der(8)t(8;11)(p21;p11.2)t(8;12)<br>(q22;q13),t(11;19)(q23;p13.3),<br>der(12)t(12;18)(q24;q11.2),<br>der(16)t(3;16)(?;p11.2),der(18)<br>t(3;18)(?;q21),der(19)ins(19;<br>17)(p13.1;?)t(3;19)(q11.2;<br>p13.3),r(11)x2amp(MLL)                                                    | M6       | <i>de<br/>novo</i>  | NR           | NR                                | NR                               | NR                     | NR                        | NR            | NR          | 1          |
| De<br>Braekeleer <sup>29</sup> /P8                                                      | 44/F        | NR    | 49,XX,+8,+8,+8,t(11;19)(q23;<br>p13)[25] <sup>b</sup>                                                                                                                                                                                                                                                                                         | M5       | <i>de<br/>novo</i>  | NR           | NR                                | NR                               | NR                     | NA                        | CR            | NR          | 16+        |
| Moorman <sup>35</sup> /64                                                               | 25/F        | NR    | 46,XX,t(11;19)(q23;p13.3)/<br>47,idem,+8/47,idem,+mar                                                                                                                                                                                                                                                                                         | M2       | <i>de<br/>novo</i>  | NR           | NR                                | 8                                | NR                     | NR                        | CR            | NR          | 55.4       |
| Moorman <sup>35</sup> / 373                                                             | 74/<br>M    | NR    | 46,XY,t(11;19)(q23;p13.3)/<br>46,XY,-7,der(11)t(11;19),-19,<br>+mar,+r                                                                                                                                                                                                                                                                        | M5a      | <i>de<br/>novo</i>  | NR           | NR                                | 20                               | NR                     | NR                        | CR            | NR          | 3.6        |
| Moorman <sup>35</sup> / 402                                                             | 23/<br>M    | NR    | 47,XY,t(11;19)(q23;p13.3),+21                                                                                                                                                                                                                                                                                                                 | M1       | <i>de<br/>novo</i>  | NR           | NR                                | 94                               | NR                     | NR                        | CR            | NR          | 5.4+       |
| Moorman <sup>35</sup> / 578                                                             | 20/F        | NR    | 48,XX,add(6)(q23),+8,t(11;19)<br>(q23;p13.3),+der(19)t(11;19)                                                                                                                                                                                                                                                                                 | M6       | <i>de<br/>novo</i>  | NR           | NR                                | 92                               | NR                     | NR                        | CR            | NR          | 106.1+     |
| Moorman <sup>35</sup> / 604                                                             | 75/<br>M    | NR    | 45,XY,-7,t(11;19)(q23;p13.3)                                                                                                                                                                                                                                                                                                                  | NA       | AL                  | NR           | NR                                | 1                                | NR                     | NR                        | CR            | NR          | 3.8+       |
| Ninomiya <sup>49</sup> /1                                                               | 34/F        | Asian | 46,XX,t(11;19)(q23;p13),<br>add(12)(p11)[10]/46,idem,i(21)<br>(q10)[5]/46,idem,add(21)<br>(q22)[5] <sup>c</sup>                                                                                                                                                                                                                               | NA       | t-AML               | NR           | NR                                | NR                               | NR                     | NR                        | CR            | 2           | 6          |
| Vendrame-<br>Goloni <sup>50</sup> /1                                                    | 18/F        | NR    | <u>Diagnosis:</u><br>43~46,XX,t(5;16)(q13;q22),<br>t(11;19)(q23;p13.3)[cp11]/<br>46,XX[8]<br><u>Second relapse:</u><br>33~46,XX,-X[4],del(1)(q21)<br>[16],t(5;16)(q13;q22)[17],-8[5],<br>-10[3],t(11;19)(q25;p13.3)[17],<br>del(12)(p12)[17],-15[4],<br>der(17)t(1;17)(q21; q21)[17],<br>i(17)(q10)[17],-18[5],-20[4],<br>-21[3],-22[6][cp17] | M4e<br>o | <i>de<br/>novo</i>  | 9.4          | 41                                | 63.4                             | 64/NR                  | No                        | CR            | 7           | 24         |



| Study/ Case no. <sup>a</sup>                                                            | Age/ Sex | Race  | Karyotype                                                                                                           | FAB | AML/ ALL type | Hb (g/dL) | Plts (x10 <sup>9</sup> /L) | WBC (x10 <sup>9</sup> /L) | PB/BM blasts (%) | Organ involvement | Response                | DFS (mo) | OS (mo) |
|-----------------------------------------------------------------------------------------|----------|-------|---------------------------------------------------------------------------------------------------------------------|-----|---------------|-----------|----------------------------|---------------------------|------------------|-------------------|-------------------------|----------|---------|
| <i>Patients with ALL and t(11;19)(q23;p13.3) as a sole chromosome abnormality</i>       |          |       |                                                                                                                     |     |               |           |                            |                           |                  |                   |                         |          |         |
| Moorman <sup>35</sup> /336                                                              | 67/F     | NR    | 46,XX,t(11;19)(q23;p13.3)                                                                                           | NR  | Pro-B ALL     | NR        | NR                         | 257                       | NR               | NR                | CR                      | NR       | 4.2+    |
| Moorman <sup>35</sup> /420                                                              | 19/M     | NR    | 46,XY,t(11;19)(q23;p13.3)                                                                                           | NR  | T-ALL         | NR        | NR                         | 218                       | NR               | NR                | CR                      | NR       | 53.8+   |
| Rubnitz <sup>51</sup> /9                                                                | 15.2/M   | B     | 46,XY,t(11;19)(q23;p13.3)                                                                                           | NR  | T-ALL         | NR        | NR                         | 496                       | NR               | NR                | CR                      | NR       | 24+     |
| Wright <sup>52</sup> /1                                                                 | 33/M     | W     | <u>Diagnosis:</u><br>46,XY,t(11;19)(q23;p13.3)<br><u>Relapse:</u><br>46,XY,t(11;19)(q23;p13.3),<br>t(3;16)(q23;p13) | L2  | T-ALL         | NR        | NR                         | 173                       | 86/NR            | Lymph nodes       | PR                      | NA       | 38+     |
| <i>Patients with ALL and t(11;19)(q23;p13.3) and secondary chromosome abnormalities</i> |          |       |                                                                                                                     |     |               |           |                            |                           |                  |                   |                         |          |         |
| Finke <sup>53</sup> /P1                                                                 | 31/M     | NR    | 47,XY,+X,i(7)(q10),t(11;19)(q23;p13) <sup>d</sup>                                                                   | NR  | AL            | NR        | NR                         | NR                        | NR               | NR                | CR                      | NR       | 36+     |
| Moorman <sup>35</sup> /122                                                              | 17/F     | NR    | 47,XX,t(11;19)(q23;p13.3),+17,?add(21)(q22)                                                                         | NR  | T-ALL         | NR        | NR                         | 117                       | NR               | NR                | CR                      | NR       | 6.1+    |
| Rubnitz <sup>51</sup> /10                                                               | 17/M     | W     | 46,XY,del(4)(q21),del(9)(p13),dic(9;13)(p12;p12),t(11;19)(q23;p13.3),+19,+20,-22                                    | NR  | T-ALL         | NR        | NR                         | 6                         | NR               | NR                | ? lineage switch to AML | 14.4     | NR      |
| Rubnitz <sup>51</sup> /11                                                               | 16.6/M   | B     | 47,XY,+8,t(11;19)(q23;p13.3)                                                                                        | NR  | B-ALL         | NR        | NR                         | 73                        | NR               | NR                | CR                      | 12       | NR      |
| Rubnitz <sup>51</sup> /11                                                               | 18/F     | W     | 46,XX,add(10)(q24),t(11;19)(q23;p13.3)                                                                              | NR  | T-ALL         | NR        | NR                         | 80                        | NR               | NR                | CR                      | NR       | 22.8+   |
| Yoo <sup>54</sup> /1                                                                    | 41/F     | Asian | 47,XX,+X,t(11;19)(q23;p13.3)[4]/46,XX[16]                                                                           | NR  | t-B-ALL       | 5.8       | 31                         | 3.5                       | 15/95            | No                | CR                      | 3        | NR      |

Abbreviations: AL, acute leukemia; AMDCL, acute myeloid dendritic cell leukemia; BM, bone marrow; CR, complete remission; DFS, disease-free survival; FAB, French-American-British classification; F, female; Hb, hemoglobin; M, male; MPAL, mixed phenotype acute leukemia; mo, months; NR, not reported; NA, not applicable; OS, overall survival; PB, peripheral blood; Plts, platelet count; PR, partial remission; s-AML, secondary AML evolving from antecedent hematologic malignancy; t-B-ALL, therapy-related B-ALL; t-AML, therapy-related AML; WBC, white blood count.

<sup>a</sup> For each case from the literature, the first author's name and superscript reference number of the study reporting them is followed by the case number in this study.

<sup>b</sup> This patient is positive for the *MLL/MLL1* gene fusion detected using long distance inverse PCR.

<sup>c</sup> This patient is positive for the *MLL/MLL1* gene fusion detected using RT-PCR.

<sup>d</sup> The presence of t(11;19)(q23;p13.3) was determined based on Figure 1 in Finke *et al.*<sup>53</sup>

**Supplementary Table S6.** Comparison of selected genetic changes between AML patients with t(11;19)(q23;p13.1) and those with t(11;19)(q23;p13.3)<sup>a</sup>

| Characteristic  | t(11;19)(q23;p13.1)<br>(n=13) | t(11;19)(q23;p13.3)<br>(n=8) | P-value <sup>b</sup> |
|-----------------|-------------------------------|------------------------------|----------------------|
| ASXL1, n (%)    |                               |                              | 0.38                 |
| Mutated         | 0 (0)                         | 1 (13)                       |                      |
| Wild type       | 13 (100)                      | 7 (87)                       |                      |
| ETV6, n (%)     |                               |                              | 0.38                 |
| Mutated         | 0 (0)                         | 1 (13)                       |                      |
| Wild type       | 13 (100)                      | 7 (87)                       |                      |
| FLT3-TKD, n (%) |                               |                              | 0.50                 |
| Present         | 2 (15)                        | 0 (0)                        |                      |
| Absent          | 11 (85)                       | 8 (100)                      |                      |
| GATA2, n (%)    |                               |                              | 0.38                 |
| Mutated         | 0 (0)                         | 1 (13)                       |                      |
| Wild type       | 13 (100)                      | 7 (87)                       |                      |
| KIT, n (%)      |                               |                              | 0.38                 |
| Mutated         | 0 (0)                         | 1 (13)                       |                      |
| Wild type       | 13 (100)                      | 7 (87)                       |                      |
| KRAS, n (%)     |                               |                              | 1.00                 |
| Mutated         | 1 (8)                         | 0 (0)                        |                      |
| Wild type       | 12 (92)                       | 8 (100)                      |                      |
| NRAS, n (%)     |                               |                              | 1.00                 |
| Mutated         | 1 (8)                         | 0 (0)                        |                      |
| Wild type       | 12 (92)                       | 8 (100)                      |                      |
| SF1, n (%)      |                               |                              | 0.38                 |
| Mutated         | 0 (0)                         | 1 (13)                       |                      |
| Wild type       | 13 (100)                      | 7 (87)                       |                      |
| SMC3, n (%)     |                               |                              | 0.38                 |
| Mutated         | 0 (0)                         | 1 (13)                       |                      |
| Wild type       | 13 (100)                      | 7 (87)                       |                      |
| TET2, n (%)     |                               |                              | 1.00                 |
| Mutated         | 3 (23)                        | 1 (13)                       |                      |
| Wild type       | 10 (77)                       | 7 (87)                       |                      |
| U2AF1, n (%)    |                               |                              | 0.38                 |
| Mutated         | 0 (0)                         | 1 (13)                       |                      |
| Wild type       | 13 (100)                      | 7 (87)                       |                      |

Abbreviation: FLT3-TKD, tyrosine kinase domain mutation in the FLT3 gene.

<sup>a</sup> Only those genes mutated in at least one patient are listed in this Table. No mutations were detected in the BCOR, BCORL1, CBL, CEBPA, DNMT3A, EZH2, IDH1, IDH2, NPM1, PHF6, PTPN11, RAD21, RUNX1, SF3A1, SF3B1, SMC1A, SRSF2, STAG2, TP53, U2AF2, WT1 or ZRSR2 genes. No patient was found to harbor FLT3-ITD. Specific nucleotide and amino acid changes are given in Supplementary Table S7.

<sup>b</sup> P-values for categorical variables are from Fisher's exact test.

**Supplementary Table S7.** Gene mutations in patients with t(11;19) rearrangements

| <i>Gene</i>                                                                                                                                                                                                                                                                                                                                                                                                                | <i>Chromosome</i> | <i>Base change (GRCh37)<sup>a</sup></i>                                                                          | <i>Mutation<sup>b</sup></i>                            |
|----------------------------------------------------------------------------------------------------------------------------------------------------------------------------------------------------------------------------------------------------------------------------------------------------------------------------------------------------------------------------------------------------------------------------|-------------------|------------------------------------------------------------------------------------------------------------------|--------------------------------------------------------|
| <i>ASXL1</i>                                                                                                                                                                                                                                                                                                                                                                                                               | 20                | 31022441 A>AG                                                                                                    | p.G643G                                                |
| <i>ETV6</i>                                                                                                                                                                                                                                                                                                                                                                                                                | 12                | 12037393 TG>T                                                                                                    | p.W342*                                                |
| <i>FLT3</i>                                                                                                                                                                                                                                                                                                                                                                                                                | 13                | 28592640 A>C<br>28592640 A>T                                                                                     | p.D835E                                                |
| <i>GATA2</i>                                                                                                                                                                                                                                                                                                                                                                                                               | 3                 | 128202792 CG>C                                                                                                   | p.D309                                                 |
| <i>KIT</i>                                                                                                                                                                                                                                                                                                                                                                                                                 | 4                 | 55599321 A>T                                                                                                     | p.D816V                                                |
| <i>KRAS</i>                                                                                                                                                                                                                                                                                                                                                                                                                | 12                | 25380275 T>G                                                                                                     | p.Q61H                                                 |
| <i>NRAS</i>                                                                                                                                                                                                                                                                                                                                                                                                                | 1                 | 115258747 C>T                                                                                                    | p.G12D                                                 |
| <i>SF1</i>                                                                                                                                                                                                                                                                                                                                                                                                                 | 11                | 64534502 AGGC>A                                                                                                  | p.PP457P                                               |
| <i>SMC3</i>                                                                                                                                                                                                                                                                                                                                                                                                                | 10                | 112361552 GAAGA>G                                                                                                | p.KK935                                                |
| <i>TET2</i>                                                                                                                                                                                                                                                                                                                                                                                                                | 4                 | 106158364 GAA>G <sup>c</sup><br>106164832 GA>G <sup>c</sup><br>106156458 TA>T<br>106156446 GA>G<br>106164914 G>A | p.E1089*<br>p.E1234*<br>p.K454*<br>p.K450*<br>p.R1261H |
| <i>U2AF1</i>                                                                                                                                                                                                                                                                                                                                                                                                               | 21                | 44514777 T>G                                                                                                     | Q84P                                                   |
| No mutations were detected in the <i>BCOR</i> , <i>BCORL1</i> , <i>CBL</i> , <i>CEBPA</i> , <i>DNMT3A</i> , <i>EZH2</i> , <i>IDH1</i> , <i>IDH2</i> , <i>NPM1</i> , <i>PHF6</i> , <i>PTPN11</i> , <i>RAD21</i> , <i>RUNX1</i> , <i>SF3A1</i> , <i>SF3B1</i> , <i>SMC1A</i> , <i>SRSF2</i> , <i>STAG2</i> , <i>TP53</i> , <i>U2AF2</i> , <i>WT1</i> or <i>ZRSR2</i> genes. No patient was found to harbor <i>FLT3</i> -ITD. |                   |                                                                                                                  |                                                        |

<sup>a</sup> Each line corresponds to a separate patient

<sup>b</sup> Asterisk indicates introduction of stop codon.

<sup>c</sup> Both mutations were found in the same patient

**Supplementary Table S8.** Comparison between results of cytogenetic analysis and RNA sequencing

| Patient no. | Cytogenetic Group   | RNA sequencing |                  |              |
|-------------|---------------------|----------------|------------------|--------------|
|             |                     | 11q23 gene     | 19p13 gene (TPG) | TPG location |
| 5           | t(11;19)(q23;p13.1) | <i>KMT2A</i>   | <i>ELL</i>       | 19p13.1      |
| 6           | t(11;19)(q23;p13.1) | ND             | ND               | ND           |
| 14          | t(11;19)(q23;p13.1) | <i>KMT2A</i>   | <i>ELL</i>       | 19p13.1      |
| 15          | t(11;19)(q23;p13.1) | <i>KMT2A</i>   | <i>ELL</i>       | 19p13.1      |
| 16          | t(11;19)(q23;p13.1) | <i>KMT2A</i>   | <i>ELL</i>       | 19p13.1      |
| 18          | t(11;19)(q23;p13.1) | <i>KMT2A</i>   | <i>ELL</i>       | 19p13.1      |
| 20          | t(11;19)(q23;p13.3) | <i>KMT2A</i>   | <i>MLLT1</i>     | 19p13.3      |
| 21          | t(11;19)(q23;p13.3) | <i>KMT2A</i>   | <i>MLLT1</i>     | 19p13.3      |
| 24          | t(11;19)(q23;p13.3) | <i>KMT2A</i>   | <i>MLLT1</i>     | 19p13.3      |
| 27          | t(11;19)(q23;p13.3) | <i>KMT2A</i>   | <i>MLLT1</i>     | 19p13.3      |
| 28          | t(11;19)(q23;p13.3) | <i>KMT2A</i>   | <i>MLLT1</i>     | 19p13.3      |
| 30          | t(11;19)(q23;p13.3) | <i>KMT2A</i>   | <i>MLLT1</i>     | 19p13.3      |
| 31          | t(11;19)(q23;p13.3) | <i>KMT2A</i>   | <i>MLLT1</i>     | 19p13.3      |

Abbreviations: TPG, translocation partner gene; ND, none detected.

The two cases with gene expression profiles reminiscent of the other translocation group are shaded with colors used in the PCA plot [yellow for t(11;19)(q23;p13.1) and blue for t(11;19)(q23;p13.3)].

In case no. 6, no fusion between *KMT2A* and any gene located between 19p13.1 and 19p13.3 could be detected likely due to sampling.

**Supplementary Table S9.** Genes differentially expressed between t(11;19)(q23;p13.1) and t(11;19)(q23;p13.3) with two aberrant cases removed from analysis

| 281 Genes upregulated in t(11;19)(q23;p13.3) compared to t(11;19)(q23;p13.1) |        |        |        |         |                                                                                                        |
|------------------------------------------------------------------------------|--------|--------|--------|---------|--------------------------------------------------------------------------------------------------------|
| Symbol                                                                       | Chrom. | Band   | log2FC | q-value | Description                                                                                            |
| RP11-245G13.2                                                                | 2      | p25.1  | 5.38   | 0.00531 |                                                                                                        |
| LINC00086                                                                    | X      | q26.3  | 5.17   | 0.00875 | long intergenic non-protein coding RNA 86 [Source:HGNC Symbol;Acc:HGNC:34499]                          |
| ADCY1                                                                        | 7      | p12.3  | 5.15   | 0.00932 | adenylate cyclase 1 (brain) [Source:HGNC Symbol;Acc:HGNC:232]                                          |
| MSX2                                                                         | 5      | q35.2  | 3.60   | 0       | msh homeobox 2 [Source:HGNC Symbol;Acc:HGNC:7392]                                                      |
| THNSL2                                                                       | 2      | p11.2  | 3.20   | 0.00002 | threonine synthase-like 2 ( <i>S. cerevisiae</i> ) [Source:HGNC Symbol;Acc:HGNC:25602]                 |
| HRC                                                                          | 19     | q13.33 | 3.20   | 0.00009 | histidine rich calcium binding protein [Source:HGNC Symbol;Acc:HGNC:5178]                              |
| GOLGA8J                                                                      | 15     | q13.2  | 2.85   | 0.00001 | golgin A8 family, member J [Source:HGNC Symbol;Acc:HGNC:38650]                                         |
| GATM                                                                         | 15     | q21.1  | 2.84   | 0.00001 | glycine amidinotransferase (L-arginine:glycine amidinotransferase) [Source:HGNC Symbol;Acc:HGNC:4175]  |
| ZNF300                                                                       | 5      | q33.1  | 2.82   | 0       | zinc finger protein 300 [Source:HGNC Symbol;Acc:HGNC:13091]                                            |
| C10orf35                                                                     | 10     | q22.1  | 2.81   | 0       | chromosome 10 open reading frame 35 [Source:HGNC Symbol;Acc:HGNC:23519]                                |
| CTD-2376I4.2                                                                 | 5      | q13.2  | 2.67   | 0.00104 |                                                                                                        |
| PPAPDC3                                                                      | 9      | q34.13 | 2.65   | 0.00074 | phosphatidic acid phosphatase type 2 domain containing 3 [Source:HGNC Symbol;Acc:HGNC:28174]           |
| DNAH10                                                                       | 12     | q24.31 | 2.65   | 0.00117 | dynein, axonemal, heavy chain 10 [Source:HGNC Symbol;Acc:HGNC:2941]                                    |
| CYP2F1                                                                       | 19     | q13.2  | 2.63   | 0.00007 | cytochrome P450, family 2, subfamily F, polypeptide 1 [Source:HGNC Symbol;Acc:HGNC:2632]               |
| OTOF                                                                         | 2      | p23.3  | 2.62   | 0.00203 | otoferlin [Source:HGNC Symbol;Acc:HGNC:8515]                                                           |
| LAMA3                                                                        | 18     | q11.2  | 2.61   | 0       | laminin, alpha 3 [Source:HGNC Symbol;Acc:HGNC:6483]                                                    |
| MAPK15                                                                       | 8      | q24.3  | 2.58   | 0.00075 | mitogen-activated protein kinase 15 [Source:HGNC Symbol;Acc:HGNC:24667]                                |
| RP3-388E23.2                                                                 | 6      | q23.3  | 2.50   | 0       |                                                                                                        |
| GOLGA8M                                                                      | 15     | q13.1  | 2.42   | 0       | golgin A8 family, member M [Source:HGNC Symbol;Acc:HGNC:44404]                                         |
| APOC4-APOC2                                                                  | 19     | q13.32 | 2.42   | 0.00005 | APOC4-APOC2 readthrough (NMD candidate) [Source:HGNC Symbol;Acc:HGNC:44426]                            |
| DISC1FP1                                                                     | 11     | q14.3  | 2.42   | 0.00949 | DISC1 fusion partner 1 (non-protein coding) [Source:HGNC Symbol;Acc:HGNC:33625]                        |
| MYOZ1                                                                        | 10     | q22.2  | 2.26   | 0.00436 | myozenin 1 [Source:HGNC Symbol;Acc:HGNC:13752]                                                         |
| CAMK2B                                                                       | 7      | p13    | 2.21   | 0.00491 | calcium/calmodulin-dependent protein kinase II beta [Source:HGNC Symbol;Acc:HGNC:1461]                 |
| APOC2                                                                        | 19     | q13.32 | 2.19   | 0.00032 | apolipoprotein C-II [Source:HGNC Symbol;Acc:HGNC:609]                                                  |
| TRPM4                                                                        | 19     | q13.33 | 2.18   | 0       | transient receptor potential cation channel, subfamily M, member 4 [Source:HGNC Symbol;Acc:HGNC:17993] |

|                       |    |        |      |         |                                                                                          |
|-----------------------|----|--------|------|---------|------------------------------------------------------------------------------------------|
| <i>OVOL1</i>          | 11 | q13.1  | 2.17 | 0.00022 | ovo-like zinc finger 1 [Source:HGNC Symbol;Acc:HGNC:8525]                                |
| <i>RP11-114J13.1</i>  | 5  | q23.2  | 2.16 | 0.00672 |                                                                                          |
| <i>LA16c-349E10.1</i> | 16 | p13.3  | 2.14 | 0       |                                                                                          |
| <i>KLHDC9</i>         | 1  | q23.3  | 2.12 | 0.00009 | kelch domain containing 9 [Source:HGNC Symbol;Acc:HGNC:28489]                            |
| <i>ANKRD20A1</i>      | 9  | q21.11 | 2.11 | 0       | ankyrin repeat domain 20 family, member A1 [Source:HGNC Symbol;Acc:HGNC:23665]           |
| <i>GOLGA6D</i>        | 15 | q24.2  | 2.11 | 0.00024 | golgin A6 family, member D [Source:HGNC Symbol;Acc:HGNC:32204]                           |
| <i>ZNF532</i>         | 18 | q21.32 | 2.10 | 0       | zinc finger protein 532 [Source:HGNC Symbol;Acc:HGNC:30940]                              |
| <i>TUSC1</i>          | 9  | p21.2  | 2.08 | 0.00183 | tumor suppressor candidate 1 [Source:HGNC Symbol;Acc:HGNC:31010]                         |
| <i>EDA2R</i>          | X  | q12    | 2.04 | 0.00506 | ectodysplasin A2 receptor [Source:HGNC Symbol;Acc:HGNC:17756]                            |
| <i>LINC00475</i>      | 9  | q22.31 | 2.03 | 0.00363 | long intergenic non-protein coding RNA 475 [Source:HGNC Symbol;Acc:HGNC:23569]           |
| <i>NEO1</i>           | 15 | q24.1  | 2.03 | 0.00631 | neogenin 1 [Source:HGNC Symbol;Acc:HGNC:7754]                                            |
| <i>ALPK3</i>          | 15 | q25.3  | 2.01 | 0.00002 | alpha-kinase 3 [Source:HGNC Symbol;Acc:HGNC:17574]                                       |
| <i>RP11-757G1.6</i>   | 11 | q13.3  | 2.00 | 0       |                                                                                          |
| <i>DNAAF3</i>         | 19 | q13.42 | 1.99 | 0.00755 | dynein, axonemal, assembly factor 3 [Source:HGNC Symbol;Acc:HGNC:30492]                  |
| <i>SPIN3</i>          | X  | p11.21 | 1.98 | 0.00333 | spindlin family, member 3 [Source:HGNC Symbol;Acc:HGNC:27272]                            |
| <i>CCNB3</i>          | X  | p11.22 | 1.97 | 0.00278 | cyclin B3 [Source:HGNC Symbol;Acc:HGNC:18709]                                            |
| <i>DUSP15</i>         | 20 | q11.21 | 1.96 | 0.00077 | dual specificity phosphatase 15 [Source:HGNC Symbol;Acc:HGNC:16236]                      |
| <i>SYT17</i>          | 16 | p12.3  | 1.92 | 0.00008 | synaptotagmin XVII [Source:HGNC Symbol;Acc:HGNC:24119]                                   |
| <i>RP11-497G19.1</i>  | 12 | q24.22 | 1.92 | 0.00363 |                                                                                          |
| <i>C19orf84</i>       | 19 | q13.41 | 1.91 | 0.00027 | chromosome 19 open reading frame 84 [Source:HGNC Symbol;Acc:HGNC:27112]                  |
| <i>MIR17HG</i>        | 13 | q31.3  | 1.90 | 0       | miR-17-92 cluster host gene (non-protein coding) [Source:HGNC Symbol;Acc:HGNC:23564]     |
| <i>GAS1</i>           | 9  | q21.33 | 1.87 | 0.00079 | growth arrest-specific 1 [Source:HGNC Symbol;Acc:HGNC:4165]                              |
| <i>NMUR1</i>          | 2  | q37.1  | 1.87 | 0.00086 | neuromedin U receptor 1 [Source:HGNC Symbol;Acc:HGNC:4518]                               |
| <i>GOLGA8O</i>        | 15 | q13.3  | 1.86 | 0       | golgin A8 family, member O [Source:HGNC Symbol;Acc:HGNC:44406]                           |
| <i>CYP2E1</i>         | 10 | q26.3  | 1.86 | 0.00479 | cytochrome P450, family 2, subfamily E, polypeptide 1 [Source:HGNC Symbol;Acc:HGNC:2631] |
| <i>RP11-465B22.8</i>  | 1  | p36.33 | 1.86 | 0.00517 |                                                                                          |
| <i>LINC00899</i>      | 22 | q13.31 | 1.80 | 0.00001 | long intergenic non-protein coding RNA 899 [Source:HGNC Symbol;Acc:HGNC:48583]           |
| <i>AC027601.1</i>     | 17 | q25.3  | 1.79 | 0.00883 |                                                                                          |
| <i>ARHGAP32</i>       | 11 | q24.3  | 1.78 | 0.00356 | Rho GTPase activating protein 32 [Source:HGNC Symbol;Acc:HGNC:17399]                     |
| <i>EPHX2</i>          | 8  | p21.2  | 1.75 | 0.00042 | epoxide hydrolase 2, cytoplasmic [Source:HGNC Symbol;Acc:HGNC:3402]                      |

|                      |    |        |      |         |                                                                                                          |
|----------------------|----|--------|------|---------|----------------------------------------------------------------------------------------------------------|
| <i>PSD</i>           | 10 | q24.32 | 1.75 | 0.00198 | pleckstrin and Sec7 domain containing [Source:HGNC Symbol;Acc:HGNC:9507]                                 |
| <i>GRAMD3</i>        | 5  | q23.2  | 1.74 | 0.00011 | GRAM domain containing 3 [Source:HGNC Symbol;Acc:HGNC:24911]                                             |
| <i>GRHL1</i>         | 2  | p25.1  | 1.73 | 0.00042 | grainyhead-like 1 (Drosophila) [Source:HGNC Symbol;Acc:HGNC:17923]                                       |
| <i>RP11-566K19.6</i> | 15 | q11.2  | 1.72 | 0       |                                                                                                          |
| <i>MMP14</i>         | 14 | q11.2  | 1.71 | 0.00008 | matrix metalloproteinase 14 (membrane-inserted) [Source:HGNC Symbol;Acc:HGNC:7160]                       |
| <i>RP11-338N10.3</i> | 1  | p36.23 | 1.71 | 0.00844 |                                                                                                          |
| <i>CAMKV</i>         | 3  | p21.31 | 1.69 | 0.00045 | CaM kinase-like vesicle-associated [Source:HGNC Symbol;Acc:HGNC:28788]                                   |
| <i>PTPRF</i>         | 1  | p34.2  | 1.69 | 0.00377 | protein tyrosine phosphatase, receptor type, F [Source:HGNC Symbol;Acc:HGNC:9670]                        |
| <i>DBH-AS1</i>       | 9  | q34.2  | 1.66 | 0.00001 | DBH antisense RNA 1 [Source:HGNC Symbol;Acc:HGNC:24155]                                                  |
| <i>DOCK6</i>         | 19 | p13.2  | 1.66 | 0.00309 | dedicator of cytokinesis 6 [Source:HGNC Symbol;Acc:HGNC:19189]                                           |
| <i>RP11-47L3.1</i>   | 17 | q12    | 1.66 | 0.00718 |                                                                                                          |
| <i>CTD-2035E11.4</i> | 5  | p12    | 1.65 | 0.00452 |                                                                                                          |
| <i>RP11-146D12.2</i> | 9  | p11.2  | 1.65 | 0.00715 |                                                                                                          |
| <i>LPAR5</i>         | 12 | p13.31 | 1.64 | 0.00002 | lysophosphatidic acid receptor 5 [Source:HGNC Symbol;Acc:HGNC:13307]                                     |
| <i>SLC2A10</i>       | 20 | q13.12 | 1.62 | 0.00092 | solute carrier family 2 (facilitated glucose transporter), member 10 [Source:HGNC Symbol;Acc:HGNC:13444] |
| <i>HECTD2</i>        | 10 | q23.32 | 1.59 | 0       | HECT domain containing E3 ubiquitin protein ligase 2 [Source:HGNC Symbol;Acc:HGNC:26736]                 |
| <i>RP11-159N11.4</i> | 11 | q23.2  | 1.59 | 0.00623 |                                                                                                          |
| <i>MRC2</i>          | 17 | q23.2  | 1.58 | 0.00787 | mannose receptor, C type 2 [Source:HGNC Symbol;Acc:HGNC:16875]                                           |
| <i>CDC14B</i>        | 9  | q22.33 | 1.57 | 0       | cell division cycle 14B [Source:HGNC Symbol;Acc:HGNC:1719]                                               |
| <i>SLC2A14</i>       | 12 | p13.31 | 1.57 | 0.00012 | solute carrier family 2 (facilitated glucose transporter), member 14 [Source:HGNC Symbol;Acc:HGNC:18301] |
| <i>FAM83H</i>        | 8  | q24.3  | 1.56 | 0.00123 | family with sequence similarity 83, member H [Source:HGNC Symbol;Acc:HGNC:24797]                         |
| <i>ZFYVE9</i>        | 1  | p32.3  | 1.56 | 0.0062  | zinc finger, FYVE domain containing 9 [Source:HGNC Symbol;Acc:HGNC:6775]                                 |
| <i>PNMA3</i>         | X  | q28    | 1.55 | 0.00019 | paraneoplastic Ma antigen 3 [Source:HGNC Symbol;Acc:HGNC:18742]                                          |
| <i>ADAMTS10</i>      | 19 | p13.2  | 1.55 | 0.00038 | ADAM metalloproteinase with thrombospondin type 1 motif, 10 [Source:HGNC Symbol;Acc:HGNC:13201]          |
| <i>SERHL</i>         | 22 | q13.2  | 1.54 | 0.00019 | serine hydrolase-like (pseudogene) [Source:HGNC Symbol;Acc:HGNC:14408]                                   |
| <i>FAM169A</i>       | 5  | q13.3  | 1.54 | 0.00407 | family with sequence similarity 169, member A [Source:HGNC Symbol;Acc:HGNC:29138]                        |
| <i>OBSCN</i>         | 1  | q42.13 | 1.53 | 0.00076 | obscurin, cytoskeletal calmodulin and titin-interacting RhoGEF [Source:HGNC Symbol;Acc:HGNC:15719]       |
| <i>RP11-578F21.6</i> | 15 | q13.1  | 1.52 | 0.00825 |                                                                                                          |

|                        |    |        |      |         |                                                                                                   |
|------------------------|----|--------|------|---------|---------------------------------------------------------------------------------------------------|
| <i>GSTM3</i>           | 1  | p13.3  | 1.51 | 0.001   | glutathione S-transferase mu 3 (brain) [Source:HGNC Symbol;Acc:HGNC:4635]                         |
| <i>PHLDA3</i>          | 1  | q32.1  | 1.50 | 0.00004 | pleckstrin homology-like domain, family A, member 3 [Source:HGNC Symbol;Acc:HGNC:8934]            |
| <i>KRT8</i>            | 12 | q13.13 | 1.49 | 0.00002 | keratin 8 [Source:HGNC Symbol;Acc:HGNC:6446]                                                      |
| <i>RP4-695O20_B.10</i> | 22 | q13.31 | 1.47 | 0       |                                                                                                   |
| <i>SOCS2-AS1</i>       | 12 | q22    | 1.47 | 0.00424 | SOCS2 antisense RNA 1 [Source:HGNC Symbol;Acc:HGNC:27054]                                         |
| <i>CLCNKA</i>          | 1  | p36.13 | 1.45 | 0.0057  | chloride channel, voltage-sensitive Ka [Source:HGNC Symbol;Acc:HGNC:2026]                         |
| <i>SNPH</i>            | 20 | p13    | 1.44 | 0.00011 | syntrophin [Source:HGNC Symbol;Acc:HGNC:15931]                                                    |
| <i>PRDM5</i>           | 4  | q27    | 1.43 | 0.00666 | PR domain containing 5 [Source:HGNC Symbol;Acc:HGNC:9349]                                         |
| <i>C15orf38</i>        | 15 | q26.1  | 1.42 | 0.00005 |                                                                                                   |
| <i>CCND2</i>           | 12 | p13.32 | 1.42 | 0.00029 | cyclin D2 [Source:HGNC Symbol;Acc:HGNC:1583]                                                      |
| <i>CHPF</i>            | 2  | q35    | 1.40 | 0.0006  | chondroitin polymerizing factor [Source:HGNC Symbol;Acc:HGNC:24291]                               |
| <i>AC004381.7</i>      | 7  | p15.2  | 1.40 | 0.00462 |                                                                                                   |
| <i>SARDH</i>           | 9  | q34.2  | 1.39 | 0.00007 | sarcosine dehydrogenase [Source:HGNC Symbol;Acc:HGNC:10536]                                       |
| <i>LPHN1</i>           | 19 | p13.12 | 1.39 | 0.0001  | latrophilin 1 [Source:HGNC Symbol;Acc:HGNC:20973]                                                 |
| <i>SATB1-AS1</i>       | 3  | p24.3  | 1.39 | 0.00051 | SATB1 antisense RNA 1 [Source:HGNC Symbol;Acc:HGNC:50687]                                         |
| <i>FZD3</i>            | 8  | p21.1  | 1.39 | 0.00797 | frizzled class receptor 3 [Source:HGNC Symbol;Acc:HGNC:4041]                                      |
| <i>MYEF2</i>           | 15 | q21.1  | 1.39 | 0.00986 | myelin expression factor 2 [Source:HGNC Symbol;Acc:HGNC:17940]                                    |
| <i>LGR4</i>            | 11 | p14.1  | 1.38 | 0.00254 | leucine-rich repeat containing G protein-coupled receptor 4 [Source:HGNC Symbol;Acc:HGNC:13299]   |
| <i>GALM</i>            | 2  | p22.1  | 1.38 | 0.00419 | galactose mutarotase (aldose 1-epimerase) [Source:HGNC Symbol;Acc:HGNC:24063]                     |
| <i>CCDC155</i>         | 19 | q13.33 | 1.37 | 0.00228 | coiled-coil domain containing 155 [Source:HGNC Symbol;Acc:HGNC:26520]                             |
| <i>RP11-803P9.1</i>    | 3  | q29    | 1.37 | 0.00825 |                                                                                                   |
| <i>U91328.22</i>       | 6  | p22.2  | 1.35 | 0.00796 |                                                                                                   |
| <i>RP11-44N21.1</i>    | 14 | q32.33 | 1.34 | 0.00106 |                                                                                                   |
| <i>TPM2</i>            | 9  | p13.3  | 1.33 | 0       | tropomyosin 2 (beta) [Source:HGNC Symbol;Acc:HGNC:12011]                                          |
| <i>MEIS1</i>           | 2  | p14    | 1.32 | 0       | Meis homeobox 1 [Source:HGNC Symbol;Acc:HGNC:7000]                                                |
| <i>FCHO2</i>           | 5  | q13.2  | 1.32 | 0.00007 | FCH domain only 2 [Source:HGNC Symbol;Acc:HGNC:25180]                                             |
| <i>MMP15</i>           | 16 | q21    | 1.32 | 0.00062 | matrix metalloproteinase 15 (membrane-inserted) [Source:HGNC Symbol;Acc:HGNC:7161]                |
| <i>PACSL1</i>          | 11 | p11.2  | 1.31 | 0.00049 | protein kinase C and casein kinase substrate in neurons 3 [Source:HGNC Symbol;Acc:HGNC:8572]      |
| <i>CACNA1A</i>         | 19 | p13.13 | 1.31 | 0.00178 | calcium channel, voltage-dependent, P/Q type, alpha 1A subunit [Source:HGNC Symbol;Acc:HGNC:1388] |



|                      |    |        |      |         |                                                                                                                                              |
|----------------------|----|--------|------|---------|----------------------------------------------------------------------------------------------------------------------------------------------|
| <i>TTC12</i>         | 11 | q23.2  | 1.31 | 0.00242 | tetratricopeptide repeat domain 12 [Source:HGNC Symbol;Acc:HGNC:23700]                                                                       |
| <i>HSPG2</i>         | 1  | p36.12 | 1.31 | 0.00312 | heparan sulfate proteoglycan 2 [Source:HGNC Symbol;Acc:HGNC:5273]                                                                            |
| <i>FKBP14</i>        | 7  | p14.3  | 1.31 | 0.00796 | FK506 binding protein 14, 22 kDa [Source:HGNC Symbol;Acc:HGNC:18625]                                                                         |
| <i>SENP6</i>         | 6  | q14.1  | 1.30 | 0       | SUMO1/sentrin specific peptidase 6 [Source:HGNC Symbol;Acc:HGNC:20944]                                                                       |
| <i>MTX3</i>          | 5  | q14.1  | 1.30 | 0.00007 | metaxin 3 [Source:HGNC Symbol;Acc:HGNC:24812]                                                                                                |
| <i>AC009495.3</i>    | 2  | q24.2  | 1.29 | 0.00898 |                                                                                                                                              |
| <i>PPFIA3</i>        | 19 | q13.33 | 1.28 | 0       | protein tyrosine phosphatase, receptor type, f polypeptide (PTPRF), interacting protein (liprin), alpha 3 [Source:HGNC Symbol;Acc:HGNC:9247] |
| <i>C14orf79</i>      | 14 | q32.33 | 1.28 | 0.00012 | chromosome 14 open reading frame 79 [Source:HGNC Symbol;Acc:HGNC:20126]                                                                      |
| <i>PON2</i>          | 7  | q21.3  | 1.28 | 0.00619 | paraoxonase 2 [Source:HGNC Symbol;Acc:HGNC:9205]                                                                                             |
| <i>RANBP17</i>       | 5  | q35.1  | 1.28 | 0.00811 | RAN binding protein 17 [Source:HGNC Symbol;Acc:HGNC:14428]                                                                                   |
| <i>RP11-353N4.5</i>  | 1  | q21.2  | 1.28 | 0.00898 |                                                                                                                                              |
| <i>CABP4</i>         | 11 | q13.2  | 1.27 | 0.00027 | calcium binding protein 4 [Source:HGNC Symbol;Acc:HGNC:1386]                                                                                 |
| <i>RP11-329B9.4</i>  | 3  | q27.1  | 1.27 | 0.00185 |                                                                                                                                              |
| <i>AC007392.3</i>    | 7  | q21.2  | 1.26 | 0.00015 |                                                                                                                                              |
| <i>H1FO</i>          | 22 | q13.1  | 1.26 | 0.0039  | H1 histone family, member 0 [Source:HGNC Symbol;Acc:HGNC:4714]                                                                               |
| <i>LINC00477</i>     | 12 | p12.1  | 1.26 | 0.00421 | long intergenic non-protein coding RNA 477 [Source:HGNC Symbol;Acc:HGNC:26557]                                                               |
| <i>HESX1</i>         | 3  | p14.3  | 1.26 | 0.00579 | HESX homeobox 1 [Source:HGNC Symbol;Acc:HGNC:4877]                                                                                           |
| <i>TTC28</i>         | 22 | q12.1  | 1.25 | 0       | tetratricopeptide repeat domain 28 [Source:HGNC Symbol;Acc:HGNC:29179]                                                                       |
| <i>TMEM136</i>       | 11 | q23.3  | 1.25 | 0.00017 | transmembrane protein 136 [Source:HGNC Symbol;Acc:HGNC:28280]                                                                                |
| <i>ETV5</i>          | 3  | q27.2  | 1.25 | 0.00421 | ets variant 5 [Source:HGNC Symbol;Acc:HGNC:3494]                                                                                             |
| <i>LTC4S</i>         | 15 | q15.1  | 1.25 | 0.00815 | leukocyte receptor tyrosine kinase [Source:HGNC Symbol;Acc:HGNC:6721]                                                                        |
| <i>RP11-1000B6.3</i> | 15 | q13.3  | 1.24 | 0       |                                                                                                                                              |
| <i>FZD7</i>          | 2  | q33.1  | 1.24 | 0.00035 | frizzled class receptor 7 [Source:HGNC Symbol;Acc:HGNC:4045]                                                                                 |
| <i>CCDC40</i>        | 17 | q25.3  | 1.23 | 0       | coiled-coil domain containing 40 [Source:HGNC Symbol;Acc:HGNC:26090]                                                                         |
| <i>ZNF334</i>        | 20 | q13.12 | 1.23 | 0.00617 | zinc finger protein 334 [Source:HGNC Symbol;Acc:HGNC:15806]                                                                                  |
| <i>ACRBP</i>         | 12 | p13.31 | 1.22 | 0.00066 | acrosin binding protein [Source:HGNC Symbol;Acc:HGNC:17195]                                                                                  |
| <i>ZNF853</i>        | 7  | p22.1  | 1.22 | 0.00075 | zinc finger protein 853 [Source:HGNC Symbol;Acc:HGNC:21767]                                                                                  |
| <i>KLHL3</i>         | 5  | q31.2  | 1.21 | 0       | kelch-like family member 3 [Source:HGNC Symbol;Acc:HGNC:6354]                                                                                |
| <i>GOLGA8F</i>       | 15 | q13.1  | 1.20 | 0       | golgin A8 family, member F [Source:HGNC Symbol;Acc:HGNC:32378]                                                                               |

|                      |    |        |      |         |                                                                                               |
|----------------------|----|--------|------|---------|-----------------------------------------------------------------------------------------------|
| <i>NIPA1</i>         | 15 | q11.2  | 1.20 | 0       | non imprinted in Prader-Willi/Angelman syndrome 1 [Source:HGNC Symbol;Acc:HGNC:17043]         |
| <i>WWC1</i>          | 5  | q34    | 1.20 | 0.00179 | WW and C2 domain containing 1 [Source:HGNC Symbol;Acc:HGNC:29435]                             |
| <i>SGK2</i>          | 20 | q13.12 | 1.20 | 0.00822 | serum/glucocorticoid regulated kinase 2 [Source:HGNC Symbol;Acc:HGNC:13900]                   |
| <i>MEF2C-AS1</i>     | 5  | q14.3  | 1.19 | 0.00066 | MEF2C antisense RNA 1 [Source:HGNC Symbol;Acc:HGNC:48908]                                     |
| <i>RP1-32B1.4</i>    | 6  | q23.3  | 1.19 | 0.00798 |                                                                                               |
| <i>EFEMP2</i>        | 11 | q13.1  | 1.19 | 0.00998 | EGF containing fibulin-like extracellular matrix protein 2 [Source:HGNC Symbol;Acc:HGNC:3219] |
| <i>NRSN2</i>         | 20 | p13    | 1.18 | 0.00311 | neurensin 2 [Source:HGNC Symbol;Acc:HGNC:16229]                                               |
| <i>RPS6KL1</i>       | 14 | q24.3  | 1.16 | 0.0077  | ribosomal protein S6 kinase-like 1 [Source:HGNC Symbol;Acc:HGNC:20222]                        |
| <i>PRR34</i>         | 22 | q13.31 | 1.15 | 0.00008 | proline rich 34 [Source:HGNC Symbol;Acc:HGNC:25606]                                           |
| <i>PPAN-P2RY11</i>   | 19 | p13.2  | 1.15 | 0.00773 | PPAN-P2RY11 readthrough [Source:HGNC Symbol;Acc:HGNC:33526]                                   |
| <i>GOLGA6A</i>       | 15 | q24.1  | 1.14 | 0.0007  | golgin A6 family, member A [Source:HGNC Symbol;Acc:HGNC:13567]                                |
| <i>CTC-510F12.2</i>  | 19 | p13.2  | 1.13 | 0.00029 |                                                                                               |
| <i>TMPRSS9</i>       | 19 | p13.3  | 1.13 | 0.00064 | transmembrane protease, serine 9 [Source:HGNC Symbol;Acc:HGNC:30079]                          |
| <i>CIB2</i>          | 15 | q25.1  | 1.12 | 0.00006 | calcium and integrin binding family member 2 [Source:HGNC Symbol;Acc:HGNC:24579]              |
| <i>ACO26150.8</i>    | 15 | q13.2  | 1.11 | 0.0096  |                                                                                               |
| <i>RHPN1-AS1</i>     | 8  | q24.3  | 1.10 | 0.00008 | RHPN1 antisense RNA 1 (head to head) [Source:HGNC Symbol;Acc:HGNC:28457]                      |
| <i>TBX1</i>          | 22 | q11.21 | 1.10 | 0.00255 | T-box 1 [Source:HGNC Symbol;Acc:HGNC:11592]                                                   |
| <i>REEP6</i>         | 19 | p13.3  | 1.09 | 0.00027 | receptor accessory protein 6 [Source:HGNC Symbol;Acc:HGNC:30078]                              |
| <i>PAOX</i>          | 10 | q26.3  | 1.07 | 0.00041 | polyamine oxidase (exo-N4-amino) [Source:HGNC Symbol;Acc:HGNC:20837]                          |
| <i>GOLGA8H</i>       | 15 | q13.2  | 1.07 | 0.00242 | golgin A8 family, member H [Source:HGNC Symbol;Acc:HGNC:37443]                                |
| <i>CTD-3092A11.2</i> | 15 | q13.2  | 1.06 | 0.00001 |                                                                                               |
| <i>ZBTB38</i>        | 3  | q23    | 1.06 | 0.00042 | zinc finger and BTB domain containing 38 [Source:HGNC Symbol;Acc:HGNC:26636]                  |
| <i>PCSK4</i>         | 19 | p13.3  | 1.06 | 0.00346 | proprotein convertase subtilisin/kexin type 4 [Source:HGNC Symbol;Acc:HGNC:8746]              |
| <i>MEF2C</i>         | 5  | q14.3  | 1.06 | 0.00374 | myocyte enhancer factor 2C [Source:HGNC Symbol;Acc:HGNC:6996]                                 |
| <i>GOLGA8N</i>       | 15 | q13.3  | 1.05 | 0       | golgin A8 family, member N [Source:HGNC Symbol;Acc:HGNC:44405]                                |
| <i>AL133493.2</i>    | 21 | q22.3  | 1.05 | 0.00017 |                                                                                               |
| <i>RUNDC3A</i>       | 17 | q21.31 | 1.05 | 0.0031  | RUN domain containing 3A [Source:HGNC Symbol;Acc:HGNC:16984]                                  |
| <i>SATB1</i>         | 3  | p24.3  | 1.05 | 0.00336 | SATB homeobox 1 [Source:HGNC Symbol;Acc:HGNC:10541]                                           |
| <i>RGAG4</i>         | X  | q13.1  | 1.05 | 0.00983 | retrotransposon gag domain containing 4 [Source:HGNC Symbol;Acc:HGNC:29430]                   |
| <i>PHLDB1</i>        | 11 | q23.3  | 1.04 | 0.00005 | pleckstrin homology-like domain, family B, member 1 [Source:HGNC Symbol;Acc:HGNC:23697]       |

|                      |    |                  |      |         |                                                                                                |
|----------------------|----|------------------|------|---------|------------------------------------------------------------------------------------------------|
| <i>AC016757.3</i>    | 2  | q13              | 1.04 | 0.00185 |                                                                                                |
| <i>ZFP82</i>         | 19 | q13.12           | 1.03 | 0.00001 | ZFP82 zinc finger protein [Source:HGNC Symbol;Acc:HGNC:28682]                                  |
| <i>RP11-588H23.3</i> | 12 | q15              | 1.03 | 0.00452 |                                                                                                |
| <i>GOLGA6L19</i>     | 15 | q25.2            | 1.02 | 0       |                                                                                                |
| <i>NKD1</i>          | 16 | q12.1            | 1.02 | 0.00013 | naked cuticle homolog 1 (Drosophila) [Source:HGNC Symbol;Acc:HGNC:17045]                       |
| <i>ECHDC2</i>        | 1  | p32.3            | 1.02 | 0.0006  | enoyl CoA hydratase domain containing 2 [Source:HGNC Symbol;Acc:HGNC:23408]                    |
| <i>MOK</i>           | 14 | q32.31           | 1.02 | 0.00495 | MOK protein kinase [Source:HGNC Symbol;Acc:HGNC:9833]                                          |
| <i>RHBDF1</i>        | 16 | p13.3            | 1.01 | 0.00192 | rhomboid 5 homolog 1 (Drosophila) [Source:HGNC Symbol;Acc:HGNC:20561]                          |
| <i>RP11-89K11.1</i>  | 15 | q26.3            | 1.01 | 0.0048  |                                                                                                |
| <i>GOLGA8R</i>       | 15 | q13.2            | 1.00 | 0.00622 | golgin A8 family, member R [Source:HGNC Symbol;Acc:HGNC:44407]                                 |
| <i>PLTP</i>          | 20 | q13.12           | 1.00 | 0.00636 | phospholipid transfer protein [Source:HGNC Symbol;Acc:HGNC:9093]                               |
| <i>FAM95B1</i>       | 9  | q21.11,<br>p11.2 | 0.99 | 0.00014 | family with sequence similarity 95, member B1 [Source:EntrezGene;Acc:100133036]                |
| <i>CTF1</i>          | 16 | p11.2            | 0.98 | 0.00002 | cardiotrophin 1 [Source:HGNC Symbol;Acc:HGNC:2499]                                             |
| <i>CAND2</i>         | 3  | p25.2            | 0.98 | 0.00779 | cullin-associated and neddylation-dissociated 2 (putative) [Source:HGNC Symbol;Acc:HGNC:30689] |
| <i>RP11-242F4.2</i>  | 8  | p22              | 0.98 | 0.00796 |                                                                                                |
| <i>PTGR1</i>         | 9  | q31.3            | 0.97 | 0.00847 | prostaglandin reductase 1 [Source:HGNC Symbol;Acc:HGNC:18429]                                  |
| <i>RP5-884M6.1</i>   | 7  | q22.3            | 0.97 | 0.00987 |                                                                                                |
| <i>C19orf57</i>      | 19 | p13.12           | 0.96 | 0.00036 | chromosome 19 open reading frame 57 [Source:HGNC Symbol;Acc:HGNC:28153]                        |
| <i>FGFR4</i>         | 5  | q35.2            | 0.95 | 0.00045 | fibroblast growth factor receptor 4 [Source:HGNC Symbol;Acc:HGNC:3691]                         |
| <i>NUMBL</i>         | 19 | q13.2            | 0.93 | 0       | numb homolog (Drosophila)-like [Source:HGNC Symbol;Acc:HGNC:8061]                              |
| <i>FAM213A</i>       | 10 | q23.1            | 0.93 | 0.00017 | family with sequence similarity 213, member A [Source:HGNC Symbol;Acc:HGNC:28651]              |
| <i>MYB</i>           | 6  | q23.3            | 0.92 | 0       | v-myb avian myeloblastosis viral oncogene homolog [Source:HGNC Symbol;Acc:HGNC:7545]           |
| <i>TARBP1</i>        | 1  | q42.2            | 0.92 | 0.00004 | TAR (HIV-1) RNA binding protein 1 [Source:HGNC Symbol;Acc:HGNC:11568]                          |
| <i>CCDC62</i>        | 12 | q24.31           | 0.92 | 0.00437 | coiled-coil domain containing 62 [Source:HGNC Symbol;Acc:HGNC:30723]                           |
| <i>DFNB59</i>        | 2  | q31.2            | 0.92 | 0.00655 | deafness, autosomal recessive 59 [Source:HGNC Symbol;Acc:HGNC:29502]                           |
| <i>TXK</i>           | 4  | p12              | 0.91 | 0.00077 | TXK tyrosine kinase [Source:HGNC Symbol;Acc:HGNC:12434]                                        |
| <i>NMB</i>           | 15 | q25.2            | 0.90 | 0.00113 | neuromedin B [Source:HGNC Symbol;Acc:HGNC:7842]                                                |
| <i>PCP2</i>          | 19 | p13.2            | 0.90 | 0.00221 | Purkinje cell protein 2 [Source:HGNC Symbol;Acc:HGNC:30209]                                    |
| <i>NUTM2D</i>        | 10 | q23.2            | 0.90 | 0.00411 | NUT family member 2D [Source:HGNC Symbol;Acc:HGNC:23447]                                       |

|                      |    |        |      |         |                                                                                                                     |
|----------------------|----|--------|------|---------|---------------------------------------------------------------------------------------------------------------------|
| <i>ARL2</i>          | 11 | q13.1  | 0.90 | 0.00481 | ADP-ribosylation factor-like 2 [Source:HGNC Symbol;Acc:HGNC:693]                                                    |
| <i>PLEKHA7</i>       | 11 | p15.1  | 0.89 | 0.00883 | pleckstrin homology domain containing, family A member 7 [Source:HGNC Symbol;Acc:HGNC:27049]                        |
| <i>CACNA1F</i>       | X  | p11.23 | 0.88 | 0.00017 | calcium channel, voltage-dependent, L type, alpha 1F subunit [Source:HGNC Symbol;Acc:HGNC:1393]                     |
| <i>TMEM102</i>       | 17 | p13.1  | 0.88 | 0.00188 | transmembrane protein 102 [Source:HGNC Symbol;Acc:HGNC:26722]                                                       |
| <i>LINC00863</i>     | 10 | q23.2  | 0.87 | 0.00042 | long intergenic non-protein coding RNA 863 [Source:HGNC Symbol;Acc:HGNC:45162]                                      |
| <i>RP11-308K2.1</i>  | 4  | q35.2  | 0.85 | 0.00001 |                                                                                                                     |
| <i>ADSSL1</i>        | 14 | q32.33 | 0.85 | 0.00493 | adenylosuccinate synthase like 1 [Source:HGNC Symbol;Acc:HGNC:20093]                                                |
| <i>TEC</i>           | 4  | p11    | 0.84 | 0.00102 | tec protein tyrosine kinase [Source:HGNC Symbol;Acc:HGNC:11719]                                                     |
| <i>GPC1</i>          | 2  | q37.3  | 0.84 | 0.00796 | glypican 1 [Source:HGNC Symbol;Acc:HGNC:4449]                                                                       |
| <i>CDNF</i>          | 10 | p13    | 0.83 | 0.00237 | cerebral dopamine neurotrophic factor [Source:HGNC Symbol;Acc:HGNC:24913]                                           |
| <i>RP11-1136G4.2</i> | 16 | q12.2  | 0.82 | 0.00079 |                                                                                                                     |
| <i>WDR35</i>         | 2  | p24.1  | 0.81 | 0.00098 | WD repeat domain 35 [Source:HGNC Symbol;Acc:HGNC:29250]                                                             |
| <i>RP11-320M2.1</i>  | 2  | p25.1  | 0.81 | 0.0022  |                                                                                                                     |
| <i>MBNL1-AS1</i>     | 3  | q25.1  | 0.81 | 0.0027  | MBNL1 antisense RNA 1 [Source:HGNC Symbol;Acc:HGNC:44584]                                                           |
| <i>CDK6</i>          | 7  | q21.2  | 0.81 | 0.00886 | cyclin-dependent kinase 6 [Source:HGNC Symbol;Acc:HGNC:1777]                                                        |
| <i>DEXI</i>          | 16 | p13.13 | 0.79 | 0.0001  | Dexi homolog (mouse) [Source:HGNC Symbol;Acc:HGNC:13267]                                                            |
| <i>KCNMB3</i>        | 3  | q26.32 | 0.79 | 0.00576 | potassium large conductance calcium-activated channel, subfamily M beta member 3 [Source:HGNC Symbol;Acc:HGNC:6287] |
| <i>HSPA2</i>         | 14 | q23.3  | 0.78 | 0.00055 | heat shock 70kDa protein 2 [Source:HGNC Symbol;Acc:HGNC:5235]                                                       |
| <i>RP5-1159O4.1</i>  | 7  | p21.3  | 0.78 | 0.00062 |                                                                                                                     |
| <i>TNPO1</i>         | 5  | q13.2  | 0.77 | 0.00001 | transportin 1 [Source:HGNC Symbol;Acc:HGNC:6401]                                                                    |
| <i>RP1-155G6.4</i>   | 20 | q13.13 | 0.77 | 0.00029 |                                                                                                                     |
| <i>LINC00997</i>     | 7  | p14.3  | 0.77 | 0.00309 | long intergenic non-protein coding RNA 997 [Source:HGNC Symbol;Acc:HGNC:48952]                                      |
| <i>LINC00526</i>     | 18 | p11.31 | 0.76 | 0.00745 | long intergenic non-protein coding RNA 526 [Source:HGNC Symbol;Acc:HGNC:28278]                                      |
| <i>CCDC120</i>       | X  | p11.23 | 0.75 | 0.00002 | coiled-coil domain containing 120 [Source:HGNC Symbol;Acc:HGNC:28910]                                               |
| <i>MAGED2</i>        | X  | p11.21 | 0.75 | 0.0008  | melanoma antigen family H, 1 [Source:HGNC Symbol;Acc:HGNC:24092]                                                    |
| <i>RNF220</i>        | 1  | p34.1  | 0.74 | 0       | ring finger protein 220 [Source:HGNC Symbol;Acc:HGNC:25552]                                                         |
| <i>C11orf95</i>      | 11 | q13.1  | 0.74 | 0.0004  | chromosome 11 open reading frame 95 [Source:HGNC Symbol;Acc:HGNC:28449]                                             |
| <i>CTD-2366F13.1</i> | 5  | q11.2  | 0.73 | 0.00797 |                                                                                                                     |
| <i>ARMCX4</i>        | X  | q22.1  | 0.73 | 0.00856 | armadillo repeat containing, X-linked 4 [Source:HGNC Symbol;Acc:HGNC:28615]                                         |

|                         |    |        |      |         |                                                                                                      |
|-------------------------|----|--------|------|---------|------------------------------------------------------------------------------------------------------|
| <i>AC007566.10</i>      | 19 | q13.42 | 0.70 | 0.00156 |                                                                                                      |
| <i>KIAA1161</i>         | 9  | p13.3  | 0.70 | 0.00563 | KIAA1161 [Source:HGNC Symbol;Acc:HGNC:19918]                                                         |
| <i>ZNF768</i>           | 16 | p11.2  | 0.70 | 0.00832 | zinc finger protein 768 [Source:HGNC Symbol;Acc:HGNC:26273]                                          |
| <i>MYO15A</i>           | 17 | p11.2  | 0.69 | 0.00025 | myosin XVA [Source:HGNC Symbol;Acc:HGNC:7594]                                                        |
| <i>CHRNBA</i>           | 15 | q25.1  | 0.69 | 0.00093 | cholinergic receptor, nicotinic, beta 4 (neuronal) [Source:HGNC Symbol;Acc:HGNC:1964]                |
| <i>CTD-2630F21.1</i>    | 19 | q13.12 | 0.68 | 0.00001 |                                                                                                      |
| <i>RP11-166D19.1</i>    | 11 | q24.1  | 0.67 | 0.00145 |                                                                                                      |
| <i>DECR2</i>            | 16 | p13.3  | 0.67 | 0.00155 | 2,4-dienoyl CoA reductase 2, peroxisomal [Source:HGNC Symbol;Acc:HGNC:2754]                          |
| <i>TARSL2</i>           | 15 | q26.3  | 0.67 | 0.00443 | threonyl-tRNA synthetase-like 2 [Source:HGNC Symbol;Acc:HGNC:24728]                                  |
| <i>RP3-327A19.5</i>     | X  | q24    | 0.67 | 0.00603 |                                                                                                      |
| <i>SPIN1</i>            | 9  | q22.1  | 0.66 | 0.00103 | spindlin 1 [Source:HGNC Symbol;Acc:HGNC:11243]                                                       |
| <i>GATSL2</i>           | 7  | q11.23 | 0.66 | 0.00165 | GATS protein-like 2 [Source:HGNC Symbol;Acc:HGNC:37073]                                              |
| <i>ZNF582</i>           | 19 | q13.43 | 0.66 | 0.00278 | zinc finger protein 582 [Source:HGNC Symbol;Acc:HGNC:26421]                                          |
| <i>TVP23C</i>           | 17 | p12    | 0.66 | 0.00918 | trans-golgi network vesicle protein 23 homolog C (S. cerevisiae) [Source:HGNC Symbol;Acc:HGNC:30453] |
| <i>WDR6</i>             | 3  | p21.31 | 0.65 | 0       | WD repeat domain 6 [Source:HGNC Symbol;Acc:HGNC:12758]                                               |
| <i>RP11-95P2.1</i>      | 16 | p13.3  | 0.65 | 0.00082 |                                                                                                      |
| <i>FGF11</i>            | 17 | p13.1  | 0.65 | 0.00343 | fibroblast growth factor 11 [Source:HGNC Symbol;Acc:HGNC:3667]                                       |
| <i>RP1-179N16.6</i>     | 6  | p21.31 | 0.64 | 0.00815 |                                                                                                      |
| <i>BMP1</i>             | 8  | p21.3  | 0.63 | 0.00183 | bone morphogenetic protein 1 [Source:HGNC Symbol;Acc:HGNC:1067]                                      |
| <i>XXbac-BPG308K3.6</i> | 6  | p22.1  | 0.60 | 0.00604 |                                                                                                      |
| <i>BBS5</i>             | 2  | q31.1  | 0.59 | 0.00125 | Bardet-Biedl syndrome 5 [Source:HGNC Symbol;Acc:HGNC:970]                                            |
| <i>ZNF569</i>           | 19 | q13.12 | 0.57 | 0.00247 | zinc finger protein 569 [Source:HGNC Symbol;Acc:HGNC:24737]                                          |
| <i>DPH1</i>             | 17 | p13.3  | 0.56 | 0.00001 | diphthamide biosynthesis 1 [Source:HGNC Symbol;Acc:HGNC:3003]                                        |
| <i>CTD-2349P21.5</i>    | 17 | q11.2  | 0.56 | 0.00146 |                                                                                                      |
| <i>ZSCAN12</i>          | 6  | p22.1  | 0.56 | 0.00203 | zinc finger and SCAN domain containing 12 [Source:HGNC Symbol;Acc:HGNC:13172]                        |
| <i>FAM221A</i>          | 7  | p15.3  | 0.55 | 0.00666 | family with sequence similarity 221, member A [Source:HGNC Symbol;Acc:HGNC:27977]                    |
| <i>ENO3</i>             | 17 | p13.2  | 0.54 | 0.00144 | enolase 3 (beta, muscle) [Source:HGNC Symbol;Acc:HGNC:3354]                                          |
| <i>RP11-481J2.4</i>     | 16 | q21    | 0.54 | 0.00326 |                                                                                                      |
| <i>LINC00641</i>        | 14 | q11.2  | 0.54 | 0.00348 | long intergenic non-protein coding RNA 641 [Source:HGNC Symbol;Acc:HGNC:27511]                       |

|                                                                                       |    |        |       |         |                                                                                       |
|---------------------------------------------------------------------------------------|----|--------|-------|---------|---------------------------------------------------------------------------------------|
| <i>TASP1</i>                                                                          | 20 | p12.1  | 0.54  | 0.00365 | taspace, threonine aspartase, 1 [Source:HGNC Symbol;Acc:HGNC:15859]                   |
| <i>CRAMP1L</i>                                                                        | 16 | p13.3  | 0.54  | 0.00499 | Crm, cramped-like (Drosophila) [Source:HGNC Symbol;Acc:HGNC:14122]                    |
| <i>CTC-360G5.9</i>                                                                    | 19 | q13.2  | 0.51  | 0.00636 |                                                                                       |
| <i>PATZ1</i>                                                                          | 22 | q12.2  | 0.51  | 0.00754 | POZ (BTB) and AT hook containing zinc finger 1 [Source:HGNC Symbol;Acc:HGNC:13071]    |
| <i>ZNF582-AS1</i>                                                                     | 19 | q13.43 | 0.50  | 0.00717 | ZNF582 antisense RNA 1 (head to head) [Source:HGNC Symbol;Acc:HGNC:25213]             |
| <i>THAP7-AS1</i>                                                                      | 22 | q11.21 | 0.48  | 0.00175 | THAP7 antisense RNA 1 [Source:HGNC Symbol;Acc:HGNC:41013]                             |
| <i>CCDC97</i>                                                                         | 19 | q13.2  | 0.47  | 0.00536 | coiled-coil domain containing 97 [Source:HGNC Symbol;Acc:HGNC:28289]                  |
| <i>FUBP3</i>                                                                          | 9  | q34.11 | 0.45  | 0.00085 | far upstream element (FUSE) binding protein 3 [Source:HGNC Symbol;Acc:HGNC:4005]      |
| <i>NAT10</i>                                                                          | 11 | p13    | 0.44  | 0.0001  | N-acetyltransferase 10 (GCN5-related) [Source:HGNC Symbol;Acc:HGNC:29830]             |
| <i>DDHD2</i>                                                                          | 8  | p11.23 | 0.44  | 0.00563 | DDHD domain containing 2 [Source:HGNC Symbol;Acc:HGNC:29106]                          |
| <i>DCAF4</i>                                                                          | 14 | q24.2  | 0.43  | 0.00158 | DDB1 and CUL4 associated factor 4 [Source:HGNC Symbol;Acc:HGNC:20229]                 |
| <i>RP11-159F24.6</i>                                                                  | 5  | p12    | 0.41  | 0.00466 |                                                                                       |
| <i>CTB-131B5.5</i>                                                                    | 5  | q31.3  | 0.40  | 0.00862 |                                                                                       |
| <i>CDC14A</i>                                                                         | 1  | p21.2  | 0.39  | 0.00258 | cell division cycle 14A [Source:HGNC Symbol;Acc:HGNC:1718]                            |
| <i>AC005562.1</i>                                                                     | 19 | p13.11 | 0.36  | 0.00499 |                                                                                       |
| <i>TMEM192</i>                                                                        | 4  | q32.3  | 0.34  | 0.00064 | transmembrane protein 192 [Source:HGNC Symbol;Acc:HGNC:26775]                         |
| <i>RPS6KA5</i>                                                                        | 14 | q32.11 | 0.34  | 0.00563 | ribosomal protein S6 kinase, 90kDa, polypeptide 5 [Source:HGNC Symbol;Acc:HGNC:10434] |
| <i>PDCD6IP</i>                                                                        | 3  | p22.3  | 0.33  | 0.0027  | programmed cell death 6 interacting protein [Source:HGNC Symbol;Acc:HGNC:8766]        |
| <i>MYBBP1A</i>                                                                        | 17 | p13.2  | 0.31  | 0.0049  | MYB binding protein (P160) 1a [Source:HGNC Symbol;Acc:HGNC:7546]                      |
| <i>YLPM1</i>                                                                          | 14 | q24.3  | 0.31  | 0.00636 | YLP motif containing 1 [Source:HGNC Symbol;Acc:HGNC:17798]                            |
| <i>AC074117.10</i>                                                                    | 2  | p23.3  | 0.29  | 0.00422 |                                                                                       |
| <i>APOOL</i>                                                                          | X  | q21.1  | 0.27  | 0.00234 | apolipoprotein O-like [Source:HGNC Symbol;Acc:HGNC:24009]                             |
| <i>SMG6</i>                                                                           | 17 | p13.3  | 0.27  | 0.00346 | SMG6 nonsense mediated mRNA decay factor [Source:HGNC Symbol;Acc:HGNC:17809]          |
| <b>409 Genes downregulated in t(11;19)(q23;p13.3) compared to t(11;19)(q23;p13.1)</b> |    |        |       |         |                                                                                       |
| <i>AC017002.4</i>                                                                     |    |        | -5.45 | 0.00376 |                                                                                       |
| <i>NECAB2</i>                                                                         | 16 | q23.3  | -3.03 | 0.0005  | N-terminal EF-hand calcium binding protein 2 [Source:HGNC Symbol;Acc:HGNC:23746]      |
| <i>TRBV13</i>                                                                         | 7  | q34    | -2.98 | 0.00002 | T cell receptor beta variable 13 [Source:HGNC Symbol;Acc:HGNC:12188]                  |
| <i>RP11-545N8.3</i>                                                                   | 12 | q13.3  | -2.76 | 0.00003 |                                                                                       |
| <i>LYVE1</i>                                                                          | 12 | q15    | -2.63 | 0.00014 | lysozyme [Source:HGNC Symbol;Acc:HGNC:6740]                                           |
| <i>CD14</i>                                                                           | 5  | q31.3  | -2.62 | 0.00053 | CD14 molecule [Source:HGNC Symbol;Acc:HGNC:1628]                                      |

|                      |    |        |       |         |                                                                                                                        |
|----------------------|----|--------|-------|---------|------------------------------------------------------------------------------------------------------------------------|
| <i>SERPINA1</i>      | 14 | q32.13 | -2.57 | 0.00004 | serpin peptidase inhibitor, clade A (alpha-1 antiproteinase, antitrypsin), member 1 [Source:HGNC Symbol;Acc:HGNC:8941] |
| <i>EMR3</i>          | 19 | p13.12 | -2.52 | 0.00851 | egf-like module containing, mucin-like, hormone receptor-like 3 [Source:HGNC Symbol;Acc:HGNC:23647]                    |
| <i>OR52K1</i>        | 11 | p15.4  | -2.51 | 0.00117 | olfactory receptor, family 52, subfamily K, member 1 [Source:HGNC Symbol;Acc:HGNC:15222]                               |
| <i>AC008984.2</i>    | 2  | q24.3  | -2.46 | 0       |                                                                                                                        |
| <i>MPO</i>           | 17 | q22    | -2.45 | 0.00019 | myeloperoxidase [Source:HGNC Symbol;Acc:HGNC:7218]                                                                     |
| <i>RP11-597D13.9</i> | 4  | q32.1  | -2.42 | 0.00121 |                                                                                                                        |
| <i>FFAR2</i>         | 19 | q13.12 | -2.41 | 0       | free fatty acid receptor 2 [Source:HGNC Symbol;Acc:HGNC:4501]                                                          |
| <i>VCAN</i>          | 5  | q14.2  | -2.41 | 0.00128 | versican [Source:HGNC Symbol;Acc:HGNC:2464]                                                                            |
| <i>FCGR3A</i>        | 1  | q23.3  | -2.38 | 0.00001 | Fc fragment of IgG, low affinity IIIa, receptor (CD16a) [Source:HGNC Symbol;Acc:HGNC:3619]                             |
| <i>CLEC4E</i>        | 12 | p13.31 | -2.37 | 0       | C-type lectin domain family 4, member E [Source:HGNC Symbol;Acc:HGNC:14555]                                            |
| <i>RP11-351I24.1</i> | 11 | p15.4  | -2.37 | 0.00328 |                                                                                                                        |
| <i>APOBEC3A</i>      | 22 | q13.1  | -2.33 | 0       | apolipoprotein B mRNA editing enzyme, catalytic polypeptide-like 3A [Source:HGNC Symbol;Acc:HGNC:17343]                |
| <i>SLC11A1</i>       | 2  | q35    | -2.33 | 0       | solute carrier family 11 (proton-coupled divalent metal ion transporter), member 1 [Source:HGNC Symbol;Acc:HGNC:10907] |
| <i>RP11-156K13.3</i> | 8  | p22    | -2.33 | 0.00175 |                                                                                                                        |
| <i>STK32B</i>        | 4  | p16.2  | -2.33 | 0.00363 | serine/threonine kinase 32B [Source:HGNC Symbol;Acc:HGNC:14217]                                                        |
| <i>FCN1</i>          | 9  | q34.3  | -2.32 | 0.00007 | ficolin (collagen/fibrinogen domain containing) 1 [Source:HGNC Symbol;Acc:HGNC:3623]                                   |
| <i>TRBV20-1</i>      | 7  | q34    | -2.32 | 0.00007 | T cell receptor beta variable 20-1 [Source:HGNC Symbol;Acc:HGNC:12196]                                                 |
| <i>CPAMD8</i>        | 19 | p13.11 | -2.26 | 0.00044 | C3 and PZP-like, alpha-2-macroglobulin domain containing 8 [Source:HGNC Symbol;Acc:HGNC:23228]                         |
| <i>TRIM7</i>         | 5  | q35.3  | -2.25 | 0.00101 | tripartite motif containing 7 [Source:HGNC Symbol;Acc:HGNC:16278]                                                      |
| <i>DPYD</i>          | 1  | p21.3  | -2.24 | 0.00001 | dihydropyrimidine dehydrogenase [Source:HGNC Symbol;Acc:HGNC:3012]                                                     |
| <i>BCL2A1</i>        | 15 | q25.1  | -2.22 | 0       | BCL2-related protein A1 [Source:HGNC Symbol;Acc:HGNC:991]                                                              |
| <i>TRBV14</i>        | 7  | q34    | -2.22 | 0.00006 | T cell receptor beta variable 14 [Source:HGNC Symbol;Acc:HGNC:12189]                                                   |
| <i>CFH</i>           | 1  | q31.3  | -2.21 | 0       | complement factor H [Source:HGNC Symbol;Acc:HGNC:4883]                                                                 |
| <i>PKLR</i>          | 1  | q22    | -2.19 | 0.00246 | pyruvate kinase, liver and RBC [Source:HGNC Symbol;Acc:HGNC:9020]                                                      |
| <i>CD96</i>          | 3  | q13.13 | -2.15 | 0       | CD96 molecule [Source:HGNC Symbol;Acc:HGNC:16892]                                                                      |
| <i>LYZ</i>           | 3  | q13.33 | -2.14 | 0       | MYCBP-associated, testis expressed 1 [Source:HGNC Symbol;Acc:HGNC:24010]                                               |
| <i>AC017002.1</i>    | 2  | q13    | -2.14 | 0.00053 |                                                                                                                        |
| <i>VIPR1</i>         | 3  | p22.1  | -2.13 | 0       | vasoactive intestinal peptide receptor 1 [Source:HGNC Symbol;Acc:HGNC:12694]                                           |

|                  |    |        |       |         |                                                                                                                             |
|------------------|----|--------|-------|---------|-----------------------------------------------------------------------------------------------------------------------------|
| <i>WASF1</i>     | 6  | q21    | -2.13 | 0.00005 | WAS protein family, member 1 [Source:HGNC Symbol;Acc:HGNC:12732]                                                            |
| <i>LINC01272</i> | 20 | q13.13 | -2.12 | 0       | long intergenic non-protein coding RNA 1272 [Source:HGNC Symbol;Acc:HGNC:50328]                                             |
| <i>CA1</i>       | 8  | q21.2  | -2.11 | 0.00185 | carbonic anhydrase I [Source:HGNC Symbol;Acc:HGNC:1368]                                                                     |
| <i>VNN2</i>      | 6  | q23.2  | -2.08 | 0.00298 | vanin 2 [Source:HGNC Symbol;Acc:HGNC:12706]                                                                                 |
| <i>PLBD1</i>     | 12 | p13.1  | -2.06 | 0.004   | phospholipase B domain containing 1 [Source:HGNC Symbol;Acc:HGNC:26215]                                                     |
| <i>S100A9</i>    | 1  | q21.3  | -2.06 | 0.00487 | S100 calcium binding protein A9 [Source:HGNC Symbol;Acc:HGNC:10499]                                                         |
| <i>SLC7A7</i>    | 14 | q11.2  | -2.05 | 0.00017 | solute carrier family 7 (amino acid transporter light chain, y+L system), member 7 [Source:HGNC Symbol;Acc:HGNC:11065]      |
| <i>MYL4</i>      | 17 | q21.32 | -2.04 | 0.00077 | myosin, light chain 4, alkali; atrial, embryonic [Source:HGNC Symbol;Acc:HGNC:7585]                                         |
| <i>CDA</i>       | 1  | p36.12 | -2.02 | 0.00305 | cytidine deaminase [Source:HGNC Symbol;Acc:HGNC:1712]                                                                       |
| <i>ARG1</i>      | 6  | q23.2  | -2.02 | 0.0034  | arginase 1 [Source:HGNC Symbol;Acc:HGNC:663]                                                                                |
| <i>S100A8</i>    | 1  | q21.3  | -2.02 | 0.00529 | S100 calcium binding protein A8 [Source:HGNC Symbol;Acc:HGNC:10498]                                                         |
| <i>ADORA2A</i>   | 22 | q11.23 | -2.01 | 0.00014 | adenosine A2a receptor [Source:HGNC Symbol;Acc:HGNC:263]                                                                    |
| <i>C19orf38</i>  | 19 | p13.2  | -1.97 | 0       | chromosome 19 open reading frame 38 [Source:HGNC Symbol;Acc:HGNC:34073]                                                     |
| <i>IER3</i>      | 6  | p21.33 | -1.97 | 0       | immediate early response 3 [Source:HGNC Symbol;Acc:HGNC:5392]                                                               |
| <i>FPR1</i>      | 19 | q13.41 | -1.96 | 0.00421 | formyl peptide receptor 1 [Source:HGNC Symbol;Acc:HGNC:3826]                                                                |
| <i>FCN2</i>      | 9  | q34.3  | -1.96 | 0.0054  | ficolin (collagen/fibrinogen domain containing lectin) 2 [Source:HGNC Symbol;Acc:HGNC:3624]                                 |
| <i>ADM</i>       | 11 | p15.4  | -1.95 | 0.00001 | adrenomedullin [Source:HGNC Symbol;Acc:HGNC:259]                                                                            |
| <i>CLEC7A</i>    | 12 | p13.2  | -1.95 | 0.00026 | C-type lectin domain family 7, member A [Source:HGNC Symbol;Acc:HGNC:14558]                                                 |
| <i>RHAG</i>      | 6  | p12.3  | -1.95 | 0.00481 | Rh-associated glycoprotein [Source:HGNC Symbol;Acc:HGNC:10006]                                                              |
| <i>CYBB</i>      | X  | p21.1  | -1.92 | 0.00327 | cytochrome b-245, beta polypeptide [Source:HGNC Symbol;Acc:HGNC:2578]                                                       |
| <i>CAMK1</i>     | 3  | p25.3  | -1.91 | 0.00129 | calcium/calmodulin-dependent protein kinase I [Source:HGNC Symbol;Acc:HGNC:1459]                                            |
| <i>CD36</i>      | 7  | q21.11 | -1.90 | 0.00006 | CD36 molecule (thrombospondin receptor) [Source:HGNC Symbol;Acc:HGNC:1663]                                                  |
| <i>SLC2A3</i>    | 12 | p13.31 | -1.89 | 0       | solute carrier family 2 (facilitated glucose transporter), member 3 [Source:HGNC Symbol;Acc:HGNC:11007]                     |
| <i>CECR1</i>     | 22 | q11.1  | -1.89 | 0       | cat eye syndrome chromosome region, candidate 1 [Source:HGNC Symbol;Acc:HGNC:1839]                                          |
| <i>CLMN</i>      | 14 | q32.13 | -1.88 | 0       | calmin (calponin-like, transmembrane) [Source:HGNC Symbol;Acc:HGNC:19972]                                                   |
| <i>LILRB2</i>    | 19 | q13.42 | -1.88 | 0       | leukocyte immunoglobulin-like receptor, subfamily B (with TM and ITIM domains), member 2 [Source:HGNC Symbol;Acc:HGNC:6606] |
| <i>FAM178B</i>   | 2  | q11.2  | -1.88 | 0.00368 | family with sequence similarity 178, member B [Source:HGNC Symbol;Acc:HGNC:28036]                                           |
| <i>HBD</i>       | 11 | p15.4  | -1.87 | 0.00595 | hemoglobin, delta [Source:HGNC Symbol;Acc:HGNC:4829]                                                                        |



|                       |    |        |       |         |                                                                                                                          |
|-----------------------|----|--------|-------|---------|--------------------------------------------------------------------------------------------------------------------------|
| <i>RP11-256L6.3</i>   | 12 | q23.1  | -1.84 | 0.00017 |                                                                                                                          |
| <i>CRISPLD2</i>       | 16 | q24.1  | -1.83 | 0       | cysteine-rich secretory protein LCCL domain containing 2 [Source:HGNC Symbol;Acc:HGNC:25248]                             |
| <i>CLEC12A</i>        | 12 | p13.31 | -1.83 | 0.00068 | C-type lectin domain family 12, member A [Source:HGNC Symbol;Acc:HGNC:31713]                                             |
| <i>RHCE</i>           | 1  | p36.11 | -1.83 | 0.00883 | Rh blood group, CcEe antigens [Source:HGNC Symbol;Acc:HGNC:10008]                                                        |
| <i>GYPC</i>           | 2  | q14.3  | -1.78 | 0       | glycophorin C (Gerbich blood group) [Source:HGNC Symbol;Acc:HGNC:4704]                                                   |
| <i>EPB42</i>          | 15 | q15.2  | -1.78 | 0.00278 | erythrocyte membrane protein band 4.2 [Source:HGNC Symbol;Acc:HGNC:3381]                                                 |
| <i>CLEC12B</i>        | 12 | p13.2  | -1.77 | 0.00002 | C-type lectin domain family 12, member B [Source:HGNC Symbol;Acc:HGNC:31966]                                             |
| <i>AKR1C3</i>         | 10 | p15.1  | -1.76 | 0.00026 | aldo-keto reductase family 1, member C3 [Source:HGNC Symbol;Acc:HGNC:386]                                                |
| <i>PTGER2</i>         | 14 | q22.1  | -1.75 | 0.00035 | prostaglandin E receptor 2 (subtype EP2), 53kDa [Source:HGNC Symbol;Acc:HGNC:9594]                                       |
| <i>CTD-2105E13.14</i> | 19 | q13.42 | -1.75 | 0.00363 |                                                                                                                          |
| <i>FAM65C</i>         | 20 | q13.13 | -1.75 | 0.0077  | family with sequence similarity 65, member C [Source:HGNC Symbol;Acc:HGNC:16168]                                         |
| <i>ANK1</i>           | 8  | p11.21 | -1.74 | 0.00183 | ankyrin 1, erythrocytic [Source:HGNC Symbol;Acc:HGNC:492]                                                                |
| <i>HP</i>             | 16 | q22.2  | -1.74 | 0.00666 | haptoglobin [Source:HGNC Symbol;Acc:HGNC:5141]                                                                           |
| <i>SELL</i>           | 1  | q24.2  | -1.73 | 0.00001 | selectin L [Source:HGNC Symbol;Acc:HGNC:10720]                                                                           |
| <i>S1PR3</i>          | 9  | q22.1  | -1.72 | 0       | sphingosine-1-phosphate receptor 3 [Source:HGNC Symbol;Acc:HGNC:3167]                                                    |
| <i>CKAP4</i>          | 12 | q23.3  | -1.70 | 0       | cytoskeleton-associated protein 4 [Source:HGNC Symbol;Acc:HGNC:16991]                                                    |
| <i>SLC16A6</i>        | 17 | q24.2  | -1.69 | 0.00137 | solute carrier family 16, member 6 [Source:HGNC Symbol;Acc:HGNC:10927]                                                   |
| <i>CPNE7</i>          | 16 | q24.3  | -1.69 | 0.00338 | copine VII [Source:HGNC Symbol;Acc:HGNC:2320]                                                                            |
| <i>PTGS2</i>          | 1  | q31.1  | -1.67 | 0       | prostaglandin-endoperoxide synthase 2 (prostaglandin G/H synthase and cyclooxygenase) [Source:HGNC Symbol;Acc:HGNC:9605] |
| <i>BCAT1</i>          | 12 | p12.1  | -1.67 | 0.0001  | branched chain amino-acid transaminase 1, cytosolic [Source:HGNC Symbol;Acc:HGNC:976]                                    |
| <i>P2RY13</i>         | 3  | q25.1  | -1.66 | 0.00075 | purinergic receptor P2Y, G-protein coupled, 13 [Source:HGNC Symbol;Acc:HGNC:4537]                                        |
| <i>PADI4</i>          | 1  | p36.13 | -1.65 | 0.00588 | peptidyl arginine deiminase, type IV [Source:HGNC Symbol;Acc:HGNC:18368]                                                 |
| <i>TRBV12-4</i>       | 7  | q34    | -1.65 | 0.00691 | T cell receptor beta variable 12-4 [Source:HGNC Symbol;Acc:HGNC:12186]                                                   |
| <i>NME8</i>           | 7  | p14.1  | -1.63 | 0.00563 | NME/NM23 family member 8 [Source:HGNC Symbol;Acc:HGNC:16473]                                                             |
| <i>CTSS</i>           | 1  | q21.3  | -1.62 | 0       | cathepsin S [Source:HGNC Symbol;Acc:HGNC:2545]                                                                           |
| <i>TNFRSF1B</i>       | 1  | p36.22 | -1.62 | 0.00098 | tumor necrosis factor receptor superfamily, member 1B [Source:HGNC Symbol;Acc:HGNC:11917]                                |
| <i>GPR183</i>         | 13 | q32.3  | -1.61 | 0.0006  | G protein-coupled receptor 183 [Source:HGNC Symbol;Acc:HGNC:3128]                                                        |
| <i>SLA</i>            | 8  | q24.22 | -1.61 | 0.00657 | Src-like-adaptor [Source:HGNC Symbol;Acc:HGNC:10902]                                                                     |
| <i>FXYP6</i>          | 11 | q23.3  | -1.61 | 0.00946 | FXYP domain containing ion transport regulator 6 [Source:HGNC Symbol;Acc:HGNC:4030]                                      |

|                       |    |        |       |         |                                                                                                                    |
|-----------------------|----|--------|-------|---------|--------------------------------------------------------------------------------------------------------------------|
| <i>CD300LB</i>        | 17 | q25.1  | -1.60 | 0.00007 | CD300 molecule-like family member b [Source:HGNC Symbol;Acc:HGNC:30811]                                            |
| <i>MCEMP1</i>         | 19 | p13.2  | -1.60 | 0.00427 | mast cell-expressed membrane protein 1 [Source:HGNC Symbol;Acc:HGNC:27291]                                         |
| <i>MNDA</i>           | 1  | q23.1  | -1.60 | 0.00544 | myeloid cell nuclear differentiation antigen [Source:HGNC Symbol;Acc:HGNC:7183]                                    |
| <i>TNFSF8</i>         | 9  | q33.1  | -1.59 | 0       | tumor necrosis factor (ligand) superfamily, member 8 [Source:HGNC Symbol;Acc:HGNC:11938]                           |
| <i>CEBPB</i>          | 20 | q13.13 | -1.59 | 0.00001 | CCAAT/enhancer binding protein (C/EBP), beta [Source:HGNC Symbol;Acc:HGNC:1834]                                    |
| <i>MZB1</i>           | 5  | q31.2  | -1.59 | 0.0023  | marginal zone B and B1 cell-specific protein [Source:HGNC Symbol;Acc:HGNC:30125]                                   |
| <i>FCAR</i>           | 19 | q13.42 | -1.58 | 0.00023 | Fc fragment of IgA, receptor for [Source:HGNC Symbol;Acc:HGNC:3608]                                                |
| <i>HAL</i>            | 12 | q23.1  | -1.57 | 0.00021 | histidine ammonia-lyase [Source:HGNC Symbol;Acc:HGNC:4806]                                                         |
| <i>RP4-753P9.3</i>    | X  | q26.1  | -1.56 | 0.00035 |                                                                                                                    |
| <i>DAGLA</i>          | 11 | q12.2  | -1.55 | 0.00002 | diacylglycerol lipase, alpha [Source:HGNC Symbol;Acc:HGNC:1165]                                                    |
| <i>NCF2</i>           | 1  | q25.3  | -1.54 | 0       | neutrophil cytosolic factor 2 [Source:HGNC Symbol;Acc:HGNC:7661]                                                   |
| <i>CMTM2</i>          | 16 | q21    | -1.53 | 0.00077 | CKLF-like MARVEL transmembrane domain containing 2 [Source:HGNC Symbol;Acc:HGNC:19173]                             |
| <i>ITGB2-AS1</i>      | 21 | q22.3  | -1.53 | 0.00104 | ITGB2 antisense RNA 1 [Source:HGNC Symbol;Acc:HGNC:44304]                                                          |
| <i>CTB-61M7.2</i>     | 19 | q13.42 | -1.52 | 0.00115 |                                                                                                                    |
| <i>IFI30</i>          | 19 | p13.11 | -1.52 | 0.00983 | interferon, gamma-inducible protein 30 [Source:HGNC Symbol;Acc:HGNC:5398]                                          |
| <i>S100A11</i>        | 1  | q21.3  | -1.50 | 0.00004 | S100 calcium binding protein A11 [Source:HGNC Symbol;Acc:HGNC:10488]                                               |
| <i>LILRA4</i>         | 19 | q13.42 | -1.50 | 0.00126 | leukocyte immunoglobulin-like receptor, subfamily A (with TM domain), member 4 [Source:HGNC Symbol;Acc:HGNC:15503] |
| <i>IGLV1-40</i>       | 22 | q11.22 | -1.50 | 0.00808 | immunoglobulin lambda variable 1-40 [Source:HGNC Symbol;Acc:HGNC:5877]                                             |
| <i>FYN</i>            | 6  | q21    | -1.49 | 0       | FYN proto-oncogene, Src family tyrosine kinase [Source:HGNC Symbol;Acc:HGNC:4037]                                  |
| <i>TAL1</i>           | 1  | p33    | -1.49 | 0.00499 | T-cell acute lymphocytic leukemia 1 [Source:HGNC Symbol;Acc:HGNC:11556]                                            |
| <i>PTAFR</i>          | 1  | p35.3  | -1.48 | 0.00019 | platelet-activating factor receptor [Source:HGNC Symbol;Acc:HGNC:9582]                                             |
| <i>IGHA2</i>          | 14 | q32.33 | -1.48 | 0.00366 | immunoglobulin heavy constant alpha 2 (A2m marker) [Source:HGNC Symbol;Acc:HGNC:5479]                              |
| <i>XXbac-B33L19.4</i> | 22 | q11.21 | -1.48 | 0.00388 |                                                                                                                    |
| <i>DMTN</i>           | 8  | p21.3  | -1.48 | 0.00733 | dematin actin binding protein [Source:HGNC Symbol;Acc:HGNC:3382]                                                   |
| <i>SERPINB10</i>      | 18 | q21.33 | -1.47 | 0.00119 | serpin peptidase inhibitor, clade B (ovalbumin), member 10 [Source:HGNC Symbol;Acc:HGNC:8942]                      |
| <i>IGLV2-14</i>       | 22 | q11.22 | -1.47 | 0.00437 | immunoglobulin lambda variable 2-14 [Source:HGNC Symbol;Acc:HGNC:5888]                                             |
| <i>CYTIP</i>          | 2  | q24.1  | -1.46 | 0.00156 | cytohesin 1 interacting protein [Source:HGNC Symbol;Acc:HGNC:9506]                                                 |
| <i>GIMAP4</i>         | 7  | q36.1  | -1.46 | 0.00233 | GTPase, IMAP family member 4 [Source:HGNC Symbol;Acc:HGNC:21872]                                                   |
| <i>LLNLR-470E3.1</i>  | 19 | q13.41 | -1.46 | 0.00343 |                                                                                                                    |

|                          |    |        |       |         |                                                                                                                                          |
|--------------------------|----|--------|-------|---------|------------------------------------------------------------------------------------------------------------------------------------------|
| <i>C1QTNF4</i>           | 11 | p11.2  | -1.46 | 0.00622 | C1q and tumor necrosis factor related protein 4 [Source:HGNC Symbol;Acc:HGNC:14346]                                                      |
| <i>CTB-31N19.3</i>       | 16 | p12.2  | -1.45 | 0       |                                                                                                                                          |
| <i>ACSL1</i>             | 4  | q35.1  | -1.45 | 0.00061 | acyl-CoA synthetase long-chain family member 1 [Source:HGNC Symbol;Acc:HGNC:3569]                                                        |
| <i>FAM134B</i>           | 5  | p15.1  | -1.44 | 0.00002 | family with sequence similarity 134, member B [Source:HGNC Symbol;Acc:HGNC:25964]                                                        |
| <i>TMEM56</i>            | 1  | p21.3  | -1.44 | 0.00056 | transmembrane protein 56 [Source:HGNC Symbol;Acc:HGNC:26477]                                                                             |
| <i>HBEGF</i>             | 5  | q31.3  | -1.44 | 0.00155 | heparin-binding EGF-like growth factor [Source:HGNC Symbol;Acc:HGNC:3059]                                                                |
| <i>CRHBP</i>             | 5  | q13.3  | -1.44 | 0.00331 | corticotropin releasing hormone binding protein [Source:HGNC Symbol;Acc:HGNC:2356]                                                       |
| <i>CD48</i>              | 1  | q23.3  | -1.43 | 0.0001  | CD48 molecule [Source:HGNC Symbol;Acc:HGNC:1683]                                                                                         |
| <i>IGLV1-44</i>          | 22 | q11.22 | -1.43 | 0.00897 | immunoglobulin lambda variable 1-44 [Source:HGNC Symbol;Acc:HGNC:5879]                                                                   |
| <i>AC073254.1</i>        | 2  | q37.1  | -1.42 | 0       |                                                                                                                                          |
| <i>FCER1G</i>            | 1  | q23.3  | -1.42 | 0       | Fc fragment of IgE, high affinity I, receptor for; gamma polypeptide [Source:HGNC Symbol;Acc:HGNC:3611]                                  |
| <i>REEP5</i>             | 5  | q22.2  | -1.42 | 0.00639 | receptor accessory protein 5 [Source:HGNC Symbol;Acc:HGNC:30077]                                                                         |
| <i>ST3GAL6</i>           | 3  | q12.1  | -1.41 | 0       | ST3 beta-galactoside alpha-2,3-sialyltransferase 6 [Source:HGNC Symbol;Acc:HGNC:18080]                                                   |
| <i>LILRB3</i>            | 19 | q13.42 | -1.41 | 0.00062 | leukocyte immunoglobulin-like receptor, subfamily B (with TM and ITIM domains), member 3 [Source:HGNC Symbol;Acc:HGNC:6607]              |
| <i>IGSF6</i>             | 16 | p12.2  | -1.41 | 0.00064 | immunoglobulin superfamily, member 6 [Source:HGNC Symbol;Acc:HGNC:5953]                                                                  |
| <i>IQSEC1</i>            | 3  | p25.2  | -1.41 | 0.00152 | IQ motif and Sec7 domain 1 [Source:HGNC Symbol;Acc:HGNC:29112]                                                                           |
| <i>XXbac-BPG252P9.10</i> | 6  | p21.33 | -1.41 | 0.00261 |                                                                                                                                          |
| <i>RRAS</i>              | 19 | q13.33 | -1.39 | 0.00003 | related RAS viral (r-ras) oncogene homolog [Source:HGNC Symbol;Acc:HGNC:10447]                                                           |
| <i>NAMPT</i>             | 7  | q22.3  | -1.39 | 0.00007 | nicotinamide phosphoribosyltransferase [Source:HGNC Symbol;Acc:HGNC:30092]                                                               |
| <i>SRD5A1</i>            | 5  | p15.31 | -1.38 | 0.00006 | steroid-5-alpha-reductase, alpha polypeptide 1 (3-oxo-5 alpha-steroid delta 4-dehydrogenase alpha 1) [Source:HGNC Symbol;Acc:HGNC:11284] |
| <i>CCRL2</i>             | 3  | p21.31 | -1.38 | 0.0057  | chemokine (C-C motif) receptor-like 2 [Source:HGNC Symbol;Acc:HGNC:1612]                                                                 |
| <i>LGI4</i>              | 19 | q13.12 | -1.38 | 0.00806 | leucine-rich repeat LGI family, member 4 [Source:HGNC Symbol;Acc:HGNC:18712]                                                             |
| <i>ITGAM</i>             | 16 | p11.2  | -1.37 | 0.00075 | integrin, alpha M (complement component 3 receptor 3 subunit) [Source:HGNC Symbol;Acc:HGNC:6149]                                         |
| <i>RP11-373D23.2</i>     | 2  | p23.2  | -1.36 | 0.00117 |                                                                                                                                          |
| <i>MME</i>               | 3  | q25.2  | -1.36 | 0.00427 | membrane metallo-endopeptidase [Source:HGNC Symbol;Acc:HGNC:7154]                                                                        |
| <i>FGR</i>               | 1  | p35.3  | -1.34 | 0.00013 | FGR proto-oncogene, Src family tyrosine kinase [Source:HGNC Symbol;Acc:HGNC:3697]                                                        |
| <i>THEMIS2</i>           | 1  | p35.3  | -1.34 | 0.00075 | thymocyte selection associated family member 2 [Source:HGNC Symbol;Acc:HGNC:16839]                                                       |
| <i>LILRA1</i>            | 19 | q13.42 | -1.34 | 0.00473 | leukocyte immunoglobulin-like receptor, subfamily A (with TM domain), member 1 [Source:HGNC Symbol;Acc:HGNC:6602]                        |

|                      |    |        |       |         |                                                                                               |
|----------------------|----|--------|-------|---------|-----------------------------------------------------------------------------------------------|
| <i>E2F2</i>          | 1  | p36.12 | -1.33 | 0.00007 | E2F transcription factor 2 [Source:HGNC Symbol;Acc:HGNC:3114]                                 |
| <i>JAZF1</i>         | 7  | p15.1  | -1.33 | 0.00027 | JAZF zinc finger 1 [Source:HGNC Symbol;Acc:HGNC:28917]                                        |
| <i>RHD</i>           | 1  | p36.11 | -1.33 | 0.00446 | Rh blood group, D antigen [Source:HGNC Symbol;Acc:HGNC:10009]                                 |
| <i>NAMPTL</i>        | 10 | p11.21 | -1.32 | 0.00026 | nicotinamide phosphoribosyltransferase pseudogene 1                                           |
| <i>PITPNC1</i>       | 17 | q24.2  | -1.31 | 0       | phosphatidylinositol transfer protein, cytoplasmic 1 [Source:HGNC Symbol;Acc:HGNC:21045]      |
| <i>PNPLA1</i>        | 6  | p21.31 | -1.31 | 0.00029 | patatin-like phospholipase domain containing 1 [Source:HGNC Symbol;Acc:HGNC:21246]            |
| <i>SYN2</i>          | 3  | p25.2  | -1.31 | 0.00278 | synapsin II [Source:HGNC Symbol;Acc:HGNC:11495]                                               |
| <i>IL1RL1</i>        | 2  | q12.1  | -1.30 | 0.00521 | interleukin 1 receptor-like 1 [Source:HGNC Symbol;Acc:HGNC:5998]                              |
| <i>OSM</i>           | 22 | q12.2  | -1.29 | 0       | oncostatin M [Source:HGNC Symbol;Acc:HGNC:8506]                                               |
| <i>TFR2</i>          | 7  | q22.1  | -1.29 | 0.00006 | transferrin receptor 2 [Source:HGNC Symbol;Acc:HGNC:11762]                                    |
| <i>HLA-G</i>         | 6  | p22.1  | -1.29 | 0.0001  | major histocompatibility complex, class I, G [Source:HGNC Symbol;Acc:HGNC:4964]               |
| <i>MRV1</i>          | 11 | p15.4  | -1.29 | 0.00014 | murine retrovirus integration site 1 homolog [Source:HGNC Symbol;Acc:HGNC:7237]               |
| <i>HCAR3</i>         | 12 | q24.31 | -1.28 | 0       | hydroxycarboxylic acid receptor 3 [Source:HGNC Symbol;Acc:HGNC:16824]                         |
| <i>TRBV28</i>        | 7  | q34    | -1.28 | 0.00001 | T cell receptor beta variable 28 [Source:HGNC Symbol;Acc:HGNC:12209]                          |
| <i>APCDD1</i>        | 18 | p11.22 | -1.28 | 0.00377 | adenomatosis polyposis coli down-regulated 1 [Source:HGNC Symbol;Acc:HGNC:15718]              |
| <i>IGLV7-46</i>      | 22 | q11.22 | -1.28 | 0.00609 | immunoglobulin lambda variable 7-46 (gene/pseudogene) [Source:HGNC Symbol;Acc:HGNC:5930]      |
| <i>RP11-295G20.2</i> | 1  | q42.2  | -1.27 | 0       |                                                                                               |
| <i>BLVRB</i>         | 19 | q13.2  | -1.27 | 0       | biliverdin reductase B (flavin reductase (NADPH)) [Source:HGNC Symbol;Acc:HGNC:1063]          |
| <i>SASH3</i>         | X  | q26.1  | -1.27 | 0.00012 | SAM and SH3 domain containing 3 [Source:HGNC Symbol;Acc:HGNC:15975]                           |
| <i>RASGEF1B</i>      | 4  | q21.22 | -1.26 | 0.00005 | RasGEF domain family, member 1B [Source:HGNC Symbol;Acc:HGNC:24881]                           |
| <i>GCH1</i>          | 14 | q22.2  | -1.26 | 0.00008 | GTP cyclohydrolase 1 [Source:HGNC Symbol;Acc:HGNC:4193]                                       |
| <i>TRBC2</i>         | 7  | q34    | -1.26 | 0.0002  | T cell receptor beta constant 2 [Source:HGNC Symbol;Acc:HGNC:12157]                           |
| <i>IVNS1ABP</i>      | 1  | q25.3  | -1.25 | 0       | influenza virus NS1A binding protein [Source:HGNC Symbol;Acc:HGNC:16951]                      |
| <i>PSTPIP1</i>       | 15 | q24.3  | -1.25 | 0.0027  | proline-serine-threonine phosphatase interacting protein 1 [Source:HGNC Symbol;Acc:HGNC:9580] |
| <i>PLK3</i>          | 1  | p34.1  | -1.24 | 0.00035 | polo-like kinase 3 [Source:HGNC Symbol;Acc:HGNC:2154]                                         |
| <i>DGUOK-AS1</i>     | 2  | p13.1  | -1.24 | 0.00156 | DGUOK antisense RNA 1 [Source:HGNC Symbol;Acc:HGNC:43441]                                     |
| <i>PLEK</i>          | 2  | p14    | -1.23 | 0       | pleckstrin [Source:HGNC Symbol;Acc:HGNC:9070]                                                 |
| <i>CYFIP2</i>        | 5  | q33.3  | -1.23 | 0.00001 | cytoplasmic FMR1 interacting protein 2 [Source:HGNC Symbol;Acc:HGNC:13760]                    |
| <i>LSP1</i>          | 6  | p21.33 | -1.23 | 0.00003 | leukocyte specific transcript 1 [Source:HGNC Symbol;Acc:HGNC:14189]                           |
| <i>MBOAT2</i>        | 2  | p25.1  | -1.23 | 0.00007 | membrane bound O-acyltransferase domain containing 2 [Source:HGNC Symbol;Acc:HGNC:25193]      |

|                  |    |        |       |         |                                                                                                            |
|------------------|----|--------|-------|---------|------------------------------------------------------------------------------------------------------------|
| <i>OR52K2</i>    | 11 | p15.4  | -1.23 | 0.0002  | olfactory receptor, family 52, subfamily K, member 2 [Source:HGNC Symbol;Acc:HGNC:15223]                   |
| <i>ANKRD22</i>   | 10 | q23.31 | -1.23 | 0.00185 | ankyrin repeat domain 22 [Source:HGNC Symbol;Acc:HGNC:28321]                                               |
| <i>CUEDC1</i>    | 17 | q22    | -1.23 | 0.00481 | CUE domain containing 1 [Source:HGNC Symbol;Acc:HGNC:31350]                                                |
| <i>PILRA</i>     | 7  | q22.1  | -1.22 | 0.0002  | paired immunoglobulin-like type 2 receptor alpha [Source:HGNC Symbol;Acc:HGNC:20396]                       |
| <i>IFI27L2</i>   | 14 | q32.12 | -1.22 | 0.00134 | interferon, alpha-inducible protein 27-like 2 [Source:HGNC Symbol;Acc:HGNC:19753]                          |
| <i>DLGAP5</i>    | 14 | q22.3  | -1.21 | 0.00068 | discs, large (Drosophila) homolog-associated protein 5 [Source:HGNC Symbol;Acc:HGNC:16864]                 |
| <i>LINC00877</i> | 3  | p13    | -1.20 | 0.00883 | long intergenic non-protein coding RNA 877 [Source:HGNC Symbol;Acc:HGNC:27706]                             |
| <i>TLR2</i>      | 4  | q31.3  | -1.19 | 0.00109 | toll-like receptor 2 [Source:HGNC Symbol;Acc:HGNC:11848]                                                   |
| <i>NPL</i>       | 1  | q25.3  | -1.19 | 0.0054  | N-acetylneuraminate pyruvate lyase (dihydrodipicolinate synthase) [Source:HGNC Symbol;Acc:HGNC:16781]      |
| <i>KIAA0513</i>  | 16 | q24.1  | -1.19 | 0.00687 | KIAA0513 [Source:HGNC Symbol;Acc:HGNC:29058]                                                               |
| <i>GLIPR1</i>    | 12 | q21.2  | -1.19 | 0.00933 | GLI pathogenesis-related 1 [Source:HGNC Symbol;Acc:HGNC:17001]                                             |
| <i>EPOR</i>      | 19 | p13.2  | -1.18 | 0.00019 | erythropoietin receptor [Source:HGNC Symbol;Acc:HGNC:3416]                                                 |
| <i>AK4</i>       | 1  | p31.3  | -1.18 | 0.00038 | adenylate kinase 4 [Source:HGNC Symbol;Acc:HGNC:363]                                                       |
| <i>EHD4</i>      | 15 | q15.1  | -1.18 | 0.00875 | EH-domain containing 4 [Source:HGNC Symbol;Acc:HGNC:3245]                                                  |
| <i>CSF1</i>      | 1  | p13.3  | -1.18 | 0.0091  | colony stimulating factor 1 (macrophage) [Source:HGNC Symbol;Acc:HGNC:2432]                                |
| <i>SAT1</i>      | X  | p22.11 | -1.17 | 0       | spermidine/spermine N1-acetyltransferase 1 [Source:HGNC Symbol;Acc:HGNC:10540]                             |
| <i>NLRP1</i>     | 17 | p13.2  | -1.17 | 0.00035 | NLR family, pyrin domain containing 1 [Source:HGNC Symbol;Acc:HGNC:14374]                                  |
| <i>SORL1</i>     | 11 | q24.1  | -1.17 | 0.00797 | sortilin-related receptor, L(DLR class) A repeats containing [Source:HGNC Symbol;Acc:HGNC:11185]           |
| <i>PPAP2A</i>    | 5  | q11.2  | -1.16 | 0.00214 | phosphatidic acid phosphatase type 2A [Source:HGNC Symbol;Acc:HGNC:9228]                                   |
| <i>AGFG1</i>     | 2  | q36.3  | -1.16 | 0.00914 | ArfGAP with FG repeats 1 [Source:HGNC Symbol;Acc:HGNC:5175]                                                |
| <i>KIAA0040</i>  | 1  | q25.1  | -1.15 | 0       | KIAA0040 [Source:HGNC Symbol;Acc:HGNC:28950]                                                               |
| <i>GLIPR2</i>    | 9  | p13.3  | -1.15 | 0.00004 | GLI pathogenesis-related 2 [Source:HGNC Symbol;Acc:HGNC:18007]                                             |
| <i>LINC00936</i> | 12 | q21.33 | -1.15 | 0.00028 | long intergenic non-protein coding RNA 936 [Source:HGNC Symbol;Acc:HGNC:27883]                             |
| <i>CP</i>        | 3  | q25.1  | -1.14 | 0.00399 | ceruloplasmin (ferroxidase) [Source:HGNC Symbol;Acc:HGNC:2295]                                             |
| <i>DUSP1</i>     | 5  | q35.1  | -1.13 | 0.00185 | dual specificity phosphatase 1 [Source:HGNC Symbol;Acc:HGNC:3064]                                          |
| <i>ATP1B2</i>    | 17 | p13.1  | -1.13 | 0.00781 | ATPase, Na <sup>+</sup> /K <sup>+</sup> transporting, beta 2 polypeptide [Source:HGNC Symbol;Acc:HGNC:805] |
| <i>ENTPD1</i>    | 10 | q24.1  | -1.12 | 0       | ectonucleoside triphosphate diphosphohydrolase 1 [Source:HGNC Symbol;Acc:HGNC:3363]                        |
| <i>OAT</i>       | 10 | q26.13 | -1.12 | 0       | ornithine aminotransferase [Source:HGNC Symbol;Acc:HGNC:8091]                                              |
| <i>TKT</i>       | 3  | p21.1  | -1.12 | 0.00017 | transketolase [Source:HGNC Symbol;Acc:HGNC:11834]                                                          |

|                        |    |        |       |         |                                                                                                                        |
|------------------------|----|--------|-------|---------|------------------------------------------------------------------------------------------------------------------------|
| <i>HIST1H2AL</i>       | 6  | p22.1  | -1.12 | 0.00221 | histone cluster 1, H2a [Source:HGNC Symbol;Acc:HGNC:4730]                                                              |
| <i>CTSD</i>            | 11 | p15.5  | -1.12 | 0.00778 | cathepsin D [Source:HGNC Symbol;Acc:HGNC:2529]                                                                         |
| <i>PIF1</i>            | 15 | q22.31 | -1.12 | 0.00797 | PIF1 5'-to-3' DNA helicase [Source:HGNC Symbol;Acc:HGNC:26220]                                                         |
| <i>RP11-1157N2_B.2</i> | 18 | p11.21 | -1.11 | 0       |                                                                                                                        |
| <i>TMEM170B</i>        | 6  | p24.2  | -1.11 | 0.00631 | transmembrane protein 170B [Source:HGNC Symbol;Acc:HGNC:34244]                                                         |
| <i>TMEM120A</i>        | 7  | q11.23 | -1.10 | 0       | transmembrane protein 120A [Source:HGNC Symbol;Acc:HGNC:21697]                                                         |
| <i>MEGF9</i>           | 9  | q33.2  | -1.10 | 0.00013 | multiple EGF-like-domains 9 [Source:HGNC Symbol;Acc:HGNC:3234]                                                         |
| <i>EAF1</i>            | 3  | p25.1  | -1.09 | 0.00002 | ELL associated factor 1 [Source:HGNC Symbol;Acc:HGNC:20907]                                                            |
| <i>HLA-F</i>           | 6  | p22.1  | -1.09 | 0.00009 | major histocompatibility complex, class I, F [Source:HGNC Symbol;Acc:HGNC:4963]                                        |
| <i>PITPNM1</i>         | 11 | q13.2  | -1.09 | 0.00016 | phosphatidylinositol transfer protein, membrane-associated 1 [Source:HGNC Symbol;Acc:HGNC:9003]                        |
| <i>BST1</i>            | 4  | p15.32 | -1.09 | 0.00019 | bone marrow stromal cell antigen 1 [Source:HGNC Symbol;Acc:HGNC:1118]                                                  |
| <i>EHD1</i>            | 11 | q13.1  | -1.09 | 0.0082  | EH-domain containing 1 [Source:HGNC Symbol;Acc:HGNC:3242]                                                              |
| <i>AC074289.1</i>      | 2  | p14    | -1.08 | 0.00012 |                                                                                                                        |
| <i>CD300LF</i>         | 17 | q25.1  | -1.08 | 0.00228 | CD300 molecule-like family member f [Source:HGNC Symbol;Acc:HGNC:29883]                                                |
| <i>RP3-426I6.5</i>     | 1  | p35.3  | -1.07 | 0.0001  |                                                                                                                        |
| <i>TMEM71</i>          | 8  | q24.22 | -1.07 | 0.00281 | transmembrane protein 71 [Source:HGNC Symbol;Acc:HGNC:26572]                                                           |
| <i>CCDC69</i>          | 5  | q33.1  | -1.06 | 0.00117 | coiled-coil domain containing 69 [Source:HGNC Symbol;Acc:HGNC:24487]                                                   |
| <i>TICAM1</i>          | 19 | p13.3  | -1.05 | 0.00469 | toll-like receptor adaptor molecule 1 [Source:HGNC Symbol;Acc:HGNC:18348]                                              |
| <i>NFKBIA</i>          | 14 | q13.2  | -1.04 | 0.00019 | nuclear factor of kappa light polypeptide gene enhancer in B-cells inhibitor, alpha [Source:HGNC Symbol;Acc:HGNC:7797] |
| <i>RP11-542M13.3</i>   | 16 | q24.1  | -1.04 | 0.00185 |                                                                                                                        |
| <i>TMEM255B</i>        | 13 | q34    | -1.04 | 0.00847 | transmembrane protein 255B [Source:HGNC Symbol;Acc:HGNC:28297]                                                         |
| <i>RP11-568J23.4</i>   | 16 | q24.1  | -1.03 | 0.00017 |                                                                                                                        |
| <i>HIST1H2AI</i>       | 6  | p22.1  | -1.03 | 0.00091 | histone cluster 1, H2ai [Source:HGNC Symbol;Acc:HGNC:4725]                                                             |
| <i>ANXA6</i>           | 5  | q33.1  | -1.03 | 0.00311 | annexin A6 [Source:HGNC Symbol;Acc:HGNC:544]                                                                           |
| <i>RP3-453C12.14</i>   | 20 | q13.12 | -1.02 | 0.00541 |                                                                                                                        |
| <i>C9orf72</i>         | 9  | p21.2  | -1.01 | 0       | chromosome 9 open reading frame 72 [Source:HGNC Symbol;Acc:HGNC:28337]                                                 |
| <i>CTD-2540B15.13</i>  | 19 | q13.11 | -1.01 | 0.00228 |                                                                                                                        |
| <i>C10orf54</i>        | 10 | q22.1  | -1.01 | 0.00437 | chromosome 10 open reading frame 54 [Source:HGNC Symbol;Acc:HGNC:30085]                                                |
| <i>STEAP4</i>          | 7  | q21.12 | -1.01 | 0.00556 | STEAP family member 4 [Source:HGNC Symbol;Acc:HGNC:21923]                                                              |

|                     |    |        |       |         |                                                                                                                                   |
|---------------------|----|--------|-------|---------|-----------------------------------------------------------------------------------------------------------------------------------|
| <i>FOSB</i>         | 19 | q13.32 | -1.01 | 0.00604 | FBJ murine osteosarcoma viral oncogene homolog B [Source:HGNC Symbol;Acc:HGNC:3797]                                               |
| <i>RP11-65J3.1</i>  | 9  | q34.11 | -1.01 | 0.00851 |                                                                                                                                   |
| <i>RP11-629O1.2</i> | 8  | q24.22 | -0.99 | 0.00012 |                                                                                                                                   |
| <i>PC</i>           | 11 | q13.2  | -0.99 | 0.00099 | pyruvate carboxylase [Source:HGNC Symbol;Acc:HGNC:8636]                                                                           |
| <i>ESPL1</i>        | 12 | q13.13 | -0.99 | 0.00255 | extra spindle pole bodies homolog 1 ( <i>S. cerevisiae</i> ) [Source:HGNC Symbol;Acc:HGNC:16856]                                  |
| <i>MGAT3</i>        | 22 | q13.1  | -0.99 | 0.00983 | mannosyl (beta-1,4-)-glycoprotein beta-1,4-N-acetylglucosaminyltransferase [Source:HGNC Symbol;Acc:HGNC:7046]                     |
| <i>KLF6</i>         | 10 | p15.2  | -0.98 | 0.00091 | Kruppel-like factor 6 [Source:HGNC Symbol;Acc:HGNC:2235]                                                                          |
| <i>S100A6</i>       | 1  | q21.3  | -0.98 | 0.00103 | S100 calcium binding protein A6 [Source:HGNC Symbol;Acc:HGNC:10496]                                                               |
| <i>EPHB2</i>        | 1  | p36.12 | -0.98 | 0.00106 | EPH receptor B2 [Source:HGNC Symbol;Acc:HGNC:3393]                                                                                |
| <i>RIPK2</i>        | 8  | q21.3  | -0.98 | 0.00175 | receptor-interacting serine-threonine kinase 2 [Source:HGNC Symbol;Acc:HGNC:10020]                                                |
| <i>PSAP</i>         | 10 | q22.1  | -0.98 | 0.00228 | prosaposin [Source:HGNC Symbol;Acc:HGNC:9498]                                                                                     |
| <i>NLRP3</i>        | 1  | q44    | -0.98 | 0.0091  | NLR family, pyrin domain containing 3 [Source:HGNC Symbol;Acc:HGNC:16400]                                                         |
| <i>NPC2</i>         | 14 | q24.3  | -0.97 | 0       | Niemann-Pick disease, type C2 [Source:HGNC Symbol;Acc:HGNC:14537]                                                                 |
| <i>ITGB2</i>        | 21 | q22.3  | -0.97 | 0       | integrin, beta 2 (complement component 3 receptor 3 and 4 subunit) [Source:HGNC Symbol;Acc:HGNC:6155]                             |
| <i>VIM-AS1</i>      | 10 | p13    | -0.97 | 0.00156 | VIM antisense RNA 1 [Source:HGNC Symbol;Acc:HGNC:44879]                                                                           |
| <i>BTG1</i>         | 12 | q21.33 | -0.97 | 0.00309 | B-cell translocation gene 1, anti-proliferative [Source:HGNC Symbol;Acc:HGNC:1130]                                                |
| <i>UBXN11</i>       | 1  | p36.11 | -0.96 | 0       | UBX domain protein 11 [Source:HGNC Symbol;Acc:HGNC:30600]                                                                         |
| <i>MALAT1</i>       | 11 | q13.1  | -0.96 | 0.00025 | metastasis associated lung adenocarcinoma transcript 1 (non-protein coding) [Source:HGNC Symbol;Acc:HGNC:29665]                   |
| <i>CEACAM1</i>      | 19 | q13.2  | -0.96 | 0.00622 | carcinoembryonic antigen-related cell adhesion molecule 1 (biliary glycoprotein) [Source:HGNC Symbol;Acc:HGNC:1814]               |
| <i>ADORA2A-AS1</i>  | 22 | q11.23 | -0.94 | 0.00179 | ADORA2A antisense RNA 1 [Source:HGNC Symbol;Acc:HGNC:37122]                                                                       |
| <i>HCAR2</i>        | 12 | q24.31 | -0.94 | 0.00199 | hydroxycarboxylic acid receptor 2 [Source:HGNC Symbol;Acc:HGNC:24827]                                                             |
| <i>PXYLP1</i>       | 3  | q23    | -0.94 | 0.00473 | 2-phosphoxylose phosphatase 1 [Source:HGNC Symbol;Acc:HGNC:26303]                                                                 |
| <i>GLUL</i>         | 1  | q25.3  | -0.93 | 0.00078 | glutamate-ammonia ligase [Source:HGNC Symbol;Acc:HGNC:4341]                                                                       |
| <i>NRGN</i>         | 11 | q24.2  | -0.93 | 0.0023  | neurogranin (protein kinase C substrate, RC3) [Source:HGNC Symbol;Acc:HGNC:8000]                                                  |
| <i>ZFP36</i>        | 19 | q13.2  | -0.93 | 0.00851 | ZFP36 ring finger protein [Source:HGNC Symbol;Acc:HGNC:12862]                                                                     |
| <i>SLC9A3R1</i>     | 17 | q25.1  | -0.92 | 0.00001 | solute carrier family 9, subfamily A (NHE3, cation proton antiporter 3), member 3 regulator 1 [Source:HGNC Symbol;Acc:HGNC:11075] |
| <i>GNS</i>          | 12 | q14.3  | -0.92 | 0.00007 | glucosamine (N-acetyl)-6-sulfatase [Source:HGNC Symbol;Acc:HGNC:4422]                                                             |

|                      |    |        |       |         |                                                                                                                        |
|----------------------|----|--------|-------|---------|------------------------------------------------------------------------------------------------------------------------|
| <i>RP11-670E13.6</i> | 17 | q22    | -0.92 | 0.00111 |                                                                                                                        |
| <i>BRI3</i>          | 7  | q21.3  | -0.92 | 0.00157 | brain protein I3 [Source:HGNC Symbol;Acc:HGNC:1109]                                                                    |
| <i>SCPEP1</i>        | 17 | q22    | -0.92 | 0.00883 | serine carboxypeptidase 1 [Source:HGNC Symbol;Acc:HGNC:29507]                                                          |
| <i>ASAP1</i>         | 8  | q24.22 | -0.91 | 0.00003 | ArfGAP with SH3 domain, ankyrin repeat and PH domain 1 [Source:HGNC Symbol;Acc:HGNC:2720]                              |
| <i>LINC00671</i>     | 17 | q21.31 | -0.91 | 0.00233 | long intergenic non-protein coding RNA 671 [Source:HGNC Symbol;Acc:HGNC:44339]                                         |
| <i>DOK3</i>          | 5  | q35.3  | -0.91 | 0.00714 | docking protein 3 [Source:HGNC Symbol;Acc:HGNC:24583]                                                                  |
| <i>FTH1</i>          | 11 | q12.3  | -0.91 | 0.00755 | ferritin, heavy polypeptide 1 [Source:HGNC Symbol;Acc:HGNC:3976]                                                       |
| <i>S100A4</i>        | 1  | q21.3  | -0.90 | 0       | S100 calcium binding protein A4 [Source:HGNC Symbol;Acc:HGNC:10494]                                                    |
| <i>AC116035.1</i>    | 3  | p24.1  | -0.90 | 0.00066 |                                                                                                                        |
| <i>DHX34</i>         | 19 | q13.32 | -0.90 | 0.00255 | DEAH (Asp-Glu-Ala-His) box polypeptide 34 [Source:HGNC Symbol;Acc:HGNC:16719]                                          |
| <i>DEPDC1B</i>       | 5  | q12.1  | -0.90 | 0.00681 | DEP domain containing 1B [Source:HGNC Symbol;Acc:HGNC:24902]                                                           |
| <i>TMIGD2</i>        | 19 | p13.3  | -0.90 | 0.00932 | transmembrane and immunoglobulin domain containing 2 [Source:HGNC Symbol;Acc:HGNC:28324]                               |
| <i>MBD2</i>          | 18 | q21.2  | -0.89 | 0       | methyl-CpG binding domain protein 2 [Source:HGNC Symbol;Acc:HGNC:6917]                                                 |
| <i>CD2</i>           | 1  | p13.1  | -0.89 | 0.00125 | CD2 molecule [Source:HGNC Symbol;Acc:HGNC:1639]                                                                        |
| <i>SNX22</i>         | 15 | q22.31 | -0.88 | 0.0002  | sorting nexin 22 [Source:HGNC Symbol;Acc:HGNC:16315]                                                                   |
| <i>AGTRAP</i>        | 1  | p36.22 | -0.88 | 0.00098 | angiotensin II receptor-associated protein [Source:HGNC Symbol;Acc:HGNC:13539]                                         |
| <i>NFKBIZ</i>        | 3  | q12.3  | -0.88 | 0.00257 | nuclear factor of kappa light polypeptide gene enhancer in B-cells inhibitor, zeta [Source:HGNC Symbol;Acc:HGNC:29805] |
| <i>TAGAP</i>         | 6  | q25.3  | -0.88 | 0.00987 | T-cell activation RhoGTPase activating protein [Source:HGNC Symbol;Acc:HGNC:15669]                                     |
| <i>TRIB1</i>         | 8  | q24.13 | -0.87 | 0.0003  | tribbles pseudokinase 1 [Source:HGNC Symbol;Acc:HGNC:16891]                                                            |
| <i>CTD-3252C9.4</i>  | 19 | p13.12 | -0.87 | 0.00118 |                                                                                                                        |
| <i>DDIT3</i>         | 12 | q13.3  | -0.87 | 0.00458 | DNA-damage-inducible transcript 3 [Source:HGNC Symbol;Acc:HGNC:2726]                                                   |
| <i>H1FX</i>          | 3  | q21.3  | -0.86 | 0       | H1 histone family, member X [Source:HGNC Symbol;Acc:HGNC:4722]                                                         |
| <i>LST1</i>          | 12 | q23.1  | -0.86 | 0.00003 | leukotriene A4 hydrolase [Source:HGNC Symbol;Acc:HGNC:6710]                                                            |
| <i>HK2</i>           | 2  | p12    | -0.86 | 0.00008 | hexokinase 2 [Source:HGNC Symbol;Acc:HGNC:4923]                                                                        |
| <i>HK1</i>           | 10 | q22.1  | -0.86 | 0.00048 | hexokinase 1 [Source:HGNC Symbol;Acc:HGNC:4922]                                                                        |
| <i>ATP6V1B2</i>      | 8  | p21.3  | -0.85 | 0.00019 | ATPase, H <sup>+</sup> transporting, lysosomal 56/58kDa, V1 subunit B2 [Source:HGNC Symbol;Acc:HGNC:854]               |
| <i>JUNB</i>          | 19 | p13.13 | -0.85 | 0.00085 | jun B proto-oncogene [Source:HGNC Symbol;Acc:HGNC:6205]                                                                |
| <i>GLRX</i>          | 5  | q15    | -0.85 | 0.00393 | glutaredoxin (thioltransferase) [Source:HGNC Symbol;Acc:HGNC:4330]                                                     |
| <i>GABARAPL1</i>     | 12 | p13.2  | -0.85 | 0.00599 | GABA(A) receptor-associated protein like 1 [Source:HGNC Symbol;Acc:HGNC:4068]                                          |



|                      |    |        |       |         |                                                                                                                          |
|----------------------|----|--------|-------|---------|--------------------------------------------------------------------------------------------------------------------------|
| <i>MESDC1</i>        | 15 | q25.1  | -0.85 | 0.00654 | mesoderm development candidate 1 [Source:HGNC Symbol;Acc:HGNC:13519]                                                     |
| <i>CD55</i>          | 1  | q32.2  | -0.85 | 0.00797 | CD55 molecule, decay accelerating factor for complement (Cromer blood group) [Source:HGNC Symbol;Acc:HGNC:2665]          |
| <i>PTTG1</i>         | 5  | q33.3  | -0.84 | 0.00077 | pituitary tumor-transforming 1 [Source:HGNC Symbol;Acc:HGNC:9690]                                                        |
| <i>RP3-402G11.26</i> | 22 | q13.33 | -0.84 | 0.0096  |                                                                                                                          |
| <i>NAAA</i>          | 4  | q21.1  | -0.83 | 0.00017 | N-acylethanolamine acid amidase [Source:HGNC Symbol;Acc:HGNC:736]                                                        |
| <i>FOSL2</i>         | 2  | p23.2  | -0.83 | 0.00309 | FOS-like antigen 2 [Source:HGNC Symbol;Acc:HGNC:3798]                                                                    |
| <i>FTL</i>           | 19 | q13.33 | -0.83 | 0.00347 | ferritin, light polypeptide [Source:HGNC Symbol;Acc:HGNC:3999]                                                           |
| <i>HIST1H1C</i>      | 6  | p22.2  | -0.83 | 0.00702 | histone cluster 1, H1c [Source:HGNC Symbol;Acc:HGNC:4716]                                                                |
| <i>NETO2</i>         | 16 | q12.1  | -0.83 | 0.00705 | neuropilin (NRP) and tolloid (TLL)-like 2 [Source:HGNC Symbol;Acc:HGNC:14644]                                            |
| <i>MCL1</i>          | 1  | q21.2  | -0.82 | 0.00036 | myeloid cell leukemia 1 [Source:HGNC Symbol;Acc:HGNC:6943]                                                               |
| <i>BTN2A2</i>        | 6  | p22.2  | -0.82 | 0.00961 | butyrophilin, subfamily 2, member A2 [Source:HGNC Symbol;Acc:HGNC:1137]                                                  |
| <i>SCARNA9</i>       | 11 | q21    | -0.81 | 0.00008 | small Cajal body-specific RNA 9 [Source:HGNC Symbol;Acc:HGNC:32566]                                                      |
| <i>FAM45A</i>        | 10 | q26.11 | -0.81 | 0.00051 | family with sequence similarity 45, member A [Source:HGNC Symbol;Acc:HGNC:31793]                                         |
| <i>GLTP</i>          | 12 | q24.11 | -0.81 | 0.00179 | glycolipid transfer protein [Source:HGNC Symbol;Acc:HGNC:24867]                                                          |
| <i>CLEC1A</i>        | 12 | p13.2  | -0.81 | 0.00604 | C-type lectin domain family 1, member A [Source:HGNC Symbol;Acc:HGNC:24355]                                              |
| <i>ZNF438</i>        | 10 | p11.23 | -0.81 | 0.00828 | zinc finger protein 438 [Source:HGNC Symbol;Acc:HGNC:21029]                                                              |
| <i>CTSB</i>          | 8  | p23.1  | -0.81 | 0.00874 | cathepsin B [Source:HGNC Symbol;Acc:HGNC:2527]                                                                           |
| <i>AMPD2</i>         | 1  | p13.3  | -0.80 | 0.00003 | adenosine monophosphate deaminase 2 [Source:HGNC Symbol;Acc:HGNC:469]                                                    |
| <i>KIF21B</i>        | 1  | q32.1  | -0.80 | 0.00375 | kinesin family member 21B [Source:HGNC Symbol;Acc:HGNC:29442]                                                            |
| <i>FKBP15</i>        | 9  | q32    | -0.80 | 0.00923 | FK506 binding protein 15, 133kDa [Source:HGNC Symbol;Acc:HGNC:23397]                                                     |
| <i>FBXL5</i>         | 4  | p15.32 | -0.79 | 0       | F-box and leucine-rich repeat protein 5 [Source:HGNC Symbol;Acc:HGNC:13602]                                              |
| <i>LYAR</i>          | 11 | p15.4  | -0.79 | 0.00536 | lymphatic vessel endothelial hyaluronan receptor 1 [Source:HGNC Symbol;Acc:HGNC:14687]                                   |
| <i>C20orf24</i>      | 20 | q11.23 | -0.78 | 0       | chromosome 20 open reading frame 24 [Source:HGNC Symbol;Acc:HGNC:15870]                                                  |
| <i>TREX1</i>         | 3  | p21.31 | -0.78 | 0.00388 | three prime repair exonuclease 1 [Source:HGNC Symbol;Acc:HGNC:12269]                                                     |
| <i>CARD16</i>        | 11 | q22.3  | -0.78 | 0.00755 | caspase recruitment domain family, member 16 [Source:HGNC Symbol;Acc:HGNC:33701]                                         |
| <i>ABHD5</i>         | 3  | p21.33 | -0.77 | 0.00048 | abhydrolase domain containing 5 [Source:HGNC Symbol;Acc:HGNC:21396]                                                      |
| <i>PTGS1</i>         | 9  | q33.2  | -0.77 | 0.00086 | prostaglandin-endoperoxide synthase 1 (prostaglandin G/H synthase and cyclooxygenase) [Source:HGNC Symbol;Acc:HGNC:9604] |
| <i>SHKBP1</i>        | 19 | q13.2  | -0.77 | 0.00266 | SH3KBP1 binding protein 1 [Source:HGNC Symbol;Acc:HGNC:19214]                                                            |
| <i>PECAM1</i>        | 17 | q23.3  | -0.77 | 0.00348 | platelet/endothelial cell adhesion molecule 1 [Source:HGNC Symbol;Acc:HGNC:8823]                                         |

|                       |    |        |       |         |                                                                                                                                                      |
|-----------------------|----|--------|-------|---------|------------------------------------------------------------------------------------------------------------------------------------------------------|
| <i>PSMB9</i>          | 6  | p21.32 | -0.77 | 0.00464 | proteasome (prosome, macropain) subunit, beta type, 9 [Source:HGNC Symbol;Acc:HGNC:9546]                                                             |
| <i>HMGB2</i>          | 4  | q34.1  | -0.77 | 0.00609 | high mobility group box 2 [Source:HGNC Symbol;Acc:HGNC:5000]                                                                                         |
| <i>FYB</i>            | 5  | p13.1  | -0.77 | 0.00897 | FYN binding protein [Source:HGNC Symbol;Acc:HGNC:4036]                                                                                               |
| <i>DUSP2</i>          | 2  | q11.2  | -0.76 | 0       | dual specificity phosphatase 2 [Source:HGNC Symbol;Acc:HGNC:3068]                                                                                    |
| <i>RP11-802E16.3</i>  | 11 | q13.2  | -0.76 | 0.00008 |                                                                                                                                                      |
| <i>LIME1</i>          | 20 | q13.33 | -0.76 | 0.00042 | Lck interacting transmembrane adaptor 1 [Source:HGNC Symbol;Acc:HGNC:26016]                                                                          |
| <i>CORO1A</i>         | 16 | p11.2  | -0.76 | 0.0007  | coronin, actin binding protein, 1A [Source:HGNC Symbol;Acc:HGNC:2252]                                                                                |
| <i>SBF2</i>           | 11 | p15.4  | -0.76 | 0.00685 | SET binding factor 2 [Source:HGNC Symbol;Acc:HGNC:2135]                                                                                              |
| <i>POR</i>            | 7  | q11.23 | -0.75 | 0.00462 | P450 (cytochrome) oxidoreductase [Source:HGNC Symbol;Acc:HGNC:9208]                                                                                  |
| <i>TCIRG1</i>         | 11 | q13.2  | -0.74 | 0.00027 | T-cell, immune regulator 1, ATPase, H+ transporting, lysosomal V0 subunit A3 [Source:HGNC Symbol;Acc:HGNC:11647]                                     |
| <i>NLRC5</i>          | 16 | q13    | -0.74 | 0.00691 | NLR family, CARD domain containing 5 [Source:HGNC Symbol;Acc:HGNC:29933]                                                                             |
| <i>P2RX4</i>          | 12 | q24.31 | -0.74 | 0.00986 | purinergic receptor P2X, ligand-gated ion channel, 4 [Source:HGNC Symbol;Acc:HGNC:8535]                                                              |
| <i>TMEM256-PLSCR3</i> | 17 | p13.1  | -0.73 | 0.00077 | TMEM256-PLSCR3 readthrough (NMD candidate) [Source:HGNC Symbol;Acc:HGNC:49186]                                                                       |
| <i>IL6R</i>           | 1  | q21.3  | -0.73 | 0.00796 | interleukin 6 receptor [Source:HGNC Symbol;Acc:HGNC:6019]                                                                                            |
| <i>RAB24</i>          | 5  | q35.3  | -0.72 | 0       | RAB24, member RAS oncogene family [Source:HGNC Symbol;Acc:HGNC:9765]                                                                                 |
| <i>SLC36A1</i>        | 5  | q33.1  | -0.72 | 0.00155 | solute carrier family 36 (proton/amino acid symporter), member 1 [Source:HGNC Symbol;Acc:HGNC:18761]                                                 |
| <i>DEF8</i>           | 16 | q24.3  | -0.71 | 0.00076 | differentially expressed in FDCP 8 homolog (mouse) [Source:HGNC Symbol;Acc:HGNC:25969]                                                               |
| <i>CLCN5</i>          | X  | p11.23 | -0.71 | 0.00315 | chloride channel, voltage-sensitive 5 [Source:HGNC Symbol;Acc:HGNC:2023]                                                                             |
| <i>C1orf162</i>       | 1  | p13.2  | -0.71 | 0.00328 | chromosome 1 open reading frame 162 [Source:HGNC Symbol;Acc:HGNC:28344]                                                                              |
| <i>JDP2</i>           | 14 | q24.3  | -0.71 | 0.00727 | Jun dimerization protein 2 [Source:HGNC Symbol;Acc:HGNC:17546]                                                                                       |
| <i>TSPO</i>           | 22 | q13.2  | -0.71 | 0.00892 | translocator protein (18kDa) [Source:HGNC Symbol;Acc:HGNC:1158]                                                                                      |
| <i>EVI2B</i>          | 17 | q11.2  | -0.70 | 0       | ecotropic viral integration site 2B [Source:HGNC Symbol;Acc:HGNC:3500]                                                                               |
| <i>C14orf80</i>       | 14 | q32.33 | -0.70 | 0.00185 | chromosome 14 open reading frame 80 [Source:HGNC Symbol;Acc:HGNC:20127]                                                                              |
| <i>DGKA</i>           | 12 | q13.2  | -0.70 | 0.00713 | diacylglycerol kinase, alpha 80kDa [Source:HGNC Symbol;Acc:HGNC:2849]                                                                                |
| <i>C6orf1</i>         | 6  | p21.31 | -0.69 | 0.00029 | chromosome 6 open reading frame 1 [Source:HGNC Symbol;Acc:HGNC:1340]                                                                                 |
| <i>MXD3</i>           | 5  | q35.3  | -0.69 | 0.00079 | MAX dimerization protein 3 [Source:HGNC Symbol;Acc:HGNC:14008]                                                                                       |
| <i>RPS6KA1</i>        | 1  | p36.11 | -0.69 | 0.00628 | ribosomal protein S6 kinase, 90kDa, polypeptide 1 [Source:HGNC Symbol;Acc:HGNC:10430]                                                                |
| <i>SEMA4A</i>         | 1  | q22    | -0.69 | 0.0077  | sema domain, immunoglobulin domain (Ig), transmembrane domain (TM) and short cytoplasmic domain, (semaphorin) 4A [Source:HGNC Symbol;Acc:HGNC:10729] |

|                      |    |        |       |         |                                                                                                        |
|----------------------|----|--------|-------|---------|--------------------------------------------------------------------------------------------------------|
| <i>SHROOM1</i>       | 5  | q31.1  | -0.69 | 0.00962 | shroom family member 1 [Source:HGNC Symbol;Acc:HGNC:24084]                                             |
| <i>SELK</i>          | 3  | p21.1  | -0.68 | 0.00001 | selenoprotein K [Source:RefSeq peptide;Acc:NP_067060]                                                  |
| <i>TMEM167A</i>      | 5  | q14.2  | -0.68 | 0.00026 | transmembrane protein 167A [Source:HGNC Symbol;Acc:HGNC:28330]                                         |
| <i>SEC14L4</i>       | 22 | q12.2  | -0.68 | 0.00294 | SEC14-like 4 ( <i>S. cerevisiae</i> ) [Source:HGNC Symbol;Acc:HGNC:20627]                              |
| <i>HLA-C</i>         | 6  | p21.33 | -0.68 | 0.00847 | major histocompatibility complex, class I, C [Source:HGNC Symbol;Acc:HGNC:4933]                        |
| <i>ZNF281</i>        | 1  | q32.1  | -0.67 | 0.00098 | zinc finger protein 281 [Source:HGNC Symbol;Acc:HGNC:13075]                                            |
| <i>SNX27</i>         | 1  | q21.3  | -0.67 | 0.00266 | sorting nexin family member 27 [Source:HGNC Symbol;Acc:HGNC:20073]                                     |
| <i>POLE4</i>         | 2  | p12    | -0.67 | 0.00369 | polymerase (DNA-directed), epsilon 4, accessory subunit [Source:HGNC Symbol;Acc:HGNC:18755]            |
| <i>RP11-375N15.2</i> | 8  | p23.1  | -0.67 | 0.00779 |                                                                                                        |
| <i>MXD1</i>          | 2  | p13.3  | -0.66 | 0.00609 | MAX dimerization protein 1 [Source:HGNC Symbol;Acc:HGNC:6761]                                          |
| <i>AP3S1</i>         | 5  | q22.3  | -0.66 | 0.00666 | adaptor-related protein complex 3, sigma 1 subunit [Source:HGNC Symbol;Acc:HGNC:2013]                  |
| <i>FLT4</i>          | 5  | q35.3  | -0.66 | 0.00683 | fms-related tyrosine kinase 4 [Source:HGNC Symbol;Acc:HGNC:3767]                                       |
| <i>TBC1D7</i>        | 6  | p24.1  | -0.65 | 0.00406 | TBC1 domain family, member 7 [Source:HGNC Symbol;Acc:HGNC:21066]                                       |
| <i>KIF13B</i>        | 8  | p12    | -0.64 | 0.0006  | kinesin family member 13B [Source:HGNC Symbol;Acc:HGNC:14405]                                          |
| <i>FCHO1</i>         | 19 | p13.11 | -0.64 | 0.00102 | FCH domain only 1 [Source:HGNC Symbol;Acc:HGNC:29002]                                                  |
| <i>MTRNR2L9</i>      | 6  | q11.1  | -0.64 | 0.00233 | MT-RNR2-like 9 (pseudogene) [Source:HGNC Symbol;Acc:HGNC:37166]                                        |
| <i>TMSB4X</i>        | X  | p22.2  | -0.63 | 0.00377 | thymosin beta 4, X-linked [Source:HGNC Symbol;Acc:HGNC:11881]                                          |
| <i>GK5</i>           | 3  | q23    | -0.63 | 0.00433 | glycerol kinase 5 (putative) [Source:HGNC Symbol;Acc:HGNC:28635]                                       |
| <i>B2M</i>           | 15 | q21.1  | -0.62 | 0       | beta-2-microglobulin [Source:HGNC Symbol;Acc:HGNC:914]                                                 |
| <i>LRRN2</i>         | 11 | p15.5  | -0.62 | 0.00413 | lymphocyte-specific protein 1 [Source:HGNC Symbol;Acc:HGNC:6707]                                       |
| <i>LPPR2</i>         | 19 | p13.2  | -0.62 | 0.00453 | Lipid phosphate phosphatase-related protein type 2 [Source:UniProtKB/Swiss-Prot;Acc:Q96GM1]            |
| <i>AC135048.13</i>   | 16 | p11.2  | -0.62 | 0.0063  |                                                                                                        |
| <i>MTRNR2L1</i>      | 17 | p11.2  | -0.62 | 0.00679 | MT-RNR2-like 1 [Source:HGNC Symbol;Acc:HGNC:37155]                                                     |
| <i>STK10</i>         | 5  | q35.1  | -0.62 | 0.00758 | serine/threonine kinase 10 [Source:HGNC Symbol;Acc:HGNC:11388]                                         |
| <i>PLAGL2</i>        | 20 | q11.21 | -0.62 | 0.00897 | pleiomorphic adenoma gene-like 2 [Source:HGNC Symbol;Acc:HGNC:9047]                                    |
| <i>ADCY7</i>         | 16 | q12.1  | -0.61 | 0.00556 | adenylate cyclase 7 [Source:HGNC Symbol;Acc:HGNC:238]                                                  |
| <i>LINC00115</i>     | 1  | p36.33 | -0.59 | 0.00761 | long intergenic non-protein coding RNA 115 [Source:HGNC Symbol;Acc:HGNC:26211]                         |
| <i>ATP6AP2</i>       | X  | p11.4  | -0.58 | 0.00007 | ATPase, H <sup>+</sup> transporting, lysosomal accessory protein 2 [Source:HGNC Symbol;Acc:HGNC:18305] |
| <i>EIF1</i>          | 17 | q21.2  | -0.58 | 0.00288 | eukaryotic translation initiation factor 1 [Source:HGNC Symbol;Acc:HGNC:3249]                          |
| <i>GABARAP</i>       | 17 | p13.1  | -0.58 | 0.00298 | GABA(A) receptor-associated protein [Source:HGNC Symbol;Acc:HGNC:4067]                                 |

|                    |    |        |       |         |                                                                                                                      |
|--------------------|----|--------|-------|---------|----------------------------------------------------------------------------------------------------------------------|
| <i>ZFAND5</i>      | 9  | q21.13 | -0.58 | 0.00609 | zinc finger, AN1-type domain 5 [Source:HGNC Symbol;Acc:HGNC:13008]                                                   |
| <i>GADD45A</i>     | 1  | p31.3  | -0.57 | 0.00012 | growth arrest and DNA-damage-inducible, alpha [Source:HGNC Symbol;Acc:HGNC:4095]                                     |
| <i>RNF130</i>      | 5  | q35.3  | -0.57 | 0.00025 | ring finger protein 130 [Source:HGNC Symbol;Acc:HGNC:18280]                                                          |
| <i>PFKM</i>        | 12 | q13.11 | -0.57 | 0.00259 | phosphofructokinase, muscle [Source:HGNC Symbol;Acc:HGNC:8877]                                                       |
| <i>DENND1A</i>     | 9  | q33.3  | -0.56 | 0.00208 | DENN/MADD domain containing 1A [Source:HGNC Symbol;Acc:HGNC:29324]                                                   |
| <i>SMS</i>         | X  | p22.11 | -0.55 | 0.00379 | spermine synthase [Source:HGNC Symbol;Acc:HGNC:11123]                                                                |
| <i>TIFA</i>        | 4  | q25    | -0.54 | 0.00027 | TRAF-interacting protein with forkhead-associated domain [Source:HGNC Symbol;Acc:HGNC:19075]                         |
| <i>MSL3</i>        | X  | p22.2  | -0.52 | 0.00266 | male-specific lethal 3 homolog (Drosophila) [Source:HGNC Symbol;Acc:HGNC:7370]                                       |
| <i>RP11-51J9.5</i> | 8  | p12    | -0.52 | 0.0053  |                                                                                                                      |
| <i>ARHGAP27</i>    | 17 | q21.31 | -0.52 | 0.00596 | Rho GTPase activating protein 27 [Source:HGNC Symbol;Acc:HGNC:31813]                                                 |
| <i>LDHA</i>        | 11 | p15.1  | -0.51 | 0.00076 | lactate dehydrogenase A [Source:HGNC Symbol;Acc:HGNC:6535]                                                           |
| <i>NDUFA2</i>      | 5  | q31.3  | -0.51 | 0.00447 | NADH dehydrogenase (ubiquinone) 1 alpha subcomplex, 2, 8kDa [Source:HGNC Symbol;Acc:HGNC:7685]                       |
| <i>SLC26A6</i>     | 3  | p21.31 | -0.51 | 0.00686 | solute carrier family 26 (anion exchanger), member 6 [Source:HGNC Symbol;Acc:HGNC:14472]                             |
| <i>LAMTOR5</i>     | 1  | p13.3  | -0.50 | 0.00017 | late endosomal/lysosomal adaptor, MAPK and MTOR activator 5 [Source:HGNC Symbol;Acc:HGNC:17955]                      |
| <i>MANF</i>        | 3  | p21.2  | -0.50 | 0.00406 | mesencephalic astrocyte-derived neurotrophic factor [Source:HGNC Symbol;Acc:HGNC:15461]                              |
| <i>RAP1A</i>       | 1  | p13.2  | -0.50 | 0.00718 | RAP1A, member of RAS oncogene family [Source:HGNC Symbol;Acc:HGNC:9855]                                              |
| <i>OAZ1</i>        | 19 | p13.3  | -0.49 | 0.00401 | ornithine decarboxylase antizyme 1 [Source:HGNC Symbol;Acc:HGNC:8095]                                                |
| <i>UBQLN2</i>      | X  | p11.21 | -0.48 | 0.00183 | ubiquilin 2 [Source:HGNC Symbol;Acc:HGNC:12509]                                                                      |
| <i>CAPZB</i>       | 1  | p36.13 | -0.48 | 0.00797 | capping protein (actin filament) muscle Z-line, beta [Source:HGNC Symbol;Acc:HGNC:1491]                              |
| <i>ATP1B3</i>      | 3  | q23    | -0.48 | 0.00876 | ATPase, Na <sup>+</sup> /K <sup>+</sup> transporting, beta 3 polypeptide [Source:HGNC Symbol;Acc:HGNC:806]           |
| <i>MIIP</i>        | 1  | p36.22 | -0.46 | 0.00437 | migration and invasion inhibitory protein [Source:HGNC Symbol;Acc:HGNC:25715]                                        |
| <i>PSMA2</i>       | 7  | p14.1  | -0.43 | 0.00016 | proteasome (prosome, macropain) subunit, alpha type, 2 [Source:HGNC Symbol;Acc:HGNC:9531]                            |
| <i>COMMD9</i>      | 11 | p13    | -0.43 | 0.00018 | COMM domain containing 9 [Source:HGNC Symbol;Acc:HGNC:25014]                                                         |
| <i>PSMB8</i>       | 6  | p21.32 | -0.43 | 0.00797 | proteasome (prosome, macropain) subunit, beta type, 8 [Source:HGNC Symbol;Acc:HGNC:9545]                             |
| <i>C15orf61</i>    | 15 | q23    | -0.42 | 0.0006  | chromosome 15 open reading frame 61 [Source:HGNC Symbol;Acc:HGNC:34453]                                              |
| <i>MT-ND1</i>      | MT | n/a    | -0.42 | 0.00252 | mitochondrially encoded NADH dehydrogenase 1 [Source:HGNC Symbol;Acc:HGNC:7455]                                      |
| <i>NDUFS5</i>      | 1  | p34.3  | -0.39 | 0.00679 | NADH dehydrogenase (ubiquinone) Fe-S protein 5, 15kDa (NADH-coenzyme Q reductase) [Source:HGNC Symbol;Acc:HGNC:7712] |
| <i>FAM73B</i>      | 9  | q34.11 | -0.36 | 0.00287 | family with sequence similarity 73, member B [Source:HGNC Symbol;Acc:HGNC:23621]                                     |

|              |    |        |       |         |                                                                                           |
|--------------|----|--------|-------|---------|-------------------------------------------------------------------------------------------|
| <i>GAK</i>   | 4  | p16.3  | -0.31 | 0.00011 | cyclin G associated kinase [Source:HGNC Symbol;Acc:HGNC:4113]                             |
| <i>PSMA7</i> | 20 | q13.33 | -0.29 | 0.00788 | proteasome (prosome, macropain) subunit, alpha type, 7 [Source:HGNC Symbol;Acc:HGNC:9536] |

Abbreviations: Chrom., chromosome; log<sub>2</sub>FC, log<sub>2</sub> (base 2 logarithm) transformed fold change; q-value, false discovery rate adjusted p-value.

Genes without a description are clone-based and/or are of unknown function.

**Supplementary Table S10A.** Genes differentially expressed between patients who achieved CR versus those who did not

| <i>Genes upregulated in patients who did not achieve CR</i> |               |             |               |                |                                                                                                                                    |
|-------------------------------------------------------------|---------------|-------------|---------------|----------------|------------------------------------------------------------------------------------------------------------------------------------|
| <i>Gene symbol</i>                                          | <i>Chrom.</i> | <i>Band</i> | <i>log2FC</i> | <i>q-value</i> | <i>Description</i>                                                                                                                 |
| CEACAM6                                                     | 19            | q13.2       | -3.04         | 0.00004        | carcinoembryonic antigen-related cell adhesion molecule 6 (non-specific cross reacting antigen) [Source:HGNC Symbol;Acc:HGNC:1818] |
| TRBV27                                                      | 7             | q34         | -2.82         | 0.00060        | T cell receptor beta variable 27 [Source:HGNC Symbol;Acc:HGNC:12208]                                                               |
| ZNF827                                                      | 4             | q31.22      | -2.33         | 0.02048        | zinc finger protein 827 [Source:HGNC Symbol;Acc:HGNC:27193]                                                                        |
| ZSCAN18                                                     | 19            | q13.43      | -2.28         | 0.00514        | zinc finger and SCAN domain containing 18 [Source:HGNC Symbol;Acc:HGNC:21037]                                                      |
| AL122127.25                                                 | 14            | q32.33      | -2.08         | 0.08548        |                                                                                                                                    |
| NPM2                                                        | 8             | p21.3       | -2.07         | 0.03818        | nucleophosmin/nucleoplasmin 2 [Source:HGNC Symbol;Acc:HGNC:7930]                                                                   |
| GPR114                                                      | 16            | q21         | -2.03         | 0.01526        | G protein-coupled receptor 114 [Source:HGNC Symbol;Acc:HGNC:19010]                                                                 |
| TIE1                                                        | 1             | p34.2       | -2.02         | 0.08017        | tyrosine kinase with immunoglobulin-like and EGF-like domains 1 [Source:HGNC Symbol;Acc:HGNC:11809]                                |
| SH2D1A                                                      | X             | q25         | -1.98         | 0.06969        | SH2 domain containing 1A [Source:HGNC Symbol;Acc:HGNC:10820]                                                                       |
| ARHGAP22                                                    | 10            | q11.23      | -1.95         | 0.06969        | Rho GTPase activating protein 22 [Source:HGNC Symbol;Acc:HGNC:30320]                                                               |
| SPNS2                                                       | 17            | p13.2       | -1.95         | 0.09794        | spinster homolog 2 (Drosophila) [Source:HGNC Symbol;Acc:HGNC:26992]                                                                |
| EMID1                                                       | 22            | q12.2       | -1.94         | 0.08117        | EMI domain containing 1 [Source:HGNC Symbol;Acc:HGNC:18036]                                                                        |
| RP4-666F24.3                                                | 1             | p13.2       | -1.88         | 0.08548        |                                                                                                                                    |
| JUP                                                         | 17            | q21.2       | -1.87         | 0.03818        | junction plakoglobin [Source:HGNC Symbol;Acc:HGNC:6207]                                                                            |
| SSBP2                                                       | 5             | q14.1       | -1.83         | 0.03818        | single-stranded DNA binding protein 2 [Source:HGNC Symbol;Acc:HGNC:15831]                                                          |
| SEPP1                                                       | 5             | p12         | -1.81         | 0.05451        | selenoprotein P, plasma, 1 [Source:HGNC Symbol;Acc:HGNC:10751]                                                                     |
| NEDD4                                                       | 15            | q21.3       | -1.80         | 0.09794        | neural precursor cell expressed, developmentally down-regulated 4, E3 ubiquitin protein ligase [Source:HGNC Symbol;Acc:HGNC:7727]  |
| C9orf43                                                     | 9             | q32         | -1.79         | 0.09794        | chromosome 9 open reading frame 43 [Source:HGNC Symbol;Acc:HGNC:23570]                                                             |
| DNMT3B                                                      | 20            | q11.21      | -1.78         | 0.09876        | DNA (cytosine-5-)-methyltransferase 3 beta [Source:HGNC Symbol;Acc:HGNC:2979]                                                      |
| MACC1                                                       | 7             | p21.1       | -1.76         | 0.06969        | metastasis associated in colon cancer 1 [Source:HGNC Symbol;Acc:HGNC:30215]                                                        |
| RLTPR                                                       | 16            | q22.1       | -1.75         | 0.09876        | RGD motif, leucine rich repeats, tropomodulin domain and proline-rich containing [Source:HGNC Symbol;Acc:HGNC:27089]               |
| CTA-984G1.5                                                 | 22            | q12.2       | -1.74         | 0.09794        |                                                                                                                                    |
| SCARF1                                                      | 17            | p13.3       | -1.70         | 0.06969        | scavenger receptor class F, member 1 [Source:HGNC Symbol;Acc:HGNC:16820]                                                           |
| MN1                                                         | 22            | q12.1       | -1.69         | 0.06969        | meningioma (disrupted in balanced translocation) 1 [Source:HGNC Symbol;Acc:HGNC:7180]                                              |
| AF127936.7                                                  | 21            | q11.2       | -1.69         | 0.08967        |                                                                                                                                    |
| ZEB1                                                        | 10            | p11.22      | -1.67         | 0.09794        | zinc finger E-box binding homeobox 1 [Source:HGNC Symbol;Acc:HGNC:11642]                                                           |

|                                                               |               |             |               |                |                                                                                                            |
|---------------------------------------------------------------|---------------|-------------|---------------|----------------|------------------------------------------------------------------------------------------------------------|
| <i>GUCY2D</i>                                                 | 17            | p13.1       | -1.67         | 0.09794        | guanylate cyclase 2D, membrane (retina-specific) [Source:HGNC Symbol;Acc:HGNC:4689]                        |
| <i>LINC01150</i>                                              | 11            | p15.5       | -1.62         | 0.08967        | long intergenic non-protein coding RNA 1150 [Source:HGNC Symbol;Acc:HGNC:49469]                            |
| <i>SPNS3</i>                                                  | 17            | p13.2       | -1.58         | 0.09080        | spinster homolog 3 (Drosophila) [Source:HGNC Symbol;Acc:HGNC:28433]                                        |
| <i>RP11-93H24.3</i>                                           | 13            | q14.3       | -1.55         | 0.04531        |                                                                                                            |
| <i>VN1R1</i>                                                  | 19            | q13.43      | -1.53         | 0.06622        | vomeronal 1 receptor 1 [Source:HGNC Symbol;Acc:HGNC:13548]                                                 |
| <i>ZNF772</i>                                                 | 19            | q13.43      | -1.43         | 0.06969        | zinc finger protein 772 [Source:HGNC Symbol;Acc:HGNC:33106]                                                |
| <i>ZNF443</i>                                                 | 19            | p13.2       | -1.40         | 0.00199        | zinc finger protein 443 [Source:HGNC Symbol;Acc:HGNC:20878]                                                |
| <i>ZNF550</i>                                                 | 19            | q13.43      | -1.29         | 0.09794        | zinc finger protein 550 [Source:HGNC Symbol;Acc:HGNC:28643]                                                |
| <i>MAPKBP1</i>                                                | 15            | q15.1       | -1.11         | 0.07035        | mitogen-activated protein kinase binding protein 1 [Source:HGNC Symbol;Acc:HGNC:29536]                     |
| <i>JMJD7</i>                                                  | 15            | q15.1       | -0.90         | 0.08017        | jumonji domain containing 7 [Source:HGNC Symbol;Acc:HGNC:34397]                                            |
| <i>ODF2L</i>                                                  | 1             | p22.3       | -0.68         | 0.05451        | outer dense fiber of sperm tails 2-like [Source:HGNC Symbol;Acc:HGNC:29225]                                |
| <i>Genes downregulated in patients who did not achieve CR</i> |               |             |               |                |                                                                                                            |
| <i>Gene symbol</i>                                            | <i>Chrom.</i> | <i>Band</i> | <i>log2FC</i> | <i>q-value</i> | <i>Description</i>                                                                                         |
| <i>AMIGO2</i>                                                 | 12            | q13.11      | 2.80          | 0.00018        | adhesion molecule with Ig-like domain 2 [Source:HGNC Symbol;Acc:HGNC:24073]                                |
| <i>RAB11FIP5</i>                                              | 2             | p13.2       | 2.37          | 0.01469        | RAB11 family interacting protein 5 (class I) [Source:HGNC Symbol;Acc:HGNC:24845]                           |
| <i>KCTD1</i>                                                  | 18            | q11.2       | 2.18          | 0.00590        | potassium channel tetramerization domain containing 1 [Source:HGNC Symbol;Acc:HGNC:18249]                  |
| <i>KCNC3</i>                                                  | 19            | q13.33      | 2.10          | 0.05451        | potassium voltage-gated channel, Shaw-related subfamily, member 3 [Source:HGNC Symbol;Acc:HGNC:6235]       |
| <i>CD276</i>                                                  | 15            | q24.1       | 2.02          | 0.03818        | CD276 molecule [Source:HGNC Symbol;Acc:HGNC:19137]                                                         |
| <i>FAM110B</i>                                                | 8             | q12.1       | 1.87          | 0.08017        | family with sequence similarity 110, member B [Source:HGNC Symbol;Acc:HGNC:28587]                          |
| <i>TEF</i>                                                    | 22            | q13.2       | 1.75          | 0.09876        | thyrotrophic embryonic factor [Source:HGNC Symbol;Acc:HGNC:11722]                                          |
| <i>PCED1B</i>                                                 | 12            | q13.11      | 1.66          | 0.09876        | PC-esterase domain containing 1B [Source:HGNC Symbol;Acc:HGNC:28255]                                       |
| <i>RP13-977J11.2</i>                                          | 12            | q24.33      | 1.54          | 0.09794        |                                                                                                            |
| <i>CTC-428G20.6</i>                                           | 5             | q22.3       | 1.51          | 0.06969        |                                                                                                            |
| <i>TMEM104</i>                                                | 17            | q25.1       | 1.46          | 0.09876        | transmembrane protein 104 [Source:HGNC Symbol;Acc:HGNC:25984]                                              |
| <i>AIFM2</i>                                                  | 10            | q22.1       | 1.42          | 0.05778        | apoptosis-inducing factor, mitochondrion-associated, 2 [Source:HGNC Symbol;Acc:HGNC:21411]                 |
| <i>RP11-106D4.2</i>                                           | 16            | q24.2       | 1.38          | 0.07035        |                                                                                                            |
| <i>CTD-2538C1.2</i>                                           | 19            | q13.11      | 1.33          | 0.07035        |                                                                                                            |
| <i>ULBP1</i>                                                  | 6             | q25.1       | 1.13          | 0.09794        | UL16 binding protein 1 [Source:HGNC Symbol;Acc:HGNC:14893]                                                 |
| <i>RP11-159D12.5</i>                                          | 17            | q22         | 1.13          | 0.09794        | Uncharacterized protein {ECO:0000313 Ensembl:ENSP00000463235} [Source:UniProtKB/TrEMBL;Acc:J3QKU1]         |
| <i>POMGNT2</i>                                                | 3             | p22.1       | 0.70          | 0.00199        | protein O-linked mannose N-acetylglucosaminyltransferase 2 (beta 1,4-) [Source:HGNC Symbol;Acc:HGNC:25902] |

**Supplementary Table S10B.** Genes differentially expressed between those who achieved CR versus those who did not controlling for translocation partner

| <i>Genes upregulated in patients who did not achieve CR</i> |               |             |               |                |                                                                                                                                   |
|-------------------------------------------------------------|---------------|-------------|---------------|----------------|-----------------------------------------------------------------------------------------------------------------------------------|
| <i>Gene symbol</i>                                          | <i>Chrom.</i> | <i>Band</i> | <i>log2FC</i> | <i>q-value</i> | <i>Description</i>                                                                                                                |
| ZNF827                                                      | 4             | q31.22      | -2.56         | 0.01437        | zinc finger protein 827 [Source:HGNC Symbol;Acc:HGNC:27193]                                                                       |
| TRBV20-1                                                    | 7             | q34         | -2.36         | 0.01519        | T cell receptor beta variable 20-1 [Source:HGNC Symbol;Acc:HGNC:12196]                                                            |
| ANO7                                                        | 2             | q37.3       | -2.33         | 0.06018        | anoctamin 7 [Source:HGNC Symbol;Acc:HGNC:31677]                                                                                   |
| KIAA0125                                                    | 14            | q32.33      | -2.32         | 0.07618        | KIAA0125 [Source:HGNC Symbol;Acc:HGNC:19955]                                                                                      |
| MDGA1                                                       | 6             | p21.2       | -2.31         | 0.03439        | MAM domain containing glycosylphosphatidylinositol anchor 1 [Source:HGNC Symbol;Acc:HGNC:19267]                                   |
| GPR114                                                      | 16            | q21         | -2.29         | 0.00230        | G protein-coupled receptor 114 [Source:HGNC Symbol;Acc:HGNC:19010]                                                                |
| IL17RE                                                      | 3             | p25.3       | -2.11         | 0.08722        | interleukin 17 receptor E [Source:HGNC Symbol;Acc:HGNC:18439]                                                                     |
| SEPP1                                                       | 5             | p12         | -2.10         | 0.00230        | selenoprotein P, plasma, 1 [Source:HGNC Symbol;Acc:HGNC:10751]                                                                    |
| JUP                                                         | 17            | q21.2       | -2.03         | 0.01388        | junction plakoglobin [Source:HGNC Symbol;Acc:HGNC:6207]                                                                           |
| C9orf43                                                     | 9             | q32         | -2.03         | 0.05130        | chromosome 9 open reading frame 43 [Source:HGNC Symbol;Acc:HGNC:23570]                                                            |
| ARHGAP22                                                    | 10            | q11.23      | -2.03         | 0.05566        | Rho GTPase activating protein 22 [Source:HGNC Symbol;Acc:HGNC:30320]                                                              |
| EMID1                                                       | 22            | q12.2       | -1.97         | 0.05130        | EMI domain containing 1 [Source:HGNC Symbol;Acc:HGNC:18036]                                                                       |
| SERPING1                                                    | 11            | q12.1       | -1.96         | 0.03342        | serpin peptidase inhibitor, clade G (C1 inhibitor), member 1 [Source:HGNC Symbol;Acc:HGNC:1228]                                   |
| CTA-984G1.5                                                 | 22            | q12.2       | -1.95         | 0.00685        |                                                                                                                                   |
| NPM2                                                        | 8             | p21.3       | -1.92         | 0.09670        | nucleophosmin/nucleoplasmin 2 [Source:HGNC Symbol;Acc:HGNC:7930]                                                                  |
| NEDD4                                                       | 15            | q21.3       | -1.91         | 0.09916        | neural precursor cell expressed, developmentally down-regulated 4, E3 ubiquitin protein ligase [Source:HGNC Symbol;Acc:HGNC:7727] |
| MACC1                                                       | 7             | p21.1       | -1.88         | 0.05130        | metastasis associated in colon cancer 1 [Source:HGNC Symbol;Acc:HGNC:30215]                                                       |
| ZNF439                                                      | 19            | p13.2       | -1.88         | 0.09916        | zinc finger protein 439 [Source:HGNC Symbol;Acc:HGNC:20873]                                                                       |
| RP13-714J12.1                                               | 12            | q24.33      | -1.85         | 0.05676        |                                                                                                                                   |
| MN1                                                         | 22            | q12.1       | -1.84         | 0.03525        | meningioma (disrupted in balanced translocation) 1 [Source:HGNC Symbol;Acc:HGNC:7180]                                             |
| AF127936.7                                                  | 21            | q11.2       | -1.80         | 0.07618        |                                                                                                                                   |
| SPNS3                                                       | 17            | p13.2       | -1.79         | 0.01757        | spinster homolog 3 (Drosophila) [Source:HGNC Symbol;Acc:HGNC:28433]                                                               |
| SSBP2                                                       | 5             | q14.1       | -1.79         | 0.03525        | single-stranded DNA binding protein 2 [Source:HGNC Symbol;Acc:HGNC:15831]                                                         |
| SCARF1                                                      | 17            | p13.3       | -1.79         | 0.05327        | scavenger receptor class F, member 1 [Source:HGNC Symbol;Acc:HGNC:16820]                                                          |
| SV2A                                                        | 1             | q21.2       | -1.76         | 0.06188        | synaptic vesicle glycoprotein 2A [Source:HGNC Symbol;Acc:HGNC:20566]                                                              |
| VSIG10                                                      | 12            | q24.23      | -1.76         | 0.07177        | V-set and immunoglobulin domain containing 10 [Source:HGNC Symbol;Acc:HGNC:26078]                                                 |



| <i>RP11-93H24.3</i>                                           | 13            | q14.3       | -1.61         | 0.03342        |                                                                                                        |
|---------------------------------------------------------------|---------------|-------------|---------------|----------------|--------------------------------------------------------------------------------------------------------|
| <i>ZNF772</i>                                                 | 19            | q13.43      | -1.53         | 0.02058        | zinc finger protein 772 [Source:HGNC Symbol;Acc:HGNC:33106]                                            |
| <i>USP53</i>                                                  | 4             | q26         | -1.49         | 0.09916        | ubiquitin specific peptidase 53 [Source:HGNC Symbol;Acc:HGNC:29255]                                    |
| <i>ZNF443</i>                                                 | 19            | p13.2       | -1.41         | 0.00230        | zinc finger protein 443 [Source:HGNC Symbol;Acc:HGNC:20878]                                            |
| <i>ZFP30</i>                                                  | 19            | q13.12      | -1.36         | 0.09916        | ZFP30 zinc finger protein [Source:HGNC Symbol;Acc:HGNC:29555]                                          |
| <i>ZNF550</i>                                                 | 19            | q13.43      | -1.26         | 0.09691        | zinc finger protein 550 [Source:HGNC Symbol;Acc:HGNC:28643]                                            |
| <i>TXNDC16</i>                                                | 14            | q22.1       | -1.22         | 0.02816        | thioredoxin domain containing 16 [Source:HGNC Symbol;Acc:HGNC:19965]                                   |
| <i>ZNF85</i>                                                  | 19            | p12         | -1.18         | 0.00895        | zinc finger protein 85 [Source:HGNC Symbol;Acc:HGNC:13160]                                             |
| <i>ZNF528</i>                                                 | 19            | q13.41      | -1.12         | 0.00230        | zinc finger protein 528 [Source:HGNC Symbol;Acc:HGNC:29384]                                            |
| <i>MAPKBP1</i>                                                | 15            | q15.1       | -1.10         | 0.02055        | mitogen-activated protein kinase binding protein 1 [Source:HGNC Symbol;Acc:HGNC:29536]                 |
| <i>JMJD7</i>                                                  | 15            | q15.1       | -0.95         | 0.00230        | jumonji domain containing 7 [Source:HGNC Symbol;Acc:HGNC:34397]                                        |
| <i>PHLPP1</i>                                                 | 18            | q21.33      | -0.92         | 0.09916        | PH domain and leucine rich repeat protein phosphatase 1 [Source:HGNC Symbol;Acc:HGNC:20610]            |
| <i>EFHC1</i>                                                  | 6             | p12.2       | -0.91         | 0.09777        | EF-hand domain (C-terminal) containing 1 [Source:HGNC Symbol;Acc:HGNC:16406]                           |
| <i>TRPV1</i>                                                  | 17            | p13.2       | -0.80         | 0.00584        | transient receptor potential cation channel, subfamily V, member 1 [Source:HGNC Symbol;Acc:HGNC:12716] |
| <i>ODF2L</i>                                                  | 1             | p22.3       | -0.64         | 0.00685        | outer dense fiber of sperm tails 2-like [Source:HGNC Symbol;Acc:HGNC:29225]                            |
| <i>Genes downregulated in patients who did not achieve CR</i> |               |             |               |                |                                                                                                        |
| <i>Gene symbol</i>                                            | <i>Chrom.</i> | <i>Band</i> | <i>log2FC</i> | <i>q-value</i> | <i>Description</i>                                                                                     |
| <i>AMIGO2</i>                                                 | 12            | q13.11      | 3.05          | 0.00029        | adhesion molecule with Ig-like domain 2 [Source:HGNC Symbol;Acc:HGNC:24073]                            |
| <i>TUBB3</i>                                                  | 16            | q24.3       | 2.66          | 0.00206        | tubulin, beta 3 class III [Source:HGNC Symbol;Acc:HGNC:20772]                                          |
| <i>KCTD1</i>                                                  | 18            | q11.2       | 2.64          | 0.00009        | potassium channel tetramerization domain containing 1 [Source:HGNC Symbol;Acc:HGNC:18249]              |
| <i>RAB11FIP5</i>                                              | 2             | p13.2       | 2.64          | 0.00685        | RAB11 family interacting protein 5 (class I) [Source:HGNC Symbol;Acc:HGNC:24845]                       |
| <i>CLDN23</i>                                                 | 8             | p23.1       | 2.36          | 0.05676        | claudin 23 [Source:HGNC Symbol;Acc:HGNC:17591]                                                         |
| <i>C10orf35</i>                                               | 10            | q22.1       | 2.34          | 0.00450        | chromosome 10 open reading frame 35 [Source:HGNC Symbol;Acc:HGNC:23519]                                |
| <i>CDR2L</i>                                                  | 17            | q25.1       | 2.30          | 0.00230        | cerebellar degeneration-related protein 2-like [Source:HGNC Symbol;Acc:HGNC:29999]                     |
| <i>PDE4A</i>                                                  | 19            | p13.2       | 2.19          | 0.05130        | phosphodiesterase 4A, cAMP-specific [Source:HGNC Symbol;Acc:HGNC:8780]                                 |
| <i>HNRNPLL</i>                                                | 2             | p22.1       | 2.18          | 0.00996        | heterogeneous nuclear ribonucleoprotein L-like [Source:HGNC Symbol;Acc:HGNC:25127]                     |
| <i>DCHS1</i>                                                  | 11            | p15.4       | 2.12          | 0.03342        | dachsous cadherin-related 1 [Source:HGNC Symbol;Acc:HGNC:13681]                                        |
| <i>PLCD1</i>                                                  | 3             | p22.2       | 2.11          | 0.00685        | phospholipase C, delta 1 [Source:HGNC Symbol;Acc:HGNC:9060]                                            |
| <i>CEP170B</i>                                                | 14            | q32.33      | 2.04          | 0.00685        | centrosomal protein 170B [Source:HGNC Symbol;Acc:HGNC:20362]                                           |
| <i>C17orf96</i>                                               | 17            | q12         | 2.04          | 0.01528        | chromosome 17 open reading frame 96 [Source:HGNC Symbol;Acc:HGNC:34493]                                |

|                      |    |        |      |         |                                                                                                            |
|----------------------|----|--------|------|---------|------------------------------------------------------------------------------------------------------------|
| <i>CDC42BPB</i>      | 14 | q32.32 | 1.88 | 0.06679 | CDC42 binding protein kinase beta (DMPK-like) [Source:HGNC Symbol;Acc:HGNC:1738]                           |
| <i>MSX2</i>          | 5  | q35.2  | 1.88 | 0.09587 | msh homeobox 2 [Source:HGNC Symbol;Acc:HGNC:7392]                                                          |
| <i>TEF</i>           | 22 | q13.2  | 1.88 | 0.09691 | thyrotrophic embryonic factor [Source:HGNC Symbol;Acc:HGNC:11722]                                          |
| <i>ZNF503</i>        | 10 | q22.2  | 1.87 | 0.03342 | zinc finger protein 503 [Source:EntrezGene;Acc:84858]                                                      |
| <i>PCED1B</i>        | 12 | q13.11 | 1.76 | 0.09916 | PC-esterase domain containing 1B [Source:HGNC Symbol;Acc:HGNC:28255]                                       |
| <i>SOX13</i>         | 1  | q32.1  | 1.71 | 0.01519 | SRY (sex determining region Y)-box 13 [Source:HGNC Symbol;Acc:HGNC:11192]                                  |
| <i>CTD-2357A8.3</i>  | 17 | q25.3  | 1.55 | 0.09587 |                                                                                                            |
| <i>SNPH</i>          | 20 | p13    | 1.49 | 0.02055 | syntaphilin [Source:HGNC Symbol;Acc:HGNC:15931]                                                            |
| <i>AIFM2</i>         | 10 | q22.1  | 1.44 | 0.05130 | apoptosis-inducing factor, mitochondrion-associated, 2 [Source:HGNC Symbol;Acc:HGNC:21411]                 |
| <i>CTD-2538C1.2</i>  | 19 | q13.11 | 1.40 | 0.05140 |                                                                                                            |
| <i>RP11-106D4.2</i>  | 16 | q24.2  | 1.40 | 0.05297 |                                                                                                            |
| <i>RP11-159D12.5</i> | 17 | q22    | 1.27 | 0.00664 | Uncharacterized protein {ECO:0000313 Ensembl:ENSP00000463235} [Source:UniProtKB/TrEMBL;Acc:J3QKU1]         |
| <i>PCED1B-AS1</i>    | 12 | q13.11 | 1.27 | 0.09916 | PCED1B antisense RNA 1 [Source:HGNC Symbol;Acc:HGNC:44166]                                                 |
| <i>ULBP1</i>         | 6  | q25.1  | 1.16 | 0.09916 | UL16 binding protein 1 [Source:HGNC Symbol;Acc:HGNC:14893]                                                 |
| <i>GAA</i>           | 17 | q25.3  | 1.03 | 0.09928 | glucosidase, alpha; acid [Source:HGNC Symbol;Acc:HGNC:4065]                                                |
| <i>LTBP4</i>         | 19 | q13.2  | 0.95 | 0.07618 | latent transforming growth factor beta binding protein 4 [Source:HGNC Symbol;Acc:HGNC:6717]                |
| <i>NKRF</i>          | X  | q24    | 0.74 | 0.09916 | NFKB repressing factor [Source:HGNC Symbol;Acc:HGNC:19374]                                                 |
| <i>POMGNT2</i>       | 3  | p22.1  | 0.70 | 0.00450 | protein O-linked mannose N-acetylglucosaminyltransferase 2 (beta 1,4-) [Source:HGNC Symbol;Acc:HGNC:25902] |

Abbreviations: Chrom., chromosome; log<sub>2</sub>FC, log<sub>2</sub> (base 2 logarithm) transformed fold change; q-value, false discovery rate adjusted p-value.

Genes without a description are clone-based and/or are of unknown function.

**Supplementary Figure S1.** Outcome of AML patients with t(11;19)(q23;p13.1) and AML patients plus one with ambiguous lineage acute leukemia with t(11;19)(q23;p13.3) for whom survival data are available. (a) Disease-free survival. (b) Overall survival.

**Figure S1a**

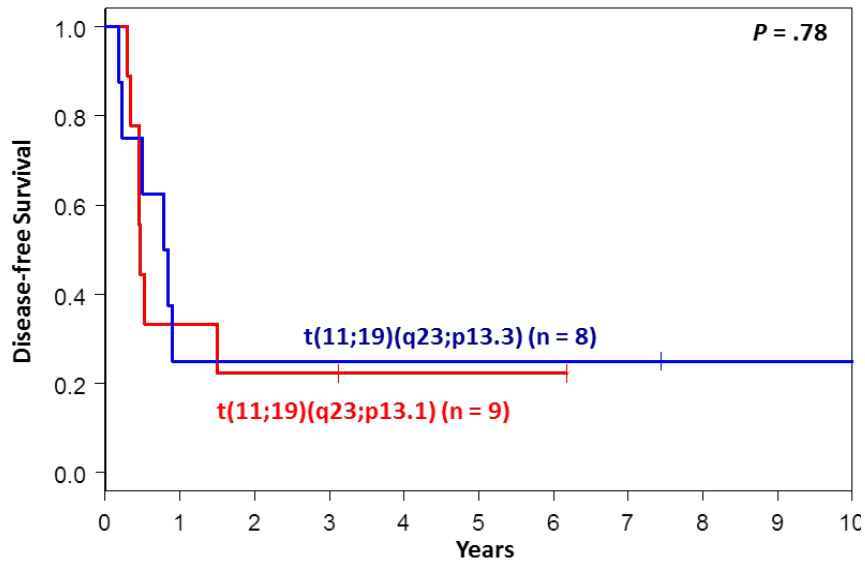

**Figure S1b**

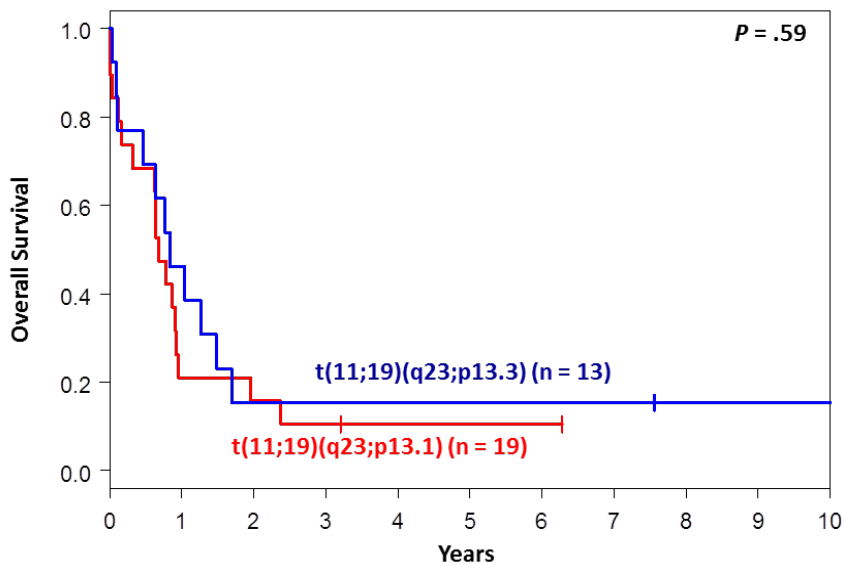

**Supplementary Figure S2.** Gene set enrichment analysis of 690 genes differentially expressed between patients with t(11;19)(q23;p13.3) and those with t(11;19)(q23;p13.1). The figure depicts significant (FDR < 0.001 for both gene sets) overlap between genes downregulated in t(11;19)(q23;p13.3) cases and genes downregulated in two stem cell signatures. Each vertical black tick in the middle of the figure represents a “hit” or an overlap between the two gene sets. Hits occurring in the red portion labeled ‘na\_pos’ are genes upregulated in t(11;19)(q23;p13.3) cases whereas hits in the blue portion labeled ‘na\_neg’ are genes downregulated. Gene sets JAATINEN\_HEMATOPOIETIC\_STEM\_CELL\_DN and GAL\_LEUKEMIC\_STEM\_CELL\_DN reflect genes downregulated in hematopoietic stem cells and leukemia stem cells, respectively, and are available at The Broad Institute’s MSigDB (<http://www.broadinstitute.org/sea/msigdb/>).

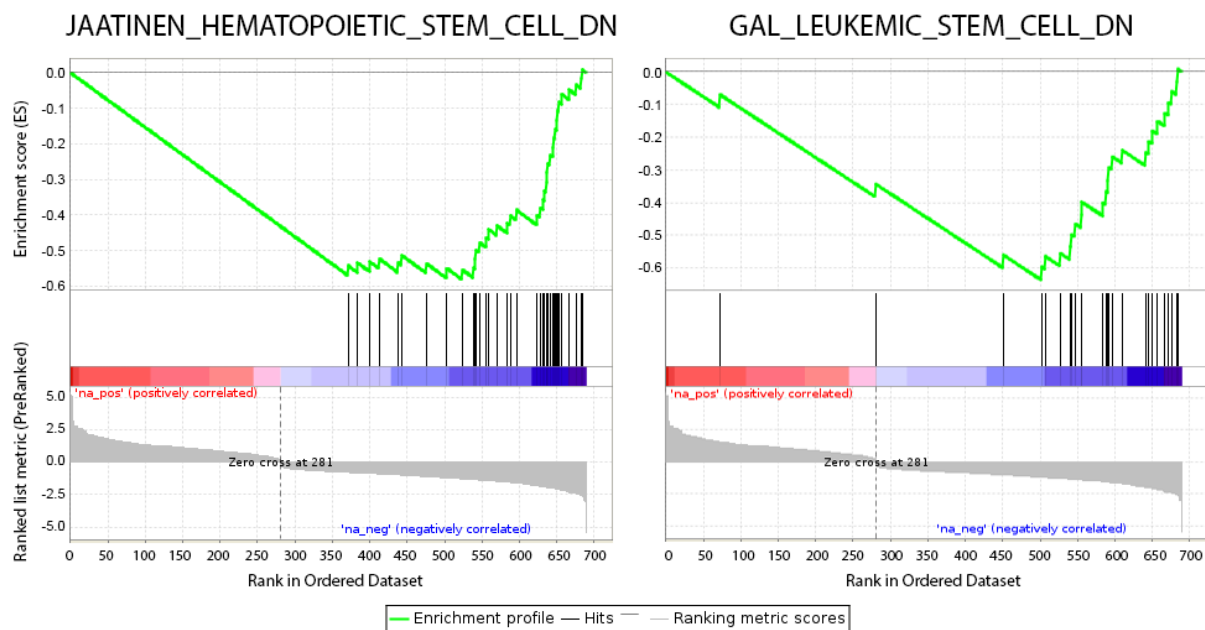

**Supplementary Figure S3.** Principal component analysis plot as in the main text, but colored for both translocation cytogenetic band and whether the translocation exists as a sole cytogenetic abnormality. As seen here, absence or presence of multiple cytogenetic abnormalities does not adequately explain the clustering of the data. PC1, first principal component; PC2, second principal component.

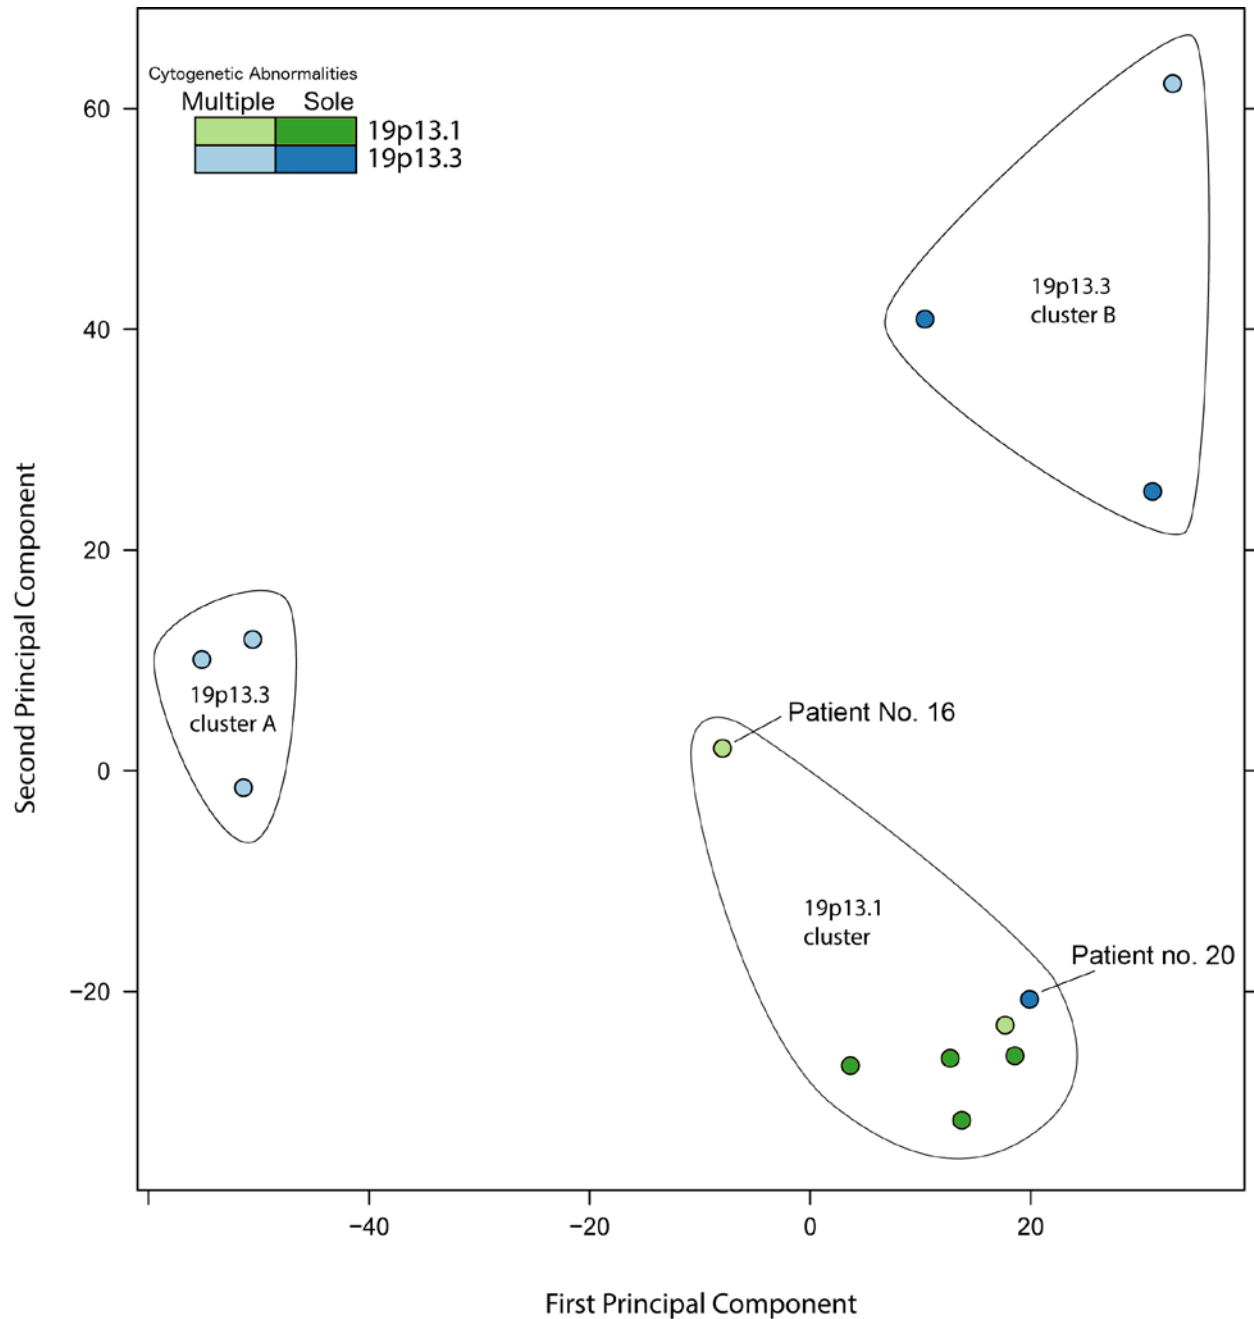

Supplement: NIHMS802629-supplement-Supp_Info.pdf [file NIHMS802629-supplement-Supp_Info.pdf]
